# Supplementary material for: Stereo flexible synthesis of the C8–C23 fragment of antarlides, androgen receptor antagonists
Source: Royal Society of Chemistry journal article supplement (doi:10.1039/d4ob00852a), 2024-01-01

# Supplementary Information

## Stereo Flexible Synthesis of the C8-C23 Fragment of Antarlides, Androgen Receptor Antagonists

Palash Ghosh,<sup>a,b</sup> Pralay Das,<sup>a,b</sup> Prathama S. Mainkar,<sup>a,b</sup> Thenkrishnan Kumaraguru,<sup>a,b</sup>  
Rudrakshula Madhavachary\*<sup>a</sup> and Srivari Chandrasekhar\*<sup>a,b</sup>

<sup>a</sup>Department of Organic Synthesis & Process Chemistry, CSIR-Indian Institute of Chemical  
Technology (CSIR-IICT), Hyderabad 500007, India.

<sup>b</sup>Academy of Scientific and Innovative Research (AcSIR), Ghaziabad 201002, India.

\* E-mail: [m.c.rudrakshula@gmail.com](mailto:m.c.rudrakshula@gmail.com), \* E-mail: [srivari@iict.res.in](mailto:srivari@iict.res.in)

## Contents

|                                                                        |            |
|------------------------------------------------------------------------|------------|
| <b>1. General Informational.....</b>                                   | <b>S1</b>  |
| <b>2. Experimental Procedures and Analytical Data.....</b>             | <b>S1</b>  |
| 2.1. The procedure for enzymatic hydrolysis.....                       | S1         |
| 2.2. Synthesis of key aldehyde (+)- <b>7</b> from (+)- <b>4a</b> ..... | S3         |
| 2.3. Synthesis of key aldehyde (+)- <b>7</b> from (–)- <b>3a</b> ..... | S6         |
| 2.4. Synthesis of Julia-Kocienski olefination partner fragment 19..... | S8         |
| 2.5. Synthesis of Julia-Kocienski olefination partner fragment 28..... | S24        |
| 2.6 Synthesis of C8–C23 Fragment of Antarlides.....                    | S33        |
| <b>3. References.....</b>                                              | <b>S34</b> |
| <b>4. NMR Spectra for New Compounds.....</b>                           | <b>S35</b> |



resulting crude mixture was separated by column chromatography using ethyl acetate–hexanes in a gradient from 0:1 to 1:1 as an eluent, resulting in the enantiomerically enriched deacetylated product (+)-**4a** (yield: 31.0 g; 33.8%, >95% ee, see [Figure S1&S2](#)) and unreacted material (67.0 g).

The unreacted material again reacted with *CAL-B* enzyme using the same reaction procedure described above, ultimately producing compound (–)-**3a** (48.0 g, 43.0%) with >99% ee and (+)-**4a** (yield: 7.0 g; 12.8%, >95% ee). The chiral purity of (–)-**3a** was analyzed after deacetylation using a catalytic amount of K<sub>2</sub>CO<sub>3</sub> in methanol (see [Figure S3](#)).

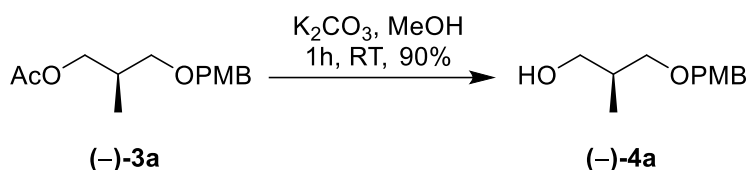

The enantiomeric excess was determined by chiral stationary phase HPLC using a Daicel Chiralpak OD-H column (250 x 4.6 mm) (hexane/2-propanol = 98:02, flow rate 0.7 mL/min,  $\lambda = 220$  nm), for (+)-**4a**:  $t_R = 42.17$  min (minor),  $t_R = 43.07$  min (major) ([Figure S1 & S2](#)) and for (–)-**4a**:  $t_R = 41.34$  min (major) ([Figure S3](#)).

For (+)-**4a**:  $[\alpha]^{20}_D = -2.4^\circ$  ( $c = 0.67$  in EtOH) [Reported<sup>1</sup>  $[\alpha]^{20}_D = -2.8^\circ$  ( $c = 0.67$  in EtOH)]

<sup>1</sup>H NMR (400 MHz, CDCl<sub>3</sub>)  $\delta$  7.24 (d,  $J = 8.5$  Hz, 2H), 6.88 (d,  $J = 8.5$  Hz, 2H), 4.44 (s, 2H), 3.80 (s, 3H), 3.65 – 3.56 (m, 2H), 3.55 – 3.48 (m, 1H), 3.39 (t,  $J = 8.6$  Hz, 1H), 2.10 – 2.00 (m, 1H), 0.87 (d,  $J = 7.0$  Hz, 3H); <sup>13</sup>C NMR (101 MHz, CDCl<sub>3</sub>)  $\delta$  159.3, 130.2, 129.3, 113.9, 75.1, 73.1, 67.8, 55.3, 35.6, 13.6; IR (neat): 2923, 2862, 1612, 1515, 1462, 1366, 1249, 1091, 1036 and 822 cm<sup>-1</sup>; HRMS (ESI-TOF): calculated for C<sub>12</sub>H<sub>18</sub>O<sub>3</sub>Na [M+Na]<sup>+</sup> 233.1148; found: 233.1148. [See NMR spectra](#)

For (–)-**3a**:  $[\alpha]^{22}_D = -7.6^\circ$  ( $c = 0.08$  in EtOH) [Reported<sup>1</sup>  $[\alpha]^{22}_D = -5.0^\circ$  ( $c = 0.8$  in EtOH)]

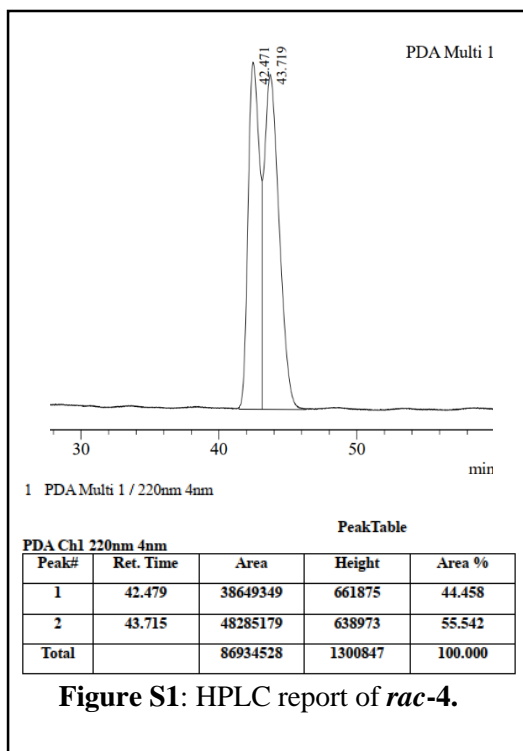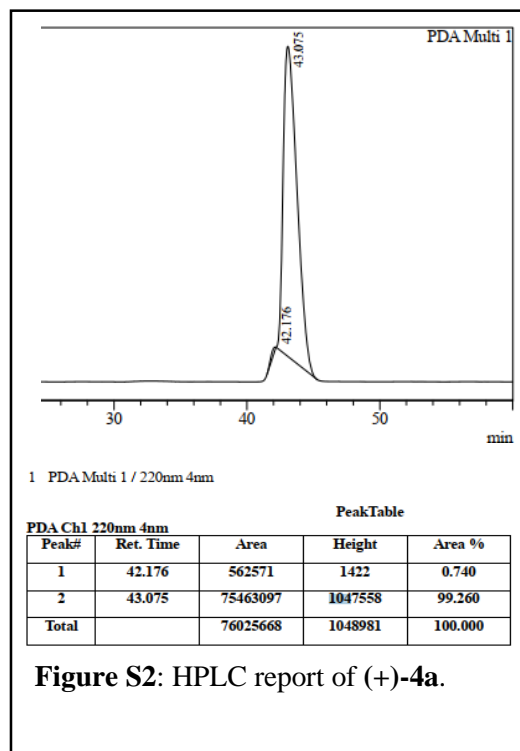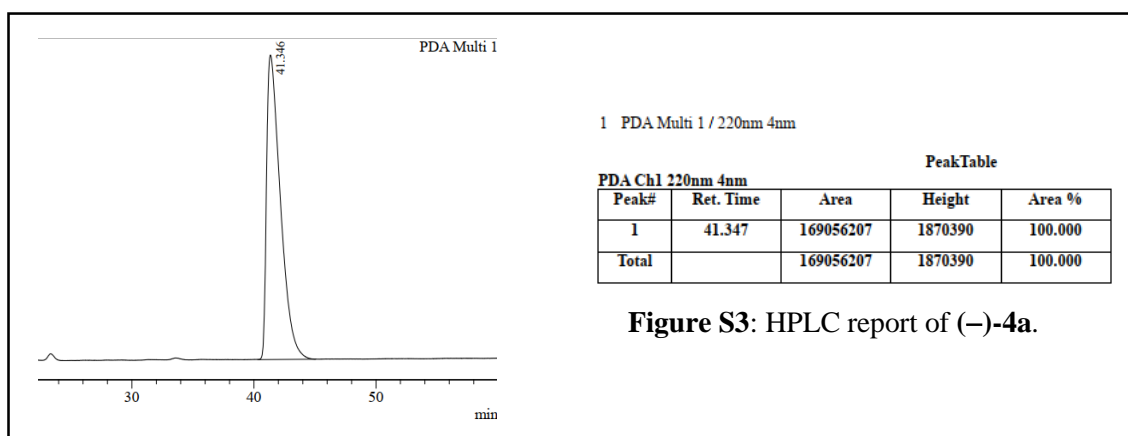

## 2.2. Synthesis of key aldehyde (+)-7 from (+)-4a:

### (*S*)-3-((4-Methoxybenzyl)oxy)-2-methylpropyl 4-methylbenzenesulfonate (**5**):

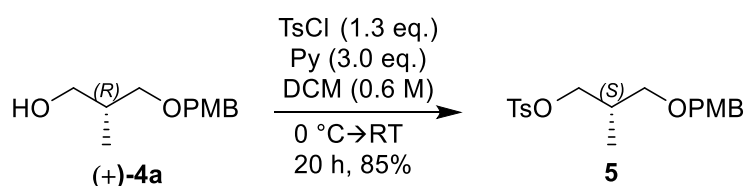

In a 1 L two neck round bottom flask, (*R*)-3-((4-Methoxybenzyl)oxy)-2-methylpropan-1-ol (**(+)-4a**) (35.0 g, 166.7 mmol, 1.0 eq) was dissolved in dry dichloromethane (300.0 mL) and cooled to 0 °C. Subsequently, pyridine (40.0 mL, 500.0 mmol, 3.0 eq.) was added. After a 15-

minute interval, *p*-toluenesulfonyl chloride (41.3 g, 217.0 mmol, 1.3 eq.) was slowly introduced, and the mixture was stirred at room temperature for 20 hours. Following the reaction's completion, confirmed by TLC, the reaction mixture was neutralized with 1N aqueous hydrochloric acid and subsequently extracted with DCM (2 x 400 mL). The organic layer was separated, washed with a brine solution (200 mL), dried over Na<sub>2</sub>SO<sub>4</sub>, filtered, and concentrated under reduced pressure. The resulting crude residue was purified by flash chromatography on silica gel using a gradient of 0-10% ethyl acetate in hexanes as the eluent, resulted compound **5** (51.5 g, 85% yield) as a colorless liquid. *R<sub>f</sub>* = 0.4 (ethyl acetate/hexane 1:9); [ $\alpha$ ]<sup>20</sup><sub>D</sub> = +5.2° (*c* = 0.5 in CHCl<sub>3</sub>); <sup>1</sup>H NMR (400 MHz, CDCl<sub>3</sub>):  $\delta$  7.77 (d, *J* = 8.3 Hz, 2H), 7.31 (d, *J* = 8.0 Hz, 2H), 7.16 (d, *J* = 8.7 Hz, 2H), 6.85 (d, *J* = 8.7 Hz, 2H), 4.33 (s, 2H), 4.12 – 3.83 (m, 2H), 3.80 (s, 3H), 3.45 – 3.17 (m, 2H), 2.42 (s, 3H), 2.15 – 2.04 (m, 1H), 0.92 (d, *J* = 6.9 Hz, 3H); <sup>13</sup>C NMR (101 MHz, CDCl<sub>3</sub>):  $\delta$  159.2, 144.7, 133.1, 130.4, 129.9, 129.2, 128.0, 113.8, 72.8, 72.4, 70.9, 55.4, 33.8, 21.7, 13.7; IR (neat): 2929, 2861, 1736, 1612, 1515, 1463, 1364, 1251, 1099, 973, and 761 cm<sup>-1</sup>; HRMS (ESI-TOF): calculated for C<sub>19</sub>H<sub>24</sub>O<sub>5</sub>SNa [M+Na]<sup>+</sup> 387.1237; found: 387.1234. [See NMR spectra](#)

**(R)-1-Methoxy-4-(((2-methylhex-5-en-1-yl)oxy)methyl)benzene (6):**

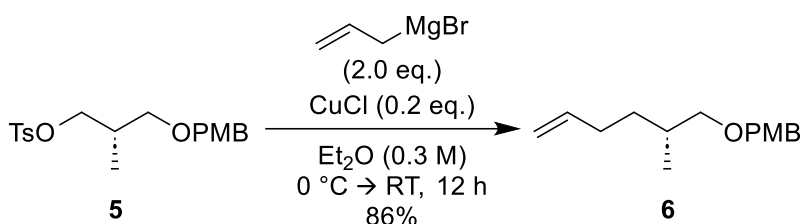

In a 1 L two-neck round bottom flask, allyl magnesium bromide (1.0 M solution in Et<sub>2</sub>O, 137.0 mL, 137.0 mmol, 2.0 eq.) was introduced into a suspension of CuCl (1.36 g, 1.37 mmol, 0.2 eq.) in Et<sub>2</sub>O (150 mL) at 0 °C. After being stirred for 10 minutes, a solution of compound **5** (25.0 g, 68.6 mmol, 1.0 eq.) in Et<sub>2</sub>O (50.0 mL) was added at 0 °C. The resulting mixture was stirred for 12 hours at room temperature, then quenched with a saturated aq. NH<sub>4</sub>Cl (100 mL), and extracted the compound with diethyl ether (2 x 400 mL). The combined organic layers were washed with brine, dried over Na<sub>2</sub>SO<sub>4</sub>, filtered, and concentrated under reduced pressure. The crude product was purified by flash chromatography on silica gel (elution with hexane) to obtain alkene **6** (13.8 g, 86%); *R<sub>f</sub>* = 0.8 (ethyl acetate/hexane 5:95); [ $\alpha$ ]<sup>20</sup><sub>D</sub> = -4.7° (*c* = 1.0 in CHCl<sub>3</sub>); <sup>1</sup>H NMR (400 MHz, CDCl<sub>3</sub>):  $\delta$  7.25 (d, *J* = 8.7 Hz, 2H), 6.87 (d, *J* = 8.7 Hz, 2H), 5.86 – 5.73 (m, 1H), 5.11 – 4.85 (m, 2H), 4.44 (s, 2H), 3.79 (s, 3H), 3.29 (dd, *J* = 9.1, 6.1 Hz, 1H), 3.22 (dd, *J* = 9.1, 6.6 Hz, 1H), 2.23 – 1.93 (m, 2H), 1.84 – 1.70 (m, 1H), 1.62 – 1.41 (m, 1H), 1.27 – 1.13 (m, 1H), 0.92 (d, *J* = 6.7 Hz, 3H); <sup>13</sup>C NMR (126 MHz, CDCl<sub>3</sub>)  $\delta$  159.2, 139.2, 131.0, 129.2, 114.3, 113.8, 75.6, 72.7, 55.4, 33.1, 33.0, 31.3, 17.1; IR (neat): 2927, 2857, 1615,

1516, 1461, 1250, 1096, 1038, 824 and 760  $\text{cm}^{-1}$ ; **HRMS** (ESI-TOF): calculated for  $\text{C}_{15}\text{H}_{22}\text{O}_2\text{Na}$   $[\text{M}+\text{Na}]^+$  257.1512; found: 257.1511. [See NMR spectra](#)

**(R)-5-((4-Methoxybenzyl)oxy)-4-methylpentanal [(+)-7]:**

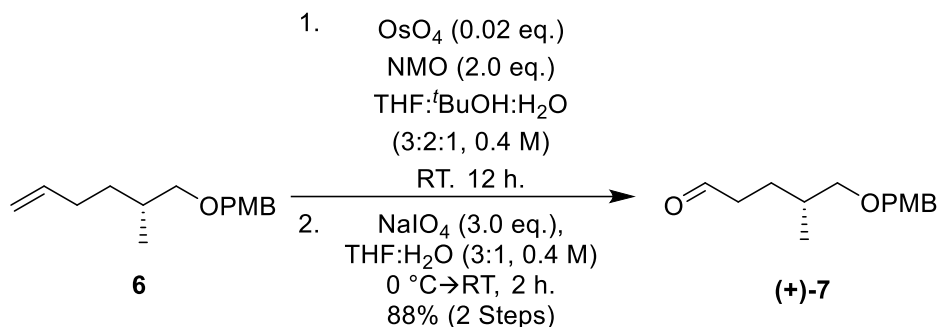

Alkene **6** (13.8 g, 59.0 mmol, 1.0 eq.) was charged in a 1 L RB flask and dissolved in THF (90 mL). Subsequently, <sup>t</sup>BuOH (45 mL), water (15 mL), NMO (13.8 g, 118.0 mmol, 2.0 eq.), and  $\text{OsO}_4$  (0.016 M in toluene, 73.0 mL, 1.18 mmol, 0.02 eq.) were added simultaneously at room temperature. The resulting mixture was stirred for 16 h at the same temperature, then quenched with  $\text{Na}_2\text{S}_2\text{O}_3 \cdot 5\text{H}_2\text{O}$  (30.0 g) and water (200 mL). Stirring was continued for an additional 2 h. The organic layer was extracted with EtOAc (2 x 300 mL), washed with brine (100 mL), dried over  $\text{Na}_2\text{SO}_4$ , filtered, and concentrated in vacuo to obtain the corresponding crude diol.

The above crude reaction mixture was dissolved in THF: $\text{H}_2\text{O}$  (3:1, 160 mL) and at 0 °C,  $\text{NaIO}_4$  (37.0 g, 177.0 mmol, 3.0 eq.) was added portion-wise to the solution. After complete addition, the reaction mixture was stirred at room temperature for 1 hour. Upon completion, as indicated by TLC, the reaction mixture was diluted with water (100 mL) and extracted with EtOAc (2 x 300 mL). The organic phase was dried over  $\text{Na}_2\text{SO}_4$ , filtered, and concentrated under reduced pressure. The crude residue was subjected to flash chromatography on silica gel, eluting with 0-10% ethyl acetate in hexanes, yielding aldehyde compound (+)-**7** (12.3 g, 88% yield) as a yellow oil.  $R_f = 0.5$  (ethyl acetate/hexane 1:9);  $[\alpha]_D^{20} = +2.6^\circ$  ( $c = 1.0$  in  $\text{CHCl}_3$ );  $^1\text{H NMR}$  (500 MHz,  $\text{CDCl}_3$ )  $\delta$  9.74 (t,  $J = 1.8$  Hz, 1H), 7.24 (d,  $J = 8.7$  Hz, 2H), 6.87 (d,  $J = 8.7$  Hz, 2H), 4.41 (s, 2H), 3.79 (s, 3H), 3.31 – 3.23 (m, 2H), 2.51 – 2.36 (m, 2H), 1.85 – 1.74 (m, 2H), 1.54 – 1.43 (m, 1H), 0.92 (d,  $J = 6.7$  Hz, 3H);  $^{13}\text{C NMR}$  (126 MHz,  $\text{CDCl}_3$ )  $\delta$  202.8, 159.2, 130.7, 129.2, 113.8, 75.1, 72.8, 55.3, 41.6, 33.1, 26.0, 17.0; **IR** (neat): 2952, 2860, 1725, 1613, 1515, 1250, 1094, 1036, 826 and 761  $\text{cm}^{-1}$ ; **HRMS** (ESI-TOF): calculated for  $\text{C}_{14}\text{H}_{21}\text{O}_3$   $[\text{M}+\text{H}]^+$  237.1485; found: 237.1483. [See NMR spectra](#)

### 2.3. Synthesis of key aldehyde (+)-7 from (-)-3a:

#### (R)-3-Hydroxy-2-methylpropyl acetate [(+)-4b]:

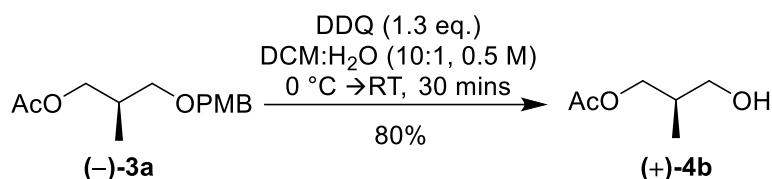

Added 30.0 grams of (*R*)-3-((4-Methoxybenzyl)oxy)-2-methylpropyl acetate (–)-**3a** (119.0 mmol, 1.0 eq.) to a 500 mL RB flask and dissolved it in a mixture of solvents DCM:H<sub>2</sub>O (10:1, 250 mL). Cooled the resulting solution to 0 °C and added 35.0 grams of DDQ (154.0 mmol, 1.3 eq.) portion-wise. Stirred the mixture at room temperature for 30 minutes while monitoring the reaction's progress using TLC. Once the reaction was complete, quenched the mixture with 100 mL of aqueous NaHCO<sub>3</sub>, extracted it with DCM (2 x 500 mL), dried it using Na<sub>2</sub>SO<sub>4</sub>, filtered, and concentrated it under reduced pressure. Purified the crude residue through flash chromatography on silica gel using a gradient of 0-20% ethyl acetate in hexanes. This process yielded compound (+)-**4b** (12.6 grams, 80% yield) as a yellow oil. *R*<sub>f</sub> = 0.3 (ethyl acetate/hexane 2:8); [α]<sup>20</sup><sub>D</sub> = +10.3° (*c* = 1.0 in CHCl<sub>3</sub>); <sup>1</sup>H NMR (400 MHz, CDCl<sub>3</sub>) δ 4.06 (qd, *J* = 11.1, 5.8 Hz, 2H), 3.51 (qd, *J* = 11.1, 5.9 Hz, 2H), 2.06 (s, 3H), 2.03 – 1.92 (m, 1H), 0.94 (d, *J* = 7.0 Hz, 3H); <sup>13</sup>C NMR (101 MHz, CDCl<sub>3</sub>) δ 171.8, 66.3, 64.6, 35.5, 21.0, 13.6; IR (neat): 2967, 1735, 1382, 1259, 1024 and 762 cm<sup>-1</sup>; HRMS (ESI-TOF): calculated for C<sub>6</sub>H<sub>12</sub>O<sub>3</sub>Na [M+Na]<sup>+</sup> 155.0679; found: 155.0678. [See NMR spectra](#)

#### (S)-2-Methyl-3-(tosyloxy)propyl acetate (SI-1):

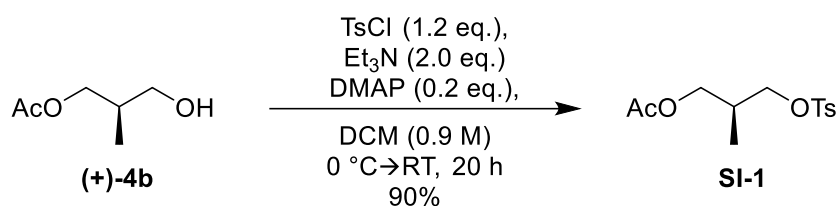

In a dry round-bottom flask, 12.0 grams of alcohol (+)-**4b** (90.8 mmol, 1.0 eq.) was added and dissolved in 100 mL of DCM. The reaction mixture was cooled to 0 °C, and simultaneously, 25.0 mL of triethylamine (180.0 mmol, 2.0 eq.) and 2.2 grams of DMAP (18.0 mmol, 0.2 eq.) were introduced. After 30 minutes at 0 °C, *p*-toluenesulfonyl chloride (21.0 g, 109.0 mmol, 1.2 eq.) was added in portions and stirred at room temperature for 20 hours. Once the reaction was complete, as indicated by TLC, the reaction mixture was quenched with aq. NH<sub>4</sub>Cl (100 mL) and extracted with DCM (2 x 200 mL). The organic layer was dried over Na<sub>2</sub>SO<sub>4</sub>, filtered, and concentrated under reduced pressure. The crude residue underwent purification by flash chromatography on silica gel, eluting with a gradient of 0-10% ethyl acetate in hexanes,

yielding compound **SI-1** (23.5 g, 90% yield) as a colorless oil.  $R_f = 0.6$  (ethyl acetate/hexane 1:9);  $[\alpha]^{20}_D = +4.6^\circ$  ( $c = 1.0$  in  $\text{CHCl}_3$ );  $^1\text{H NMR}$  (400 MHz,  $\text{CDCl}_3$ )  $\delta$  7.77 (d,  $J = 8.4$  Hz, 2H), 7.34 (d,  $J = 8.0$  Hz, 2H), 4.04 – 3.82 (m, 4H), 2.44 (s, 3H), 2.24 – 2.06 (m, 1H), 1.96 (s, 3H), 0.94 (d,  $J = 7.0$  Hz, 3H);  $^{13}\text{C NMR}$  (126 MHz,  $\text{CDCl}_3$ )  $\delta$  170.8, 145.0, 132.9, 130.0, 128.0, 71.4, 65.0, 32.7, 21.7, 20.8, 13.5; **IR** (neat): 2972, 1743, 1367, 1246, 1183, 978, 829 and  $671\text{ cm}^{-1}$ ; **HRMS** (ESI-TOF): calculated for  $\text{C}_{13}\text{H}_{19}\text{O}_5\text{S}$   $[\text{M}+\text{H}]^+$  287.0948; found: 287.0947. [See NMR spectra](#)

**(S)-3-Hydroxy-2-methylpropyl 4-methylbenzenesulfonate (SI-2):**

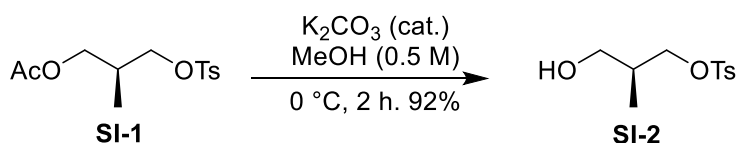

The 500 mL RB flask was charged with (*S*)-2-Methyl-3-(tosyloxy)propyl acetate **SI-1** (21.0 g, 73.4 mmol, 1.0 eq.) and was dissolved in dry methanol (150 mL). The resulting mixture was cooled to  $0\text{ }^\circ\text{C}$ , and a catalytic amount of  $\text{K}_2\text{CO}_3$  was added under a nitrogen atmosphere. Stirring was continued for 2 hours at the same temperature. After the reaction was complete, as indicated by TLC, the solvent was evaporated under reduced pressure at below  $25\text{ }^\circ\text{C}$ . The crude residue was purified by flash chromatography on silica gel, eluting with 0-10% ethyl acetate in hexanes, yielding compound **SI-2** (16.5 g, 92% yield) as a colorless oil.  $R_f = 0.5$  (ethyl acetate/hexane 2:8);  $[\alpha]^{20}_D = +18.4^\circ$  ( $c = 1.0$  in  $\text{CHCl}_3$ );  $^1\text{H NMR}$  (400 MHz,  $\text{CDCl}_3$ )  $\delta$  7.79 (d,  $J = 8.3$  Hz, 2H), 7.35 (d,  $J = 8.0$  Hz, 2H), 4.01 (dd,  $J = 5.7, 1.9$  Hz, 2H), 3.54 (ddd,  $J = 17.6, 11.0, 5.8$  Hz, 2H), 2.45 (s, 3H), 2.05 – 1.94 (m, 1H), 0.91 (d,  $J = 7.0$  Hz, 3H);  $^{13}\text{C NMR}$  (126 MHz,  $\text{CDCl}_3$ )  $\delta$  145.0, 132.9, 130.0, 128.0, 72.1, 63.7, 35.6, 21.7, 13.2; **IR** (neat): 2928, 1359, 1181, 1042, 971, 830 and  $671\text{ cm}^{-1}$ ; **HRMS** (ESI-TOF): calculated for  $\text{C}_{11}\text{H}_{17}\text{O}_4\text{S}$   $[\text{M}+\text{H}]^+$  245.0842; found: 245.0841. [See NMR spectra](#)

**(S)-3-((4-Methoxybenzyl)oxy)-2-methylpropyl 4-methylbenzenesulfonate (5):**

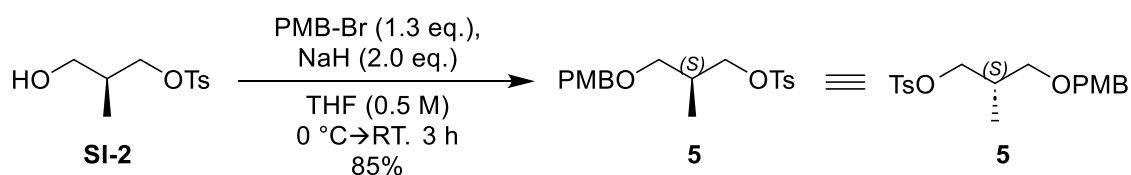

In a 500 mL round-bottom flask (RB), **SI-2** (12.7 g, 52.0 mmol, 1.0 eq.) was charged and dissolved in THF (150 mL). The resulting mixture was cooled to  $0\text{ }^\circ\text{C}$ , then NaH (25.0 g, 104.0 mmol, 2.0 eq.) was added in portion-wise. After stirring for 30 mins at  $0\text{ }^\circ\text{C}$ , PMB-Br (9.0 mL, 67.6 mmol, 1.3 eq. freshly prepared from PMB-OH) in THF solution was added slowly using



an additional funnel at 0 °C over 1 h and after completing the addition, the resulting mixture was stirred at RT for 2 h. Upon completion of the reaction, the mixture was quenched with water (100 mL) at 0 °C and the aqueous layer was extracted with EtOAc (2 x 200 mL). The combined organic layers were dried over Na<sub>2</sub>SO<sub>4</sub> and concentrated under reduced pressure. The obtained crude residue was purified by flash chromatography on silica gel eluting with 0-10% ethyl acetate in hexanes to afford compound **5** (32.1 g, 85% yield) as a colorless oil; *R<sub>f</sub>* = 0.5 (ethyl acetate/hexane 2:8); [ $\alpha$ ]<sup>20</sup><sub>D</sub> = +5.8° (*c* = 0.5 in CHCl<sub>3</sub>) [Specific rotation for same fragment synthesized from (+)-**4a** [ $\alpha$ ]<sup>20</sup><sub>D</sub> = +5.2° (*c* = 0.5 in CHCl<sub>3</sub>)]; The other spectroscopic data is compared to that of the previously synthesized compound **5** (see page S-4). [See NMR spectra](#)

#### 2.4. Synthesis of Julia-Kocienski olefination partner fragment-19:

##### (4*S*,7*R*)-8-((4-Methoxybenzyl)oxy)-7-methyloct-1-en-4-ol (**8**):

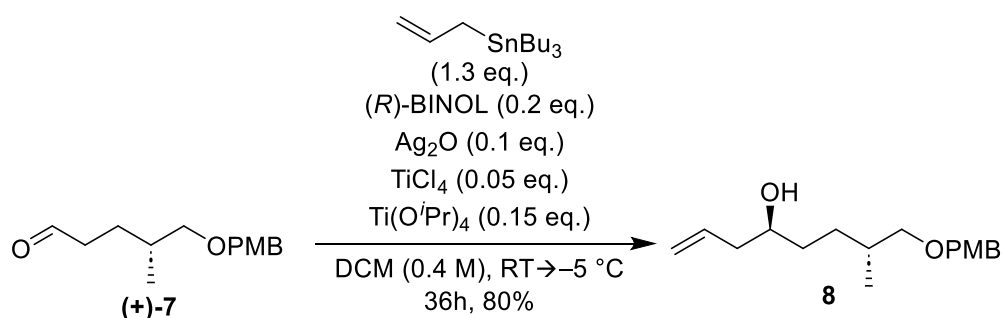

Under a nitrogen atmosphere, a 500 mL reaction flask was charged with 4.3 mL of TiCl<sub>4</sub> (4.24 mmol, 0.05 eq.) dissolved in 100 mL of DCM. The solution was cooled to 0 °C, and then 3.9 mL of Ti(O<sup>*i*</sup>Pr)<sub>4</sub> (12.7 mmol, 0.15 eq.) was added. The mixture was then warmed to room temperature and stirred for 1 hour. Ag<sub>2</sub>O (2.0 g, 8.5 mmol, 0.1 eq.) was added at room temperature and the mixture was stirred for 5 h in the dark. At this point, a solution of (*R*)-BINOL (4.9 g, 17.0 mmol, 0.2 eq.) in 150 mL of DCM was added to the reaction mixture, and stirring was continued for an additional 2 hours. The mixture was cooled to -15 °C, and a DCM (50 mL) solution of aldehyde (+)-**7** (20.0 g, 85.0 mmol, 1.0 eq.) and allyl tributyltin (34.3 mL, 110 mmol, 1.3 eq.) were sequentially added. The mixture was allowed to warm to -5 °C and stirred for 24 hours. Following TLC confirmation, the reaction mixture was quenched with saturated aq. NaHCO<sub>3</sub>, and extracted with DCM (2 x 400 mL). The organic extracts were dried over Na<sub>2</sub>SO<sub>4</sub> and evaporated. The residue was purified by column chromatography on silica gel (using EtOAc/Hexane 1:9) resulted in the isolation of compound **8** as a colorless oil (18.8 g, 80% yield, 95:5 *dr.* & major isomer enantiomeric ratio (*er*): 94.7:5.3); *R<sub>f</sub>* = 0.5 (ethyl acetate/hexane 2:8); [ $\alpha$ ]<sup>20</sup><sub>D</sub> = -0.4° (*c* = 1.0 in CHCl<sub>3</sub>); <sup>1</sup>H NMR (400 MHz, CDCl<sub>3</sub>)  $\delta$  7.25 (d, *J* = 8.6 Hz, 2H), 6.87 (d, *J* = 8.7 Hz, 2H), 5.90 – 5.75 (m, 1H), 5.17 – 5.12 (m, 1H), 5.12 – 5.09 (m, 1H), 4.42 (s, 2H), 3.80 (s, 3H), 3.65 – 3.56 (m, 1H), 3.33 – 3.19 (m, 2H), 2.34 – 2.24 (m,

1H), 2.19 – 2.07 (m, 1H), 1.82 – 1.71 (m, 2H), 1.54 – 1.47 (m, 1H), 1.46 – 1.40 (m, 1H), 1.23 – 1.11 (m, 1H), 0.93 (d,  $J = 6.7$  Hz, 3H);  $^{13}\text{C}$  NMR (101 MHz,  $\text{CDCl}_3$ )  $\delta$  159.2, 135.0, 130.9, 129.3, 118.2, 113.8, 75.5, 72.8, 71.1, 55.4, 41.9, 34.2, 33.6, 29.7, 17.3; **IR** (neat): 2959, 2895, 1469, 1375, 1253, 1094 and 761  $\text{cm}^{-1}$ ; **HRMS** (ESI-TOF): calculated for  $\text{C}_{17}\text{H}_{26}\text{O}_3\text{Na}$   $[\text{M}+\text{Na}]^+$  301.1774; found: 301.1771. [See NMR spectra](#)

### HPLC Report of compound 8.

The enantiomeric ratio (*er.*) was determined by chiral stationary phase HPLC using a Daicel Chiralpak AD-H column (250 x 4.6 mm) (hexane/2-propanol = 93:07, flow rate 1.0 mL/min,  $\lambda = 280$  nm),  $t_R = 11.6$  min (minor),  $t_R = 14.1$  min (major).

Sample Name : SCS-PG-RACEMIC  
 Sample ID : SCS-PG-RACEMIC  
 Vial # : 67  
 Injection Volume : 10  $\mu\text{L}$   
 Data File Name : 03032023.1.lcd  
 Method File Name : 03032023.lcm  
 Report File Name : HPLC Report.lcr  
 Data Acquired : 3/3/2023 9:58:59 AM  
 Data Processed : 3/3/2023 10:29:02 AM  
 Chromatographic Conditions: COLUMN : CHIRALPAK AD-H 250 X 4.6mm 5 $\mu$   
 MOBILE PHASE : 7% IPA IN HEXANE  
 FLOW RATE : 1ml/min

Sample Name : SCS-PG-CHIRAL  
 Sample ID : SCS-PG-CHIRAL  
 Vial # : 68  
 Injection Volume : 10  $\mu\text{L}$   
 Data File Name : 03032023.2.lcd  
 Method File Name : 03032023.lcm  
 Report File Name : HPLC Report.lcr  
 Data Acquired : 3/3/2023 10:29:32 AM  
 Data Processed : 3/3/2023 11:07:52 AM  
 Chromatographic Conditions: COLUMN : CHIRALPAK AD-H 250 X 4.6mm 5 $\mu$   
 MOBILE PHASE : 7% IPA IN HEXANE  
 FLOW RATE : 1ml/min

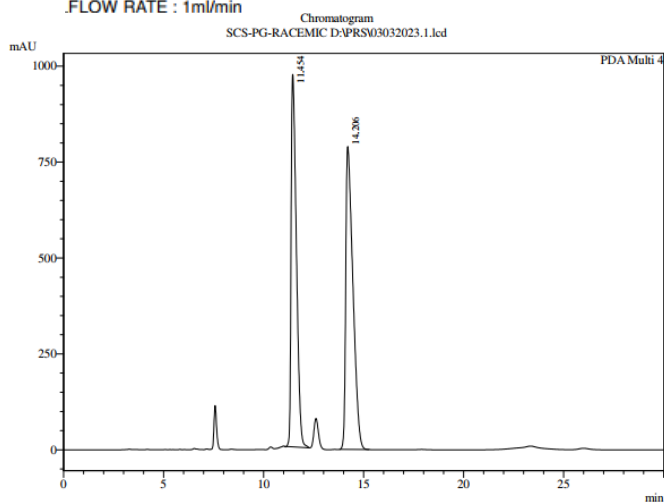

1 PDA Multi 4 / 280nm 4nm

PeakTable

| Peak# | Ret. Time | Area     | Height  | Area %  | Height % |
|-------|-----------|----------|---------|---------|----------|
| 1     | 11.454    | 17722209 | 971098  | 47.349  | 55.143   |
| 2     | 14.206    | 19706423 | 789969  | 52.651  | 44.857   |
| Total |           | 37428632 | 1761067 | 100.000 | 100.000  |

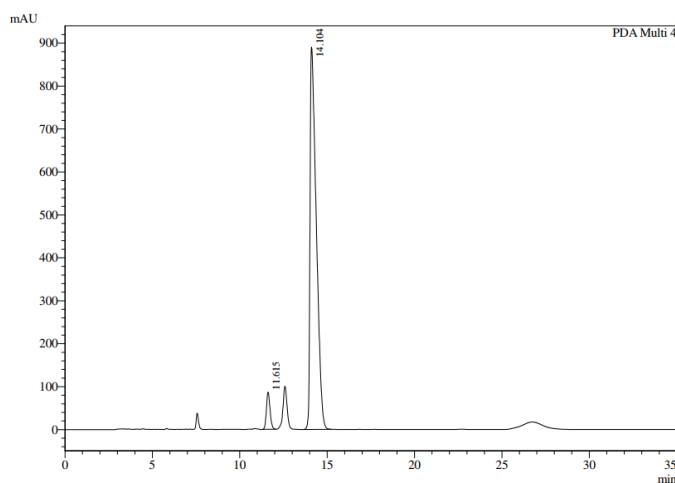

1 PDA Multi 4 / 280nm 4nm

PeakTable

| Peak# | Ret. Time | Area     | Height | Area %  | Height % |
|-------|-----------|----------|--------|---------|----------|
| 1     | 11.615    | 1245992  | 86358  | 5.346   | 8.844    |
| 2     | 14.104    | 22062921 | 890073 | 94.654  | 91.156   |
| Total |           | 23308912 | 976431 | 100.000 | 100.000  |

**Figure S4:** HPLC report of diastereomeric 8

**Figure S5:** HPLC report of Chiral 8

## Mosher ester analysis on compound 8:

**Figure-S6:**  $\Delta\delta$  ( $= \delta_S - \delta_R$ ) data for the *S*- and *R*-MTPA- Mosher ester's **SI-3** and **SI-4**

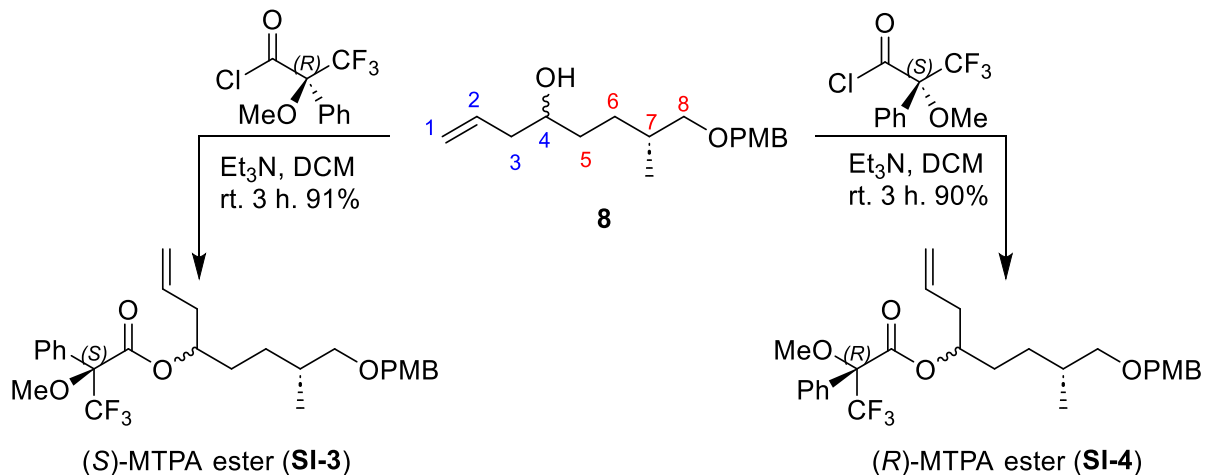

|   | $\delta$ <i>S</i> ester (ppm) | $\delta$ <i>R</i> ester (ppm) | $\Delta\delta^{SR}$ ( $= \delta_S - \delta_R$ ) (ppm) |
|---|-------------------------------|-------------------------------|-------------------------------------------------------|
| 1 | 5.11, 5.07                    | 5.02, 4.98                    | 0.02, 0.01                                            |
| 2 | 5.74                          | 5.61                          | 0.06                                                  |
| 3 | 2.40                          | 2.33                          | 0.07                                                  |
| 4 | 5.11                          | 5.12                          | -0.01                                                 |
| 5 | 1.51                          | 1.63                          | -0.12                                                 |
| 6 | 1.25, 0.94                    | 1.51, 1.14                    | -0.26, -0.2                                           |
| 7 | 1.57                          | 1.72                          | -0.15                                                 |
| 8 | 3.07                          | 3.22                          | -0.15                                                 |

Precisely, protons that have positive  $\Delta\delta_{SR}$  values reside within R<sub>1</sub> and the protons with negative values belong to R<sub>2</sub>. According to this allylic side chain resides within R<sub>1</sub> (due to its positive  $\Delta\delta_{SR}$  values) and the linear saturated fragment belongs to R<sub>2</sub> *i.e.* on the opposite side of that plane (**Figure-S6**).

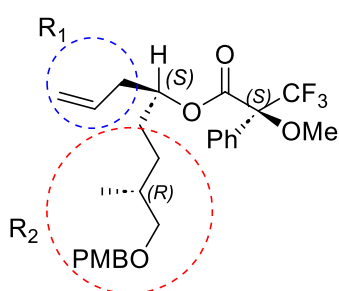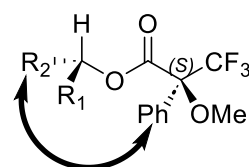

Phenyl group shielding effect results upfield chemical shift for the protons belong to R<sub>2</sub>

**(4*S*,7*R*)-8-((4-Methoxybenzyl)oxy)-7-methyloct-1-en-4-yl (*S*)-3,3,3-trifluoro-2-methoxy-2-phenylpropanoate (SI-3):**

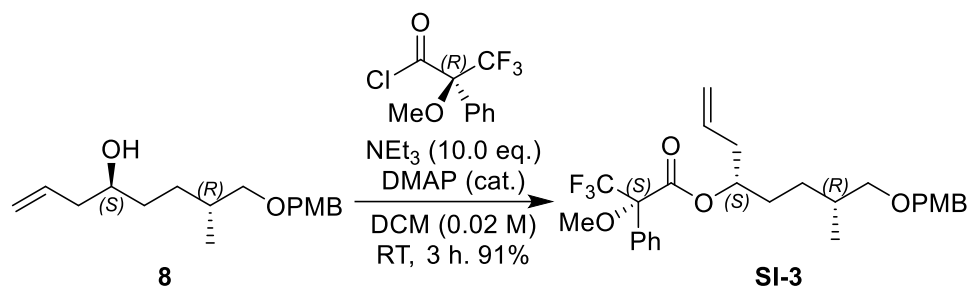

The flame-dried RB flask was charged with 2° alcohol **8** (10.0 mg, 0.036 mmol, 1.0 eq.) and dissolved in DCM (2.0 mL). To this solution, triethylamine (51.0  $\mu$ L, 0.36 mmol, 10.0 eq.) and a catalytic amount of DMAP were added. Subsequently, (*R*)-(-)-MTPA-Cl (10.5  $\mu$ L, 0.054 mmol, 1.5 eq.) was introduced, and the reaction mixture was stirred for 3 hours at room temperature. After completion, the reaction mixture was quenched with a saturated aq.  $\text{NH}_4\text{Cl}$  solution and extracted with DCM (2 x 5 mL). The organic extracts were then dried over  $\text{Na}_2\text{SO}_4$ . Upon solvent evaporation, purification of the residue by column chromatography on silica gel (ethyl acetate/hexane 1:9) yielded compound **SI-3** as a yellow oil (16.3 mg, 91% yield);  $R_f = 0.7$  (ethyl acetate/hexane 1:9)  $[\alpha]^{20}_{\text{D}} = -23.6^\circ$  ( $c = 1.0$  in  $\text{CHCl}_3$ );  $^1\text{H NMR}$  (400 MHz,  $\text{CDCl}_3$ )  $\delta$  7.58 – 7.53 (m, 2H), 7.43 – 7.33 (m, 3H), 7.24 (d,  $J = 8.6$  Hz, 2H), 6.88 (d,  $J = 8.7$  Hz, 2H), 5.78 – 5.67 (m, 1H), 5.20 – 5.10 (m, 2H), 5.09 (s, 1H), 4.39 (s, 2H), 3.81 (s, 3H), 3.56 (d,  $J = 1.0$  Hz, 3H), 3.23 – 3.13 (m, 2H), 2.46 – 2.38 (m, 2H), 1.70 – 1.54 (m, 3H), 1.41 – 1.25 (m, 1H), 1.08 – 0.98 (m, 1H), 0.85 (d,  $J = 6.7$  Hz, 3H);  $^{13}\text{C NMR}$  (101 MHz,  $\text{CDCl}_3$ )  $\delta$  166.3, 159.2, 133.3, 132.6, 130.8, 129.6, 129.2, 128.4, 127.5, 123.5 (q,  $J = 286.8$  Hz), 118.5, 113.8, 84.6 (q,  $J = 27.3$  Hz), 76.8, 75.3, 72.7, 55.7, 55.3, 38.3, 33.3, 30.8, 28.9, 17.2;  $^{19}\text{F NMR}$  (376 MHz,  $\text{CDCl}_3$ )  $\delta$  -71.27; **IR** (neat): 2951, 2859, 1748, 1258, 1179, 1111 and 764  $\text{cm}^{-1}$ ; **HRMS** (ESI-TOF): calculated for  $\text{C}_{27}\text{H}_{33}\text{O}_5\text{F}_3\text{Na}$   $[\text{M}+\text{Na}]^+$  517.2172; found: 517.2168. [See NMR spectra](#)

**(4*S*,7*R*)-8-((4-Methoxybenzyl)oxy)-7-methyloct-1-en-4-yl (*R*)-3,3,3-trifluoro-2-methoxy-2-phenylpropanoate (SI-4):**

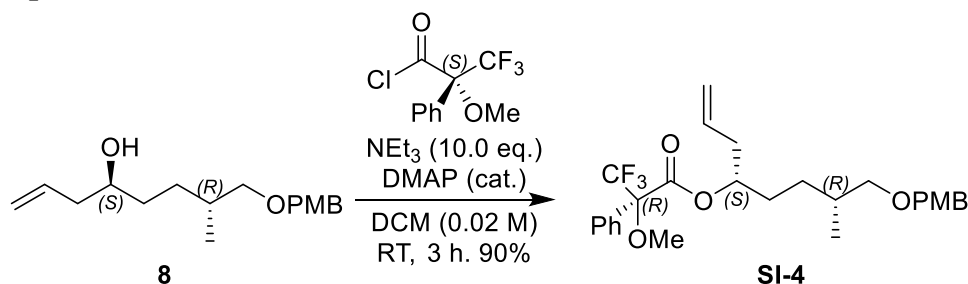

The flame-dried RB flask was charged 2° alcohol **8** (10.0 mg, 0.036 mmol, 1.0 eq.) and dissolved in DCM (2.0 mL). To this mixture triethylamine (51.0  $\mu$ L, 0.36 mmol, 10.0 eq.) and a catalytic amount of DMAP were added. Subsequently, (*S*)-(+)-MTPA-Cl (10.5  $\mu$ L, 0.054 mmol, 1.5 eq.) was introduced, and the reaction mixture was stirred for 3 hours at room temperature. Upon completion, the reaction mixture was quenched with a saturated aq.  $\text{NH}_4\text{Cl}$  solution and extracted with DCM (2 x 5 mL). The organic extracts were then dried over  $\text{Na}_2\text{SO}_4$ . After evaporating the solvents, purification of the residue by column chromatography on silica gel (ethyl acetate/hexane 1:9) afforded compound **SI-4** as a yellow oil (16.0 mg, 90% yield);  $R_f = 0.7$  (ethyl acetate/hexane 1:9);  $[\alpha]_D^{20} = +10.0^\circ$  ( $c = 1.0$  in  $\text{CHCl}_3$ );  $^1\text{H NMR}$  (400 MHz,  $\text{CDCl}_3$ )  $\delta$  7.60 – 7.50 (m, 2H), 7.41 – 7.35 (m, 3H), 7.24 (d,  $J = 8.6$  Hz, 2H), 6.87 (d,  $J = 8.7$  Hz, 2H), 5.71 – 5.55 (m, 1H), 5.19 – 5.07 (m, 1H), 5.06 – 5.01 (m, 1H), 4.99 (s, 1H), 4.41 (s, 2H), 3.80 (s, 3H), 3.53 (d,  $J = 1.1$  Hz, 3H), 3.23 (d,  $J = 6.2$  Hz, 2H), 2.36 – 2.32 (m, 2H), 1.80 – 1.58 (m, 3H), 1.56 – 1.48 (m, 1H), 1.21 – 1.09 (m, 1H), 0.90 (d,  $J = 6.7$  Hz, 3H);  $^{13}\text{C NMR}$  (126 MHz,  $\text{CDCl}_3$ )  $\delta$  165.3, 158.2, 131.9, 131.5, 129.8, 128.6, 128.3, 127.4, 126.6, 122.5 (q,  $J = 289.7$  Hz), 117.5, 112.9, 83.7 (q,  $J = 27.6$  Hz), 75.9, 74.3, 71.8, 54.6, 54.4, 37.0, 32.4, 29.8, 28.3, 16.2;  $^{19}\text{F NMR}$  (376 MHz,  $\text{CDCl}_3$ )  $\delta$  -71.28; **IR** (neat): 2951, 2859, 1748, 1258, 1179, 1111 and 764  $\text{cm}^{-1}$ ; **HRMS** (ESI-TOF): calculated for  $\text{C}_{27}\text{H}_{33}\text{O}_5\text{F}_3\text{Na}$   $[\text{M}+\text{Na}]^+$  517.2172; found: 517.2169. [See NMR spectra](#)

**tert-Butyl(((4*S*,7*R*)-8-((4-methoxybenzyl)oxy)-7-methyloct-1-en-4-yl)oxy)dimethylsilane (9):**

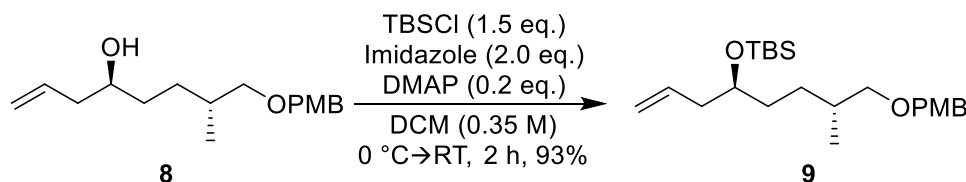

The flame-dried RB flask was charged with 2° Alcohol **8** (10.0 g, 36.0 mmol, 1.0 eq.) and dissolved in 100 mL of DCM. The mixture was cooled to 0 °C, and then Imidazole (5.0 g, 73.5 mmol, 2.0 eq.) and DMAP (0.9 g, 7.3 mmol, 0.2 eq.) were added simultaneously. After 10 mins, TBS-Cl (8.3 g, 55.0 mmol, 1.5 eq.) was introduced, and stirred the reaction mixture at room temperature for 2 h. Upon completion, the reaction mixture was quenched with water, and the compound was extracted with DCM (2 x 200 mL). The organic extracts were combined and dried over  $\text{Na}_2\text{SO}_4$ . Evaporation of solvents and purification of the residue by column chromatography on silica gel (EtOAc/Hexane 0-5%) yielded compound **9** as a greenish oil (13.0 g, 93% yield);  $R_f = 0.8$  (ethyl acetate/hexane 5:95);  $[\alpha]_D^{20} = -7.5^\circ$  ( $c = 1.0$  in  $\text{CHCl}_3$ );  $^1\text{H NMR}$  (400 MHz,  $\text{CDCl}_3$ )  $\delta$  7.26 (d,  $J = 8.6$  Hz, 2H), 6.88 (d,  $J = 8.7$  Hz, 2H), 5.86 – 5.74 (m, 1H), 5.07 – 5.02 (m, 1H), 5.01 (s, 1H), 4.43 (dd,  $J = 11.6, 13.6$  Hz, 2H), 3.81 (s, 3H), 3.73 –

3.61 (m, 1H), 3.29 (dd,  $J = 9.1, 6.1$  Hz, 1H), 3.21 (dd,  $J = 9.0, 6.7$  Hz, 1H), 2.30 – 2.14 (m, 2H), 1.78 – 1.67 (m, 1H), 1.57 – 1.33 (m, 3H), 1.14 – 1.02 (m, 1H), 0.91 (d,  $J = 6.7$  Hz, 3H), 0.89 (s, 9H), 0.045 (s, 3H), 0.042 (s, 3H);  $^{13}\text{C NMR}$  (101 MHz,  $\text{CDCl}_3$ )  $\delta$  159.2, 135.6, 131.0, 129.2, 116.7, 113.8, 75.8, 72.8, 72.3, 55.4, 41.9, 34.2, 33.7, 29.4, 26.1, 18.3, 17.4, -4.2, -4.3; **IR** (neat): 2945, 2860, 1515, 1464, 1252, 1094, 835 and 771  $\text{cm}^{-1}$ ; **HRMS** (ESI-TOF): calculated for  $\text{C}_{23}\text{H}_{40}\text{O}_3\text{SiNa}$   $[\text{M}+\text{Na}]^+$  415.2639; found: 415.2636. [See NMR spectra](#)

**(3*S*,6*R*)-3-((*tert*-Butyldimethylsilyl)oxy)-7-((4-methoxybenzyl)oxy)-6-methylheptanal**  
**[(+)-10]:**

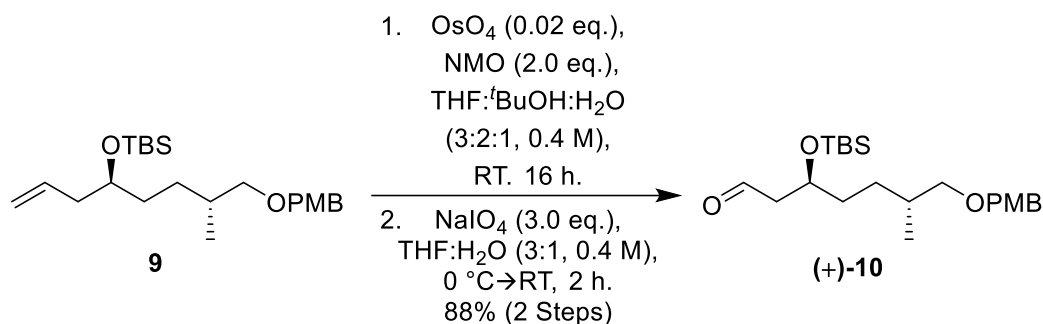

Alkene **9** (13.0 g, 33.0 mmol, 1.0 eq.) was charged into a round-bottom flask, dissolved in THF (90 mL) and treated with  $t$ BuOH (45 mL), water (15 mL), NMO (7.76 g, 66.0 mmol, 2.0 eq.), and  $\text{OsO}_4$  (0.016 M in toluene, 100 mL, 1.65 mmol, 0.02 eq.) sequentially. After being stirred for 16 h at room temperature, the reaction mixture was quenched with saturated aq.  $\text{Na}_2\text{S}_2\text{O}_3 \cdot 5\text{H}_2\text{O}$  (100 mL) and diluted with EtOAc (100 mL). Stirring was continued for an additional 2 h. The layers were separated and the organic layer was washed with brine (100 mL), dried over  $\text{Na}_2\text{SO}_4$ , filtered, and concentrated in vacuo to afford a corresponding crude diol.

The above crude diol was taken into THF: $\text{H}_2\text{O}$  (3:1, 160 mL) and at 0  $^\circ\text{C}$ ,  $\text{NaIO}_4$  (21.5 g, 99 mmol, 3.0 eq.) was added. the reaction mixture was warmed to RT and stirred for 1 h. After complete consumption of diol, the reaction mixture was diluted with water (100 mL) and extracted with EtOAc (2 x 200 mL), dried over  $\text{Na}_2\text{SO}_4$ , filtered and concentrated under reduced pressure. The crude residue was purified by flash chromatography on silica gel eluting with 0-10% ethyl acetate in hexanes to afford compound **(+)-10** (11.4 g, 88% yield) as a yellow oil.  $R_f = 0.5$  (ethyl acetate/hexane 1:9);  $[\alpha]_D^{20} = +5.2^\circ$  ( $c = 1.0$  in  $\text{CHCl}_3$ );  $^1\text{H NMR}$  (400 MHz,  $\text{CDCl}_3$ )  $\delta$  9.75 (t,  $J = 2.5$  Hz, 1H), 7.20 (d,  $J = 8.7$  Hz, 2H), 6.83 (d,  $J = 8.7$  Hz, 2H), 4.37 (s, 2H), 4.11 (dd,  $J = 7.3, 4.2$  Hz, 1H), 3.75 (s, 3H), 3.25 – 3.14 (m, 2H), 2.45 (dd,  $J = 5.7, 2.5$  Hz, 2H), 1.76 – 1.63 (m, 1H), 1.58 – 1.40 (m, 3H), 1.12 – 0.97 (m, 1H), 0.86 (d,  $J = 6.7$  Hz, 3H), 0.82 (s, 9H), 0.01 (d,  $J = 6.3$  Hz, 6H);  $^{13}\text{C NMR}$  (101 MHz,  $\text{CDCl}_3$ )  $\delta$  202.5, 159.2, 130.9, 129.3, 113.9, 75.5, 72.8, 68.6, 55.4, 50.8, 35.2, 33.6, 29.2, 25.9, 18.1, 17.2, -4.2, -4.6; **IR** (neat):

2945, 2860, 2760, 1515, 1464, 1252, 1094, 835 and 771 $\text{cm}^{-1}$ ; **HRMS** (ESI-TOF): calculated for  $\text{C}_{22}\text{H}_{38}\text{O}_4\text{SiNa}$   $[\text{M}+\text{Na}]^+$  417.2432; found: 417.2431. [See NMR spectra](#)

### 1-(3-(Methoxymethoxy)phenyl)propan-1-one (SI-6):

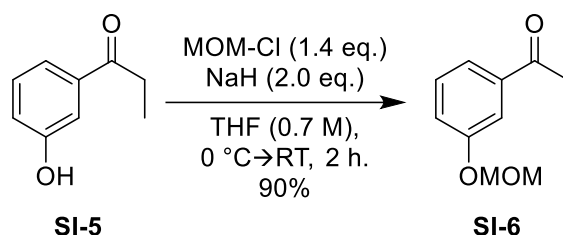

A flame-dried round-bottom flask was charged with 1-(3-hydroxyphenyl)propan-1-one **SI-5** (5.0 g, 33.0 mmol, 1.0 eq.) and dissolved in THF (50 mL). The mixture was cooled to 0 °C, and NaH (60%, 1.6 g, 66.0 mmol, 2.0 eq.) was added portion-wise. After being stirred for 30 minutes at 0 °C, MOM-Cl (3.6 mL, 47.0 mmol, 1.4 eq.) was added dropwise. The resulting mixture was stirred for 2 h at room temperature, and then the mixture was quenched with ice and diluted with EtOAc. The layers were separated, and the aqueous layer was further extracted with EtOAc (2 x 150 mL). Combined organic layers were dried over  $\text{Na}_2\text{SO}_4$ , filtered, and concentrated under reduced pressure. The crude residue was purified by flash chromatography on silica gel, eluting with 0-10% ethyl acetate in hexanes to afford compound **SI-6** (5.8 g, 90% yield) as a red oil.  $R_f = 0.5$  (ethyl acetate/hexane 1:9);  **$^1\text{H NMR}$**  (500 MHz,  $\text{CDCl}_3$ )  $\delta$  7.62 – 7.58 (m, 2H), 7.36 (t,  $J = 7.9$  Hz, 1H), 7.22 (ddd,  $J = 8.2, 2.5, 0.9$  Hz, 1H), 5.21 (s, 2H), 3.48 (s, 3H), 2.98 (q,  $J = 7.2$  Hz, 2H), 1.21 (t,  $J = 7.2$  Hz, 3H);  **$^{13}\text{C NMR}$**  (126 MHz,  $\text{CDCl}_3$ )  $\delta$  200.5, 157.5, 138.5, 129.7, 121.7, 121.0, 115.6, 94.5, 56.2, 32.0, 8.4; **IR** (neat): 3065, 2976, 1681, 1571, 1451, 1311, 1228, 1099 and 950  $\text{cm}^{-1}$ ; **HRMS** (ESI-TOF): calculated for  $\text{C}_{11}\text{H}_{14}\text{O}_3\text{Na}$   $[\text{M}+\text{Na}]^+$  217.0831; found: 217.0828. [See NMR spectra](#)

### (5*S*,8*R*)-5-((*tert*-Butyldimethylsilyl)oxy)-3-hydroxy-9-((4-methoxybenzyl)oxy)-2,8-dimethyl-1-phenylnonan-1-one (12):

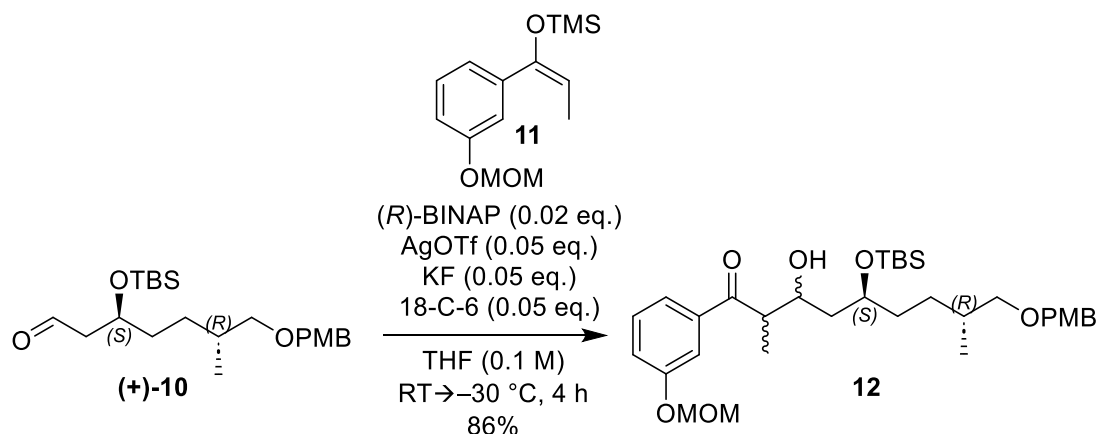

**Optimization Table:**

| Sl. no | Reaction condition                                                           | Yield | Comments                         |
|--------|------------------------------------------------------------------------------|-------|----------------------------------|
| 1.     | TiCl <sub>4</sub> , DIPEA, DCM, -78 °C, 2h                                   | 83%   | dr. 1:1                          |
| 2.     | ( <i>R</i> )- BINAP, AgOTf, KF, 18-Crown -6-ether, THF, rt. to -78 °C, 12h   | 33%   | dr. 4:1<br>SM not fully consumed |
| 3.     | ( <i>R</i> )- BINAP, AgOTf, KF, 18-Crown -6-ether, THF, rt. to -30 °C, 4h    | 86%   | dr. 4:1<br>SM fully consumed     |
| 4.     | ( <i>R</i> )- T-BINAP, AgOTf, KF, 18-Crown -6-ether, THF, rt. to -30 °C, 12h | 64%   | dr. 4:1<br>SM not fully consumed |
| 5.     | ( <i>R</i> )- T-BINAP, AgOTf, KF, 18-Crown -6-ether, THF, 0 °C, 12h          | 89%   | dr. 1:1                          |

A flame-dried 50 mL round-bottom was charged with AgOTf (16.0 mg, 0.063 mmol, 0.05 eq.), (*R*)-BINAP (16.0 mg, 0.025 mmol, 0.02 eq.), KF (3.7 mg, 0.063 mmol, 0.05 eq.), and 18-Crown-6-ether (17.0 mg, 0.063 mmol, 0.05 eq.) and dissolved the mixture in dry THF (5 mL). This resultant mixture was shielded from light and stirred for 20 minutes at room temperature. Subsequently, the reaction mixture was cooled down to -30 °C, aldehyde (+)-**10** (0.5 g, 1.27 mmol, 1.0 eq.) in THF (3 mL) followed by TMS enolate **11** (prepared in situ using the reported procedure)<sup>2</sup> in THF (2 mL) was added. The resulting mixture was stirred for 4 hours at -30 °C, then quenched with water. After filtration through a celite pad, the compound was extracted with EtOAc (2 x 20 mL), dried over Na<sub>2</sub>SO<sub>4</sub>, filtered, and concentrated under reduced pressure. The crude residue was purified by flash chromatography on silica gel eluting with 0-15% ethyl acetate in hexanes to afford compound **12** (640 mg, 86% yield, *dr* = 4:1) as a colorless oil. *R<sub>f</sub>* = 0.5 (ethyl acetate/hexane 2:8);  $[\alpha]_D^{20} = +10.0^\circ$  (*c* = 0.2 in CHCl<sub>3</sub>); <sup>1</sup>H NMR (400 MHz, CDCl<sub>3</sub>, inseparable diastereomeric mixture) (major isomer)  $\delta$  7.64 – 7.54 (m, 2H), 7.41 – 7.33 (m, 1H), 7.28 – 7.21 (m, 3H), 6.90 – 6.83 (m, 2H), 5.21 (s, 2H), 4.46 – 4.37 (m, 2H), 4.32 – 4.20 (m, 1H), 3.99 – 3.88 (m, 1H), 3.79 (s, 3H), 3.57– 3.50 (m, 1H), 3.49 (s, 3H), 3.32 – 3.15 (m, 2H), 1.78 – 1.58 (m, 3H), 1.58 – 1.39 (m, 3H), 1.27 (d, *J* = 7.08 Hz, 3H), 1.14 – 1.01 (m, 1H), 0.93 (d, *J* = 6.8 Hz, 3H), 0.91 – 0.84 (m, 9H), 0.12 – 0.03 (m, 6H); <sup>13</sup>C NMR (101 MHz, CDCl<sub>3</sub>, inseparable diastereomeric mixture) (major isomer)  $\delta$  204.4, 159.2, 157.7, 138.0, 130.9, 129.8, 129.3, 122.1, 121.3, 116.0, 113.8, 94.6, 75.8, 72.8, 71.2, 69.0, 56.3, 55.4, 46.7, 39.7, 34.1, 33.7, 29.3, 26.0, 18.1, 17.2, 12.9, -4.37, -4.63; IR (neat): 2942, 2861, 1861, 1597, 1464, 1253, 1087, 834 and 767 cm<sup>-1</sup>; HRMS (ESI-TOF): calculated for C<sub>33</sub>H<sub>53</sub>O<sub>7</sub>Si [M+H]<sup>+</sup> 589.3555; found: 589.3549. [See NMR spectra](#)



**Summarising Table for conversion of 13 from 12:**

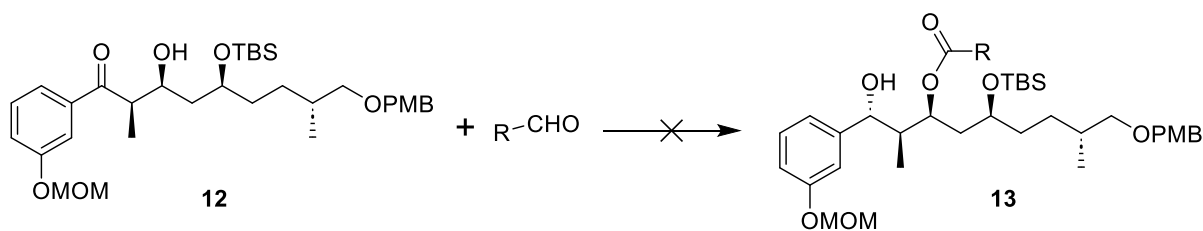

| Sl. No | Reaction Conditions                                             | Aldehyde            | Remark                                |
|--------|-----------------------------------------------------------------|---------------------|---------------------------------------|
| 1.     | SmI <sub>2</sub> , THF, -20 °C                                  | CH <sub>3</sub> CHO | 0 % conversion, complete SM recovered |
| 2.     | SmI <sub>2</sub> , THF, 0 °C                                    | CH <sub>3</sub> CHO | 0 % conversion, complete SM recovered |
| 3.     | SmI <sub>2</sub> , THF, -20 °C                                  | Propionaldehyde     | 0 % conversion, complete SM recovered |
| 4.     | SmI <sub>2</sub> , THF, -20 °C                                  | Benzaldehyde        | 0 % conversion, complete SM recovered |
| 5.     | Sc(OTf) <sub>3</sub> , THF, -20 °C                              | CH <sub>3</sub> CHO | 0 % conversion, complete SM recovered |
| 6.     | Zr[OC(CH <sub>3</sub> ) <sub>3</sub> ] <sub>4</sub> , THF, 0 °C | CH <sub>3</sub> CHO | 0 % conversion, complete SM recovered |

**(R)-4-Benzyl-3-((2R,3S,5S,8R)-5-((tert-butyl dimethylsilyl)oxy)-3-hydroxy-9-((4-methoxybenzyl)oxy)-2,8-dimethylnonanoyl)oxazolidin-2-one (15):**

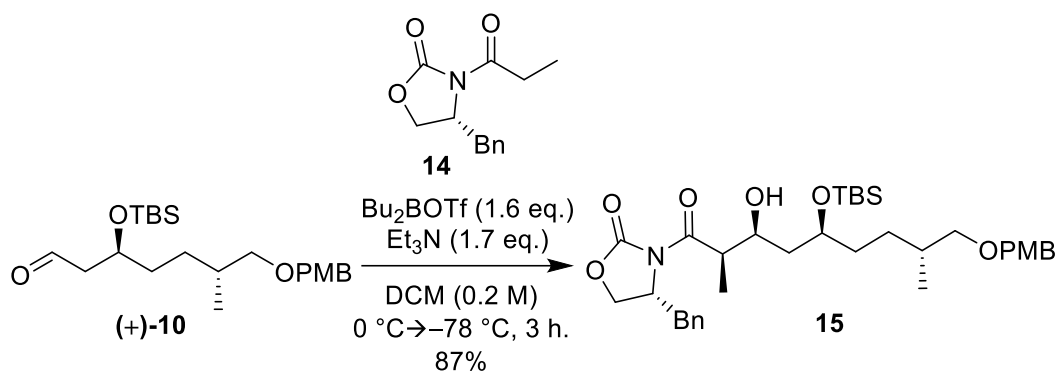

In a round-bottom flask, compound **14**<sup>3</sup> (5.0 g, 21.4 mmol, 1.0 equiv.) was dissolved in dry DCM (50 mL) and chilled to 0 °C. Bu<sub>2</sub>BOTf (1.0 M in DCM, 34.3 mL, 34.3 mmol, 1.6 equiv.) was subsequently added dropwise, leading to the formation of a brown reaction mixture. Triethylamine (5.2 mL, 36.5 mmol, 1.7 equiv.) was added dropwise. After stirring for 45 minutes, the reaction mixture was cooled down to -78 °C, and aldehyde (+)-**10** (11.0 g, 27.9 mmol, 1.3 equiv.) in DCM (60 mL) was added slowly over a period of 30 minutes. The reaction mixture was then allowed to stir at -78 °C for 3 hours and at 0 °C for 1 hour before phosphate

buffer (pH=7) and MeOH (1:1) were added simultaneously. The mixture was again cooled down to -10 °C, then 30% solution of H<sub>2</sub>O<sub>2</sub> was added, and the solution was stirred at 0 °C for 30 minutes. After treating the reaction mixture with aq. Na<sub>2</sub>S<sub>2</sub>O<sub>3</sub>, the organic compound was extracted with diethyl ether (2 x 200 mL), dried over Na<sub>2</sub>SO<sub>4</sub>, filtered, and concentrated under reduced pressure. Finally, the crude residue was purified by flash chromatography on silica gel eluting with 10-15% ethyl acetate in hexanes to afford compound **15** (11.7 g, 87% yield, single diastereomer) as a colorless oil.  $R_f = 0.3$  (ethyl acetate/hexane 2:8);  $[\alpha]_D^{20} = -20.5^\circ$  ( $c = 1.0$  in CHCl<sub>3</sub>); <sup>1</sup>H NMR (500 MHz, CDCl<sub>3</sub>)  $\delta$  7.36 – 7.31 (m, 2H), 7.30 – 7.23 (m, 3H), 7.23 – 7.19 (m, 2H), 6.87 (d,  $J = 8.7$  Hz, 2H), 4.74 – 4.64 (m, 1H), 4.42 (s, 2H), 4.20 – 4.13 (m, 2H), 4.12 – 4.04 (m, 1H), 4.01 – 3.85 (m, 1H), 3.79 (s, 3H), 3.79 – 3.74 (m, 1H), 3.40 (s, 1H), 3.32 – 3.19 (m, 3H), 2.77 (dd,  $J = 13.4, 9.6$  Hz, 1H), 1.78 – 1.54 (m, 4H), 1.51 – 1.40 (m, 2H), 1.27 (d,  $J = 7.0$  Hz, 3H), 1.19 – 1.09 (m, 1H), 0.92 (d,  $J = 6.7$  Hz, 3H), 0.88 (s, 9H), 0.08 (d,  $J = 2.6$  Hz, 6H); <sup>13</sup>C NMR (126 MHz, CDCl<sub>3</sub>)  $\delta$  176.5, 159.2, 153.2, 135.3, 130.9, 129.5, 129.2, 129.0, 127.5, 113.8, 75.6, 72.8, 72.4, 70.7, 66.2, 55.44, 55.36, 43.0, 40.3, 37.9, 35.0, 33.7, 28.7, 26.0, 18.1, 17.31, 11.3, -4.0, -4.5; IR (neat): 2941, 2861, 1785, 1702, 1383, 1249, 1097, 835 and 766 cm<sup>-1</sup>; HRMS (ESI-TOF): calculated for C<sub>35</sub>H<sub>54</sub>NO<sub>7</sub>Si [M+H]<sup>+</sup> 628.3664; found: 628.3659.

[See NMR spectra](#)

**(2R,3S,5S,8R)-5-((*tert*-Butyldimethylsilyl)oxy)-3-hydroxy-*N*-methoxy-9-((4-methoxybenzyl)oxy)-*N*,2,8-trimethylnonanamide (SI-7):**

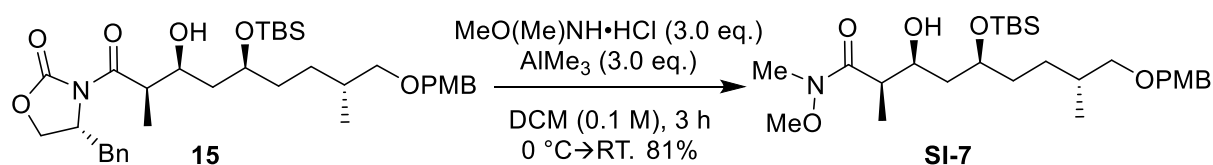

A flame-dried 250 mL round-bottom was charged with *N*,*O*-Dimethylhydroxylamine hydrochloride (2.3 g, 24.0 mmol, 3.0 eq.) and dissolved it in 30 mL of dry DCM. The mixture was cooled to 0 °C and under nitrogen atmosphere trimethylaluminium (2.0 M in toluene, 12.0 mL, 24.0 mmol, 3.0 eq.) was added dropwise. After stirring at the same temperature for 1 h, the reaction mixture was then cooled to -20 °C, and oxazolidinone **15** (5.0 g, 8.0 mmol, 1.0 eq.) in DCM (50 mL) was added dropwise. After 10 minutes, the reaction mixture was allowed to warm to room temperature and stirred for 3 h. Upon completion, the reaction mixture was cooled down to 0 °C and quenched with a 0.5 M aqueous sodium potassium tartrate solution, stirring at RT for 2 h. The reaction mixture was then diluted with DCM, layers were separated and the aqueous layer was further extracted with DCM (2 x 100 mL). Combined DCM layers were dried over Na<sub>2</sub>SO<sub>4</sub>, filtered, and concentrated under reduced pressure. The crude residue was purified by flash chromatography on silica gel, eluting with 15-25% ethyl acetate in

hexanes, to yield compound **SI-7** (3.25 g, 81% yield) as a yellow oil.  $R_f = 0.1$  (ethyl acetate/hexane 2:8);  $[\alpha]^{20}_D = +4.0^\circ$  ( $c = 0.5$  in  $\text{CHCl}_3$ );  $^1\text{H NMR}$  (400 MHz,  $\text{CDCl}_3$ )  $\delta$  7.24 (d,  $J = 8.7$  Hz, 2H), 6.86 (d,  $J = 8.7$  Hz, 2H), 4.49 – 4.32 (m, 2H), 4.00 – 3.93 (m, 1H), 3.92 – 3.84 (m, 2H), 3.79 (s, 3H), 3.67 (s, 3H), 3.27 (dd,  $J = 9.1, 6.1$  Hz, 1H), 3.20 (dd,  $J = 9.1, 6.6$  Hz, 1H), 3.17 (s, 3H), 2.92 (s, brs, 1H), 1.74 – 1.60 (m, 2H), 1.60 – 1.50 (m, 2H), 1.50 – 1.38 (m, 2H), 1.18 (d,  $J = 7.0$  Hz, 3H), 1.16 – 1.06 (m, 1H), 0.90 (d,  $J = 6.7$  Hz, 3H), 0.88 (s, 9H), 0.08 (s, 3H), 0.06 (s, 3H);  $^{13}\text{C NMR}$  (101 MHz,  $\text{CDCl}_3$ )  $\delta$  177.8, 159.1, 130.9, 129.2, 113.8, 75.7, 72.7, 71.9, 70.3, 61.6, 55.3, 40.5, 39.9, 34.5, 33.7, 32.0, 28.9, 26.0, 18.1, 17.3, 11.6, -4.1, -4.4; **IR** (neat): 2942, 2861, 1643, 1465, 1252, 1088, 834 and 761  $\text{cm}^{-1}$ ; **HRMS** (ESI-TOF): calculated for  $\text{C}_{27}\text{H}_{50}\text{NO}_6\text{Si}$   $[\text{M}+\text{H}]^+$  512.3402; found: 512.3397. [See NMR spectra](#)

**(2R,3S,5S,8R)-5-((tert-Butyldimethylsilyl)oxy)-N-methoxy-9-((4-methoxybenzyl)oxy)-N,2,8-trimethyl-3-((triethylsilyl)oxy)nonanamide (16):**

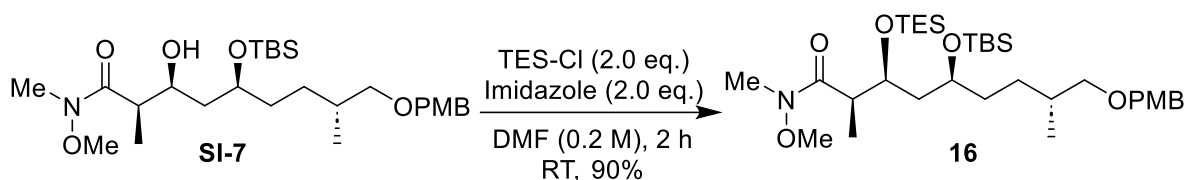

In a 100 mL round-bottom flask, a solution of 2° alcohol **SI-7** (5.0 g, 9.8 mmol, 1.0 eq.) in DMF (50 mL) was treated with imidazole (1.33 g, 19.6 mmol, 2.0 eq.) followed by the TES-Cl (3.5 mL, 19.6 mmol, 2.0 eq.) at room temperature. The mixture was allowed to stir for 2 hours. Upon completion of the starting material, the reaction mixture was quenched with water (50 mL), and the aqueous phase was extracted with EtOAc (2 x 200 mL), dried over  $\text{Na}_2\text{SO}_4$ , filtered, and concentrated under reduced pressure. The crude residue was purified by flash chromatography on silica gel, eluting with 5-15% ethyl acetate in hexanes, to afford compound **16** (5.5 g, 90% yield) as a colorless oil;  $R_f = 0.5$  (ethyl acetate/hexane 2:8);  $[\alpha]^{20}_D = -11.0^\circ$  ( $c = 0.5$  in  $\text{CHCl}_3$ );  $^1\text{H NMR}$  (400 MHz,  $\text{CDCl}_3$ )  $\delta$  7.19 (d,  $J = 8.3$  Hz, 2H), 6.81 (d,  $J = 8.7$  Hz, 2H), 4.47 – 4.26 (m, 2H), 4.02 – 3.85 (m, 1H), 3.74 (s, 3H), 3.71 – 3.63 (m, 1H), 3.60 (s, 3H), 3.25 (dd,  $J = 9.0, 5.9$  Hz, 1H), 3.14 (dd,  $J = 9.0, 7.0$  Hz, 1H), 3.10 (s, 3H), 2.94 – 2.81 (m, 1H), 1.73 – 1.42 (m, 5H), 1.34 – 1.18 (m, 1H), 1.08 (d,  $J = 6.9$  Hz, 3H), 1.05 – 0.95 (m, 1H), 0.94 – 0.89 (m, 9H), 0.87 (d,  $J = 6.7$  Hz, 3H), 0.81 (s, 9H), 0.62 – 0.51 (m, 6H), -0.01 (s, 3H), -0.02 (s, 3H);  $^{13}\text{C NMR}$  (101 MHz,  $\text{CDCl}_3$ )  $\delta$  176.1, 159.1, 131.1, 129.2, 113.8, 75.9, 72.7, 71.3, 70.0, 61.4, 55.4, 44.3, 42.3, 34.2, 33.8, 32.3, 29.4, 26.1, 18.2, 17.4, 13.8, 7.2, 5.4, -4.1, -4.4; **IR** (neat): 2948, 2870, 1668, 1465, 1252, 1098, 837 and 764  $\text{cm}^{-1}$ ; **HRMS** (ESI-TOF): calculated for  $\text{C}_{33}\text{H}_{64}\text{NO}_6\text{Si}_2$   $[\text{M}+\text{H}]^+$  626.4267; found: 626.4263. [See NMR spectra](#)

**(2*R*,3*S*,5*S*,8*R*)-5-((*tert*-Butyldimethylsilyl)oxy)-9-((4-methoxybenzyl)oxy)-1-(3-methoxyphenyl)-2,8-dimethyl-3-((triethylsilyl)oxy)nonan-1-one (17).**

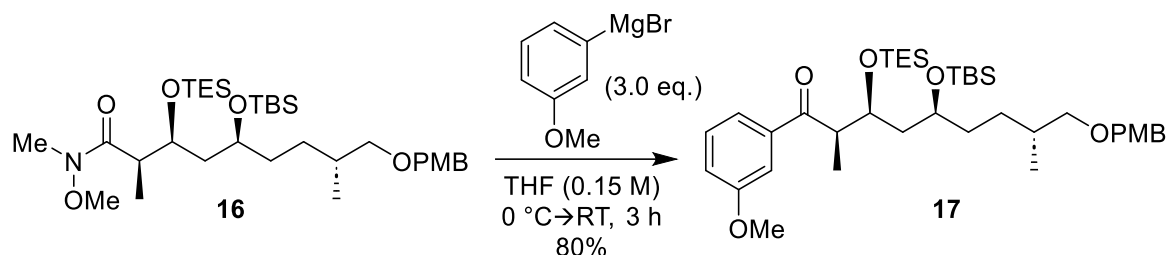

Weinreb amide **16** (5.0 g, 8.0 mmol, 1.0 equiv.) was dissolved in 50 mL of dry THF. Following this, 3-methoxyphenyl magnesium bromide (1M in THF, 24 mL, 24.0 mmol, 3.0 equiv.) was added dropwise to the solution at 0 °C. After 20 minutes, the reaction mixture was allowed to warm to room temperature and stirring was continued for 3 hours. Upon completion, the reaction mixture was quenched with an aqueous NH<sub>4</sub>Cl solution, and the compound was extracted with EtOAc (2 x 200 mL). The organic extracts were then dried over Na<sub>2</sub>SO<sub>4</sub>, filtered, and concentrated under reduced pressure. The crude residue was purified by flash chromatography on silica gel, eluting with 0-5% ethyl acetate in hexanes, to yield compound **17** (4.3g, 80% yield) as a colorless oil.  $R_f = 0.5$  (ethyl acetate/hexane 1:9);  $[\alpha]_D^{20} = -11.3^\circ$  ( $c = 1.0$  in CHCl<sub>3</sub>); <sup>1</sup>H NMR (500 MHz, CDCl<sub>3</sub>)  $\delta$  7.55 – 7.48 (m, 1H), 7.48 – 7.42 (m, 1H), 7.32 (t,  $J = 7.9$  Hz, 1H), 7.23 (d,  $J = 8.6$  Hz, 2H), 7.09 – 7.03 (m, 1H), 6.85 (d,  $J = 8.7$  Hz, 2H), 4.45 – 4.35 (m, 2H), 4.16 (q,  $J = 5.9$  Hz, 1H), 3.82 (s, 3H), 3.78 (s, 3H), 3.76 – 3.69 (m, 1H), 3.65 – 3.54 (m, 1H), 3.25 (dd,  $J = 9.0, 6.0$  Hz, 1H), 3.17 (dd,  $J = 9.0, 6.8$  Hz, 1H), 1.73 – 1.50 (m, 4H), 1.50 – 1.41 (m, 1H), 1.38 – 1.29 (m, 1H), 1.18 (d,  $J = 6.9$  Hz, 3H), 1.07 – 0.95 (m, 1H), 0.92 – 0.86 (m, 12H), 0.84 (s, 9H), 0.57 – 0.48 (m, 6H), -0.00 (s, 3H), -0.01 (s, 3H); <sup>13</sup>C NMR (101 MHz, CDCl<sub>3</sub>)  $\delta$  203.0, 160.0, 159.2, 138.7, 131.0, 129.6, 129.2, 121.1, 119.4, 113.8, 112.8, 75.8, 72.8, 70.9, 70.1, 55.5, 55.4, 47.2, 43.6, 34.4, 33.8, 29.3, 26.0, 18.2, 17.3, 12.7, 7.1, 5.4, -4.1, -4.3; IR (neat): 2948, 2870, 1602, 1465, 1254, 1090, 1044, 834 and 759 cm<sup>-1</sup>; HRMS (ESI-TOF): calculated for C<sub>38</sub>H<sub>65</sub>O<sub>6</sub>Si<sub>2</sub> [M+H]<sup>+</sup> 673.4319; found: 673.4315. [See NMR spectra](#)

**(1*R*,2*S*,3*S*,5*S*,8*R*)-5-((*tert*-Butyldimethylsilyl)oxy)-9-((4-methoxybenzyl)oxy)-1-(3-methoxyphenyl)-2,8-dimethyl-3-((triethylsilyl)oxy)nonan-1-ol (SI-8):**

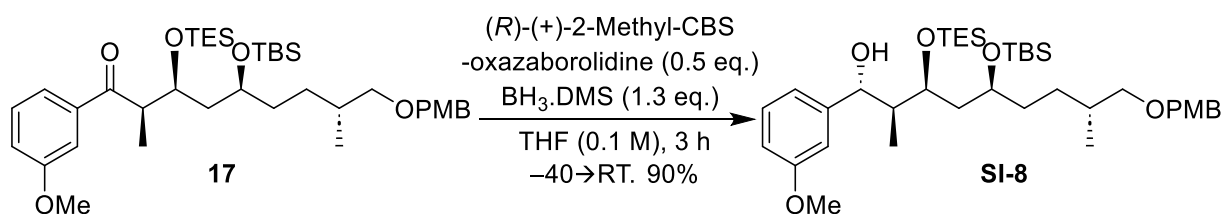

A flame-dried round-bottom flask was charged with (*R*)-Me-CBS catalyst (3.0 mL, 3.0 mmol, 0.5 eq.) dissolved in dry THF (30 mL). The resulting mixture was cooled to -40 °C, and

BH<sub>3</sub>.DMS (7.7 mL, 7.7 mmol, 1.3 eq.) was added dropwise. After being stirred for 30 minutes at -40 °C, ketone **17** (4.0 g, 5.9 mmol, 1.0 eq.) in THF (30 mL) was added dropwise and stirring was continued for 1 hour. Subsequently, the reaction mixture was warmed to room temperature, and stirred for 2 hours. Upon completion, the reaction mixture was cooled to 0 °C and quenched by adding MeOH (20 mL) dropwise. The resulting mixture was then concentrated under reduced pressure, and the crude residue was purified by flash chromatography on silica gel eluting with 0-10% ethyl acetate in hexanes, yielding compound **SI-8** (3.6 g, 90% yield, single diastereomer) as a colorless oil.  $R_f = 0.4$  (ethyl acetate/hexane 1:9);  $[\alpha]^{20}_D = -2.4^\circ$  ( $c = 0.5$  in CHCl<sub>3</sub>); <sup>1</sup>H NMR (500 MHz, CDCl<sub>3</sub>)  $\delta$  7.28 – 7.20 (m, 3H), 6.93 – 6.89 (m, 2H), 6.89 – 6.84 (m, 2H), 6.80 (ddd,  $J = 8.2, 2.5, 0.9$  Hz, 1H), 4.57 (dd,  $J = 9.2, 1.6$  Hz, 1H), 4.49 (s, 1H), 4.46 – 4.37 (m, 2H), 4.06 – 3.99 (m, 1H), 3.81 (s, 3H), 3.79 (s, 3H), 3.29 (dd,  $J = 9.0, 6.1$  Hz, 1H), 3.23 (dd,  $J = 9.0, 6.7$  Hz, 1H), 2.04 – 1.93 (m, 1H), 1.92 – 1.80 (m, 1H), 1.81 – 1.68 (m, 2H), 1.62 – 1.54 (m, 2H), 1.40 – 1.30 (m, 1H), 1.19 – 1.06 (m, 1H), 1.06 – 0.99 (m, 9H), 0.95 – 0.91 (m, 4H), 0.92 – 0.86 (m, 9H), 0.74 – 0.66 (m, 6H), 0.62 (d,  $J = 7.1$  Hz, 3H), 0.07 (s, 3H), 0.06 (s, 3H); <sup>13</sup>C NMR (126 MHz, CDCl<sub>3</sub>)  $\delta$  159.7, 159.2, 145.8, 131.0, 129.23, 129.19, 119.6, 113.8, 113.1, 112.5, 77.7, 75.8, 73.9, 72.8, 69.8, 55.4, 55.3, 44.7, 39.7, 34.1, 33.9, 29.3, 26.1, 18.2, 17.4, 13.5, 7.1, 5.3, -4.2, -4.3; IR (neat): 2949, 2870, 1465, 1254, 1217, 1090, 1044, 834 and 759 cm<sup>-1</sup>; HRMS (ESI-TOF): calculated for C<sub>38</sub>H<sub>67</sub>O<sub>6</sub>Si<sub>2</sub> [M+H]<sup>+</sup> 675.4471; found: 675.4465. [See NMR spectra](#)

**tert-Butyl(((2*S*,5*R*)-6-((4-methoxybenzyl)oxy)-1-((4*S*,5*R*,6*R*)-6-(3-methoxyphenyl)-2,2,5-trimethyl-1,3-dioxan-4-yl)-5-methylhexan-2-yl)oxy)dimethylsilane (**20**):**

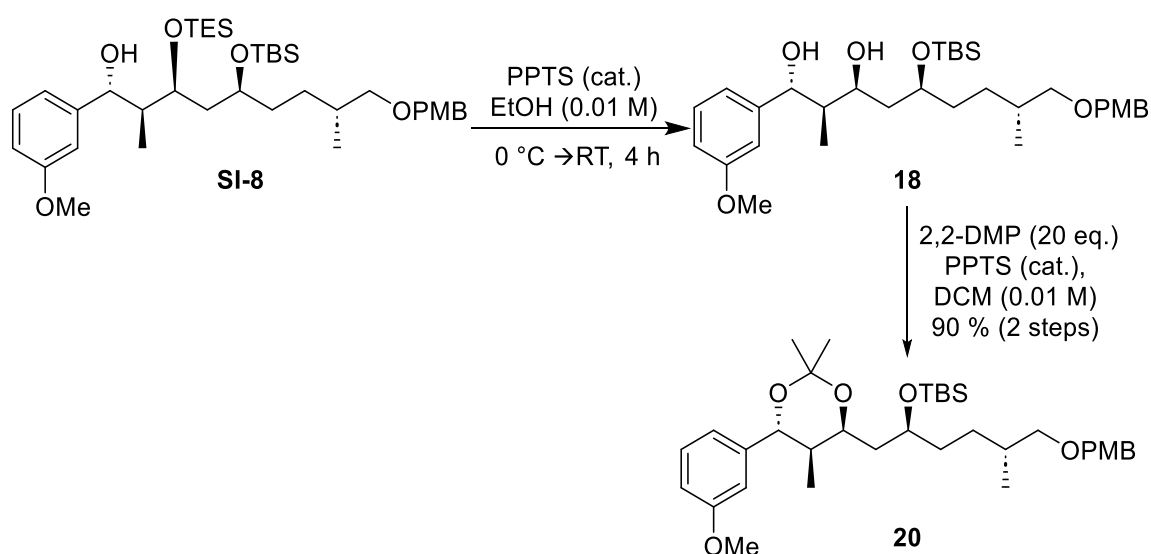

To a solution of alcohol **SI-8** (15.0 mg, 0.02 mmol, 1 eq.) in EtOH (2.0 mL) at 0 °C was added PPTS (1.0 mg, 0.004 mmol, 0.20 equiv.). The reaction mixture was slowly warmed to RT and

stirred for 4 h, then concentrated to dryness to afford crude **18** which was directly used in next step without further purification.

The above crude diol **18** was dissolved in 2.0 mL of DCM, and then 2,2-DMP (54.0  $\mu$ l, 0.44 mmol, 20.0 eq.) was added. Subsequently, a catalytic amount of PPTS was introduced, and the mixture was stirred at room temperature for 1 hour. After completion, the reaction mixture was quenched with aq. NaHCO<sub>3</sub> and compound was extracted with DCM (2 x 5 mL), dried over Na<sub>2</sub>SO<sub>4</sub>, filtered, and concentrated under reduced pressure. The crude residue was purified by flash chromatography on silica gel eluting with 0-5% ethyl acetate in hexanes to afford compound **20** (12.0 mg, 90% yield) as a colorless oil.  $R_f = 0.3$  (ethyl acetate/hexane 1:9);  $[\alpha]_D^{20} = +23.4^\circ$  ( $c = 1.0$  in CHCl<sub>3</sub>); **<sup>1</sup>H NMR** (400 MHz, CDCl<sub>3</sub>)  $\delta$  7.30 – 7.22 (m, 3H), 7.0 – 6.92 (m, 2H), 6.91 – 6.85 (m, 2H), 6.84 – 6.80 (m, 1H), 4.48 – 4.38 (m, 2H), 4.30 – 4.22 (m, 1H), 4.19 (d,  $J = 8.3$  Hz, 1H), 3.82 (s, 3H), 3.80 (s, 3H), 3.76 – 3.70 (m, 1H), 3.30 (dd,  $J = 9.0, 6.0$  Hz, 1H), 3.22 (dd,  $J = 9.0, 6.7$  Hz, 1H), 2.01 – 1.91 (m, 1H), 1.78 – 1.62 (m, 2H), 1.61 – 1.45 (m, 4H), 1.41 (s, 6H), 1.18 – 1.06 (m, 1H), 0.93 (d,  $J = 6.8$  Hz, 3H), 0.91 (s, 9H), 0.87 (d,  $J = 6.8$  Hz, 3H), 0.06 (d,  $J = 3.5$  Hz, 6H); **<sup>13</sup>C NMR** (101 MHz, CDCl<sub>3</sub>)  $\delta$  159.9, 159.2, 143.7, 131.0, 129.6, 129.2, 119.6, 113.9, 113.3, 112.7, 101.2, 77.8, 75.8, 72.8, 69.9, 65.9, 55.4, 55.36, 41.9, 38.1, 34.6, 33.8, 29.4, 26.1, 25.0, 24.1, 18.2, 17.4, 11.8, -4.2, -4.3; **IR** (neat): 2944, 2860, 1606, 1464, 1222, 1087, 1044, 834 and 760 cm<sup>-1</sup>; **HRMS** (ESI-TOF): calculated for C<sub>35</sub>H<sub>56</sub>O<sub>6</sub>SiNa [M+Na]<sup>+</sup> 623.3738; found: 623.3735. [See NMR spectra](#)

**(5*R*,6*R*,7*S*,9*S*)-7-((*tert*-Butyldimethylsilyl)oxy)-9-((*R*)-4-((4-methoxybenzyl)oxy)-3-methylbutyl)-5-(3-methoxyphenyl)-2,2,3,3,6,11,11,12,12-nonamethyl-4,10-dioxo-3,11-disilatridecane (SI-9):**

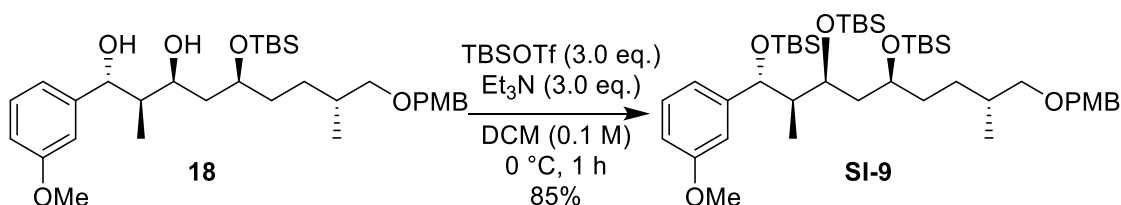

To a solution of crude alcohol **18** (3.5 g, 6.25 mmol, 1.0 eq.) and triethylamine (2.2 mL, 15.6 mmol, 3.0 eq.) in dichloromethane (30 mL) at 0 °C was added TBSOTf (3.6 mL, 15.6 mmol, 3.0 eq.) dropwise. The reaction mixture was stirred at 0 °C for 1 h, then quenched with saturated aq. NaHCO<sub>3</sub>. The layers were separated. The aqueous layer was extracted with CH<sub>2</sub>Cl<sub>2</sub> (3 x 60 mL). The organic extracts were combined, dried over Na<sub>2</sub>SO<sub>4</sub>, filtered and concentrated under reduced pressure. The crude residue was purified by flash chromatography on silica gel eluting with 0-10% ethyl acetate in hexanes to afford compound **SI-9** (4.0 g, 85% yield) as a colorless

oil;  $R_f = 0.6$  (ethyl acetate/hexane 1:9);  $[\alpha]^{20}_D = +11.6^\circ$  ( $c = 0.5$  in  $\text{CHCl}_3$ );  $^1\text{H NMR}$  (400 MHz,  $\text{CDCl}_3$ )  $\delta$  7.28 – 7.24 (m, 2H), 7.21 – 7.14 (m, 1H), 6.86 (d,  $J = 8.7$  Hz, 2H), 6.82 – 6.75 (m, 3H), 4.47 – 4.41 (m, 3H), 4.39 – 4.33 (m, 1H), 3.80 (s, 3H), 3.79 (s, 3H), 3.76 – 3.69 (m, 1H), 3.31 (dd,  $J = 9.0, 5.8$  Hz, 1H), 3.21 (dd,  $J = 9.0, 7.0$  Hz, 1H), 1.99 – 1.90 (m, 1H), 1.78 – 1.69 (m, 2H), 1.67 – 1.58 (m, 2H), 1.55 – 1.50 (m, 1H), 1.44 – 1.32 (m, 1H), 1.12 – 1.1 (m, 1H), 0.94 (d,  $J = 6.8$  Hz, 3H), 0.92 (s, 9H), 0.88 (s, 9H), 0.83 (s, 9H), 0.47 (d,  $J = 7.0$  Hz, 3H), 0.13 (s, 3H), 0.08 (s, 3H), 0.07 (s, 3H), 0.05 (s, 3H), 0.01 (s, 3H), -0.39 (s, 3H);  $^{13}\text{C NMR}$  (101 MHz,  $\text{CDCl}_3$ )  $\delta$  159.5, 159.2, 146.1, 131.1, 129.2, 129.0, 120.5, 113.8, 113.2, 112.8, 77.4, 75.9, 72.8, 70.3, 69.0, 55.4, 55.3, 46.5, 43.6, 34.2, 33.8, 29.7, 26.3, 26.2, 26.1, 18.5, 18.3, 18.2, 17.4, 10.0, -3.1, -3.4, -3.9, -4.0, -4.28, -4.33; **IR** (neat): 2949, 2863, 1608, 1468, 1256, 1083, 1044, 839 and 769  $\text{cm}^{-1}$ ; **HRMS** (ESI-TOF): calculated for  $\text{C}_{44}\text{H}_{84}\text{NO}_6\text{Si}_3$   $[\text{M}+\text{NH}_4]^+$  806.5606; found: 806.5602. [See NMR spectra](#)

**(2*R*,5*S*,7*S*,8*R*,9*R*)-5,7,9-tris((*tert*-Butyldimethylsilyl)oxy)-9-(3-methoxyphenyl)-2,8-dimethylnonan-1-ol (SI-10):**

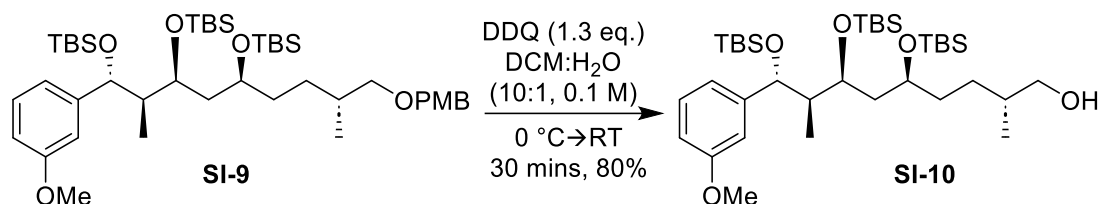

A 250-mL round-bottomed flask was charged with **SI-9** (3.9 mmol, 1.0 eq.), DCM (30 mL), and water (3.0 mL). The flask was cooled to 0 °C and DDQ (1.12 g, 4.9 mmol, 1.3 eq.) was added as a single portion. The resulting mixture was rapidly stirred for 30 minutes at RT, and then the reaction was quenched by addition of sat. aq.  $\text{NaHCO}_3$  (75 mL). The mixture was diluted with DCM and  $\text{H}_2\text{O}$ . The layers were separated, and the aqueous phase was extracted with DCM (2 x 100 mL). The combined organic extracts were dried over  $\text{Na}_2\text{SO}_4$  and then concentrated under reduced pressure. The crude residue was purified by flash chromatography on silica gel, using a gradient of 0-10% ethyl acetate in hexanes as the eluent. This process yielded compound **SI-10** (2.1 g, 80% yield) as a yellow oil.  $R_f = 0.3$  (ethyl acetate/hexane 1:9);  $[\alpha]^{20}_D = +15.3^\circ$  ( $c = 1.0$  in  $\text{CHCl}_3$ );  $^1\text{H NMR}$  (400 MHz,  $\text{CDCl}_3$ )  $\delta$  7.18 (t,  $J = 8.0$  Hz, 1H), 6.85 – 6.74 (m, 3H), 4.43 (d,  $J = 9.0$  Hz, 1H), 4.36 – 4.31 (m, 1H), 3.80 (s, 3H), 3.78 – 3.70 (m, 1H), 3.53 (dd,  $J = 10.5, 5.5$  Hz, 1H), 3.42 (dd,  $J = 10.5, 6.7$  Hz, 1H), 2.03 – 1.88 (m, 1H), 1.79 – 1.68 (m, 1H), 1.67 – 1.59 (m, 3H), 1.54 – 1.47 (m, 1H), 1.44 – 1.35 (m, 1H), 1.33 (br, s, 1H), 1.14 – 1.02 (m, 1H), 0.94 (d,  $J = 6.6$  Hz, 3H), 0.92 (s, 9H), 0.88 (s, 9H), 0.83 (s, 9H), 0.46 (d,  $J = 7.8$  Hz, 3H), 0.13 (s, 3H), 0.08 (s, 3H), 0.07 (s, 3H), 0.05 (s, 3H), 0.01 (s, 3H), -0.40 (s, 3H);  $^{13}\text{C NMR}$  (101 MHz,  $\text{CDCl}_3$ )  $\delta$  159.5, 146.0, 129.0, 120.5, 113.2, 112.8, 77.4, 70.3, 69.0,

68.5, 55.3, 46.6, 43.7, 36.14, 34.07, 29.0, 26.3, 26.15, 26.10, 18.5, 18.3, 18.2, 16.9, 10.1, -3.1, -3.4, -3.9, -4.0, -4.30, -4.35; **IR** (neat): 3021, 2951, 1468, 1215, 1046, 747 and 699  $\text{cm}^{-1}$ ; **HRMS** (ESI-TOF): calculated for  $\text{C}_{36}\text{H}_{72}\text{O}_5\text{Si}_3\text{Na}$   $[\text{M}+\text{Na}]^+$  691.4596; found: 691.4589. [See NMR spectra](#)

**(2*R*,5*S*,7*S*,8*R*,9*R*)-5,7,9-tris((*tert*-Butyldimethylsilyl)oxy)-9-(3-methoxyphenyl)-2,8-dimethylnonanal (+)-19:**

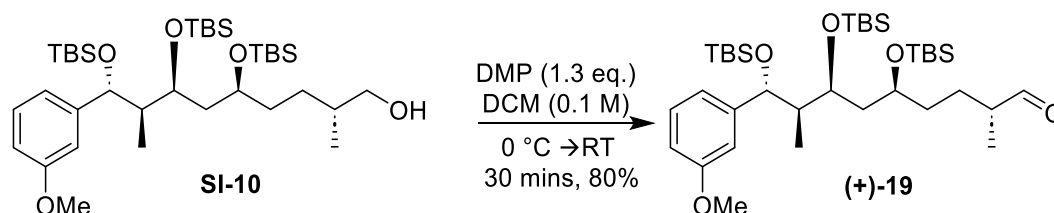

To a solution of 1° alcohol **SI-10** (1.0 g, 1.5 mmol, 1.0 eq.) in DCM (10 mL) at 0 °C, Dess-Martin periodinane (0.950 g, 2.25 mmol, 1.5 eq.) was added and stirred at room temperature for 30 minutes. After completion, the reaction mixture was quenched with a saturated sodium thiosulfate solution and stirred for an additional hour. The organic phase was extracted with DCM (2 x 50 mL), dried over  $\text{Na}_2\text{SO}_4$ , and the solvents were evaporated at below 30 °C. Compound (+)-**19** was obtained as a colorless oil (0.85 g, 85% crude yield) and used directly in the next step without further purification (see **S-31**);  $R_f$  = 0.5 (ethyl acetate/hexane 1:9); **<sup>1</sup>H NMR** (400 MHz,  $\text{CDCl}_3$ , Crude NMR)  $\delta$  9.63 (d,  $J$  = 1.8 Hz, 1H), 7.23 – 7.13 (m, 1H), 6.88 – 6.64 (m, 3H), 4.43 (d,  $J$  = 9.0 Hz, 1H), 4.36 – 4.22 (m, 1H), 4.17 – 4.12 (m, 1H), 3.80 (s, 3H), 2.33 – 2.25 (m, 2H), 2.1 – 1.97 (m, 1H), 1.95 – 1.90 (m, 1H), 1.89 – 1.81 (m, 1H), 1.79 – 1.70 (m, 1H), 1.64 – 1.56 (m, 2H), 1.10 (d,  $J$  = 7.0 Hz, 3H), 0.92 (s, 9H), 0.88 (s, 9H), 0.83 (s, 9H), 0.48 (d,  $J$  = 7.0 Hz, 3H), 0.13 (s, 3H), 0.08 (s, 3H), 0.07 (s, 3H), 0.05 (s, 3H), 0.00 (s, 3H), -0.41 (s, 3H). [See NMR spectra](#)



## 2.5. Synthesis of Julia-Kocienski olefination partner fragment-28:

### Ethyl (*E*)-4-((*tert*-butyldimethylsilyl)oxy)-2-methylbut-2-enoate (**22**):

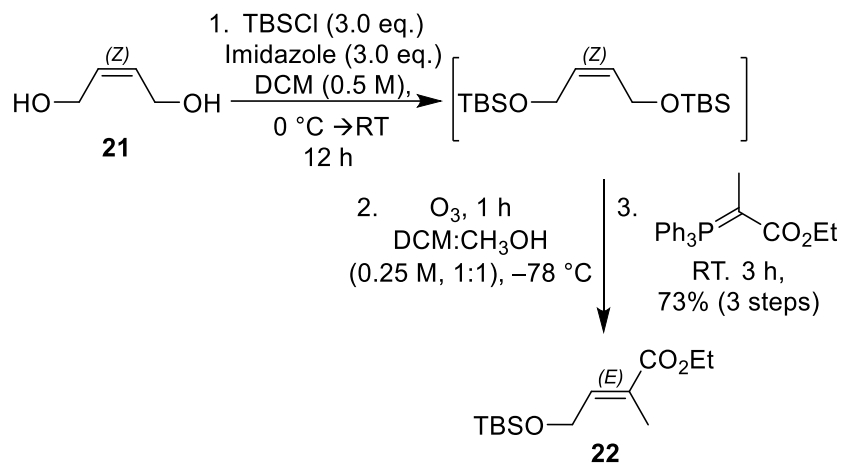

In a round-bottom flask charged with *cis*-1,4-butene diol **21** (10.0 g, 113.0 mmol, 1.0 eq.) and dissolved in DCM (200 mL) at 0 °C, followed by imidazole (23.0 g, 341.0 mmol, 3.0 eq.) was added. The resulting mixture was stirred for 10 minutes, and then TBS-Cl (51.0 g, 341.0 mmol, 3.0 eq.) was introduced at 0 °C. The reaction mixture was warmed to room temperature and stirred for 12 hours. Upon completion, the reaction mixture was quenched with water, and the layers were separated. The aqueous phase was further extracted with DCM (2 x 300 mL). Combined organic layers were dried over Na<sub>2</sub>SO<sub>4</sub>, and concentrated under reduced pressure.

The crude residue taken into DCM:MeOH (1:1, 300 mL) was cooled to -78 °C. Ozone was slowly bubbled through the solution until it turned blue solution. Then the reaction mixture was purged with N<sub>2</sub> and charged with triphenylphosphine (23.0 g, 87.0 mmol, 1.1 eq.) and stirring was continued at room temperature for 30 minutes. Subsequently, (1-Carboxyethylidene)triphenylphosphorane (31.5 g, 87.0 mmol, 1.1 eq.) was added to the above crude solution at room temperature and allowed to stir for 3 hours. Then, the solvent was evaporated and concentrated under reduced pressure. Most of the triphenylphosphine oxide was removed by hexane trituration and the obtained crude residue was purified by flash chromatography on silica gel eluting in hexanes to afford compound **22** (21.5 g, 73% yield) as a colorless oil. *R<sub>f</sub>* = 0.5 (ethyl acetate/hexane 1:9); <sup>1</sup>H NMR (400 MHz, CDCl<sub>3</sub>) δ 6.77 (td, *J* = 5.6, 1.2 Hz, 1H), 4.41 – 4.28 (m, 2H), 4.19 (q, *J* = 7.1 Hz, 2H), 1.81 (d, *J* = 1.0 Hz, 3H), 1.29 (t, *J* = 7.1 Hz, 3H), 0.91 (s, 9H), 0.08 (s, 6H); <sup>13</sup>C NMR (101 MHz, CDCl<sub>3</sub>) δ 167.9, 141.4, 127.5, 60.8, 60.7, 26.0, 18.5, 14.4, 12.8, -5.1; IR (neat): 2953, 2866, 1720, 1468, 1378, 1255, 1134, 1065, 844 and 774 cm<sup>-1</sup>; HRMS (ESI-TOF) calculated for C<sub>13</sub>H<sub>27</sub>O<sub>3</sub>Si [M+H]<sup>+</sup> 259.1724; found: 259.1721. [See NMR spectra](#)

**(E)-4-((tert-Butyldimethylsilyl)oxy)-2-methylbut-2-enal (23):**

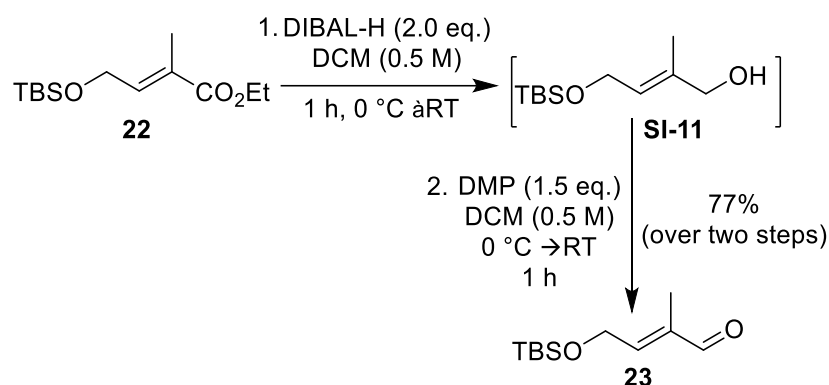

To a solution of compound **22** (15.0 g, 58.0 mmol, 1.0 eq.) in DCM (150 mL) at 0 °C was added a solution of DIBAL-H in toluene (116.0 mL, 1.0 M, 116.0 mmol, 2.0 eq.) dropwise for 15 minutes. The reaction mixture was slowly warmed to room temperature and stirred for 1 h. After completion, the reaction mixture was cooled to 0 °C and quenched with sat. aq. Rochelle's salt. The biphasic mixture was stirred vigorously at RT for 2 h, and then the layers were separated. The aqueous phase was further extracted with DCM (2 x 250 mL), and combined organic layers were dried over Na<sub>2</sub>SO<sub>4</sub>, filtered, and concentrated under reduced pressure. The crude residue was utilized in the next step without further purification; <sup>1</sup>H NMR (400 MHz, CDCl<sub>3</sub>, crude **SI-11**) δ 5.52 – 5.44 (m, 1H), 4.15 (dd, *J* = 6.3, 0.8 Hz, 2H), 3.91 (s, 2H), 1.57 (s, 3H), 0.82 (s, 9H), -0.01 (s, 6H); <sup>13</sup>C NMR (101 MHz, CDCl<sub>3</sub>, crude **SI-11**) δ 136.3, 125.2, 68.3, 60.0, 26.1, 18.5, 13.9, -5.0. [See NMR spectra](#)

The above crude alcohol **SI-11** (12.0 g, 55.6 mmol, 1.0 equiv.) was dissolved in dichloromethane (DCM, 100 mL) followed by Dess Martin periodinane (35.0 g, 83.4 mmol, 1.5 equiv.) was added at 0 °C. After stirring for 1 h at room temperature, the reaction mixture was quenched with a saturated sodium thiosulfate solution and stirred for an additional 1 hour. The organic compounds were then extracted with DCM (2 x 250 mL), dried over Na<sub>2</sub>SO<sub>4</sub>, filtered, and concentrated under reduced pressure. The crude residue was subjected to purification by flash chromatography on silica gel, eluting with ethyl acetate: hexanes (0-10%), yielding aldehyde compound **23** (9.6 g, 77% yield) as a yellow oil; *R*<sub>f</sub> = 0.5 (ethyl acetate/hexane 1:9); <sup>1</sup>H NMR (400 MHz, CDCl<sub>3</sub>) δ 9.40 (s, 1H), 6.50 (ddd, *J* = 6.7, 4.1, 1.3 Hz, 1H), 4.48 (ddd, *J* = 5.3, 2.2, 1.0 Hz, 2H), 1.71 (dd, *J* = 2.4, 1.1 Hz, 3H), 0.90 (s, 9H), 0.08 (s, 6H); <sup>13</sup>C NMR (101 MHz, CDCl<sub>3</sub>) δ 194.7, 153.2, 137.8, 60.6, 25.9, 18.4, 9.5, -5.2; IR (neat): 2950, 2863, 1696, 1468, 1259, 1117, 1068, 839 and 777 cm<sup>-1</sup>; HRMS (ESI-TOF) calculated for C<sub>11</sub>H<sub>22</sub>O<sub>2</sub>SiNa [M+Na]<sup>+</sup> 237.1281; found: 237.1284. [See NMR spectra](#)

**(*R,E*)-7-((*tert*-Butyldimethylsilyloxy)-5-methylhepta-1,5-dien-4-ol (**24**):**

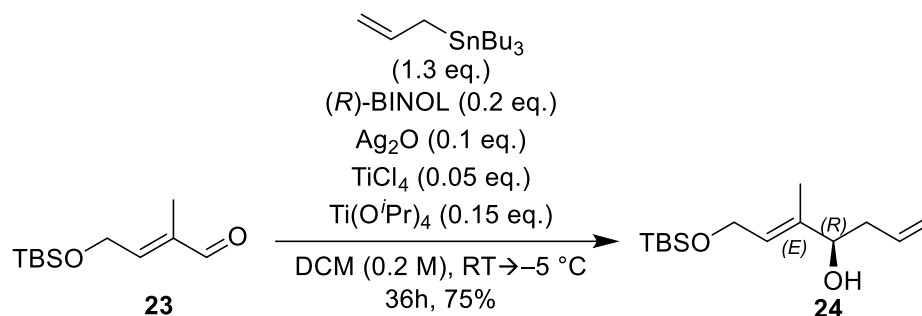

Under a nitrogen atmosphere, a 500 mL reaction flask was charged with 1.85 mL of TiCl<sub>4</sub> (1.85 mmol, 0.05 eq.) dissolved in 80 mL of DCM. The solution was cooled to 0 °C, and then 1.7 mL of Ti(O<sup>*i*</sup>Pr)<sub>4</sub> (5.6 mmol, 0.15 eq.) was added. The mixture was then warmed to room temperature and stirred for 1 hour. Ag<sub>2</sub>O (0.86 g, 3.7 mmol, 0.1 eq.) was added at room temperature and the mixture was stirred for 5 h in the dark. At this point, a solution of (*R*)-BINOL (1.72 g, 7.4 mmol, 0.2 eq.) in 100 mL of DCM was added to the reaction mixture, and stirring was continued for an additional 2 hours. The mixture was cooled to -15 °C, and a DCM (50 mL) solution of aldehyde **23** (8.0 g, 37.0 mmol, 1.0 eq.) and allyl tributyltin (15.0 mL, 48.1 mmol, 1.3 eq.) were sequentially added. The mixture was allowed to warm to -5 °C and stirred for 24 hours. Following TLC confirmation, the reaction mixture was quenched with saturated aq. NaHCO<sub>3</sub>, and extracted with DCM (2 x 200 mL). The organic extracts were dried over Na<sub>2</sub>SO<sub>4</sub> and evaporated. The residue was purified by column chromatography on silica gel (using EtOAc/Hexane 1:9) resulted in the isolation of compound **24** as a colorless oil (7.1 g, 75% yield, the enantiomeric ratio was determined to be 94:6, after TBDPS protection, [see S-28](#)); *R<sub>f</sub>* = 0.3 (ethyl acetate/hexane 1:9); [α]<sup>20</sup><sub>D</sub> = +9.4° (*c* = 1.0 in CHCl<sub>3</sub>); <sup>1</sup>H NMR (400 MHz, CDCl<sub>3</sub>) δ 5.87 – 5.66 (m, 1H), 5.66 – 5.51 (m, 1H), 5.23 – 5.06 (m, 2H), 4.23 (d, *J* = 6.0 Hz, 2H), 4.09 – 3.97 (m, 1H), 2.44 – 2.21 (m, 2H), 1.62 (d, *J* = 0.9 Hz, 3H), 0.89 (s, 9H), 0.06 (s, 6H); <sup>13</sup>C NMR (101 MHz, CDCl<sub>3</sub>) δ 137.7, 134.8, 126.3, 117.9, 76.0, 60.1, 39.8, 26.1, 18.5, 12.2, -5.0; IR (neat): 2943, 2863, 1466, 1386, 1258, 1063, 840 and 765 cm<sup>-1</sup>; HRMS (SI-TOF): calculated for C<sub>14</sub>H<sub>28</sub>O<sub>2</sub>SiNa [M+Na]<sup>+</sup> 279.1751; found: 279.1748. [See NMR spectra](#)

### Mosher ester analysis on compound 24:

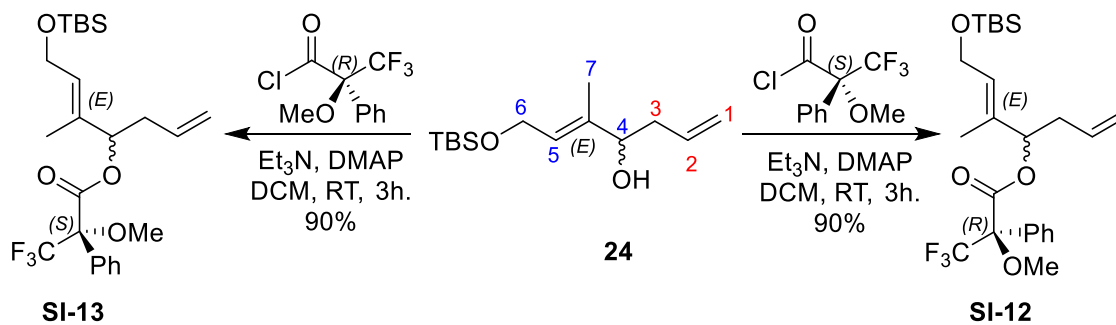

$\Delta\delta$  ( $= \delta_R - \delta_S$ ) data for the S- and R-MTPA- Mosher ester's **SI-12** and **SI-13** (**Figure-S9**)

|   | $\delta$ R ester (ppm) | $\delta$ S ester (ppm) | $\Delta\delta^{RS}$ ( $= \delta_R - \delta_S$ ) (ppm) |
|---|------------------------|------------------------|-------------------------------------------------------|
| 1 | 5.03, 5.00             | 5.12, 5.09             | -0.09, -0.9                                           |
| 2 | 5.60                   | 5.71                   | -0.11                                                 |
| 3 | 2.42                   | 2.47                   | -0.05                                                 |
| 4 | 5.46                   | 5.43                   | 0.03                                                  |
| 5 | 5.70                   | 5.63                   | 0.07                                                  |
| 6 | 4.23                   | 4.19                   | 0.05                                                  |
| 7 | 1.64                   | 1.49                   | 0.15                                                  |

Precisely, protons that have positive  $\Delta\delta_{RS}$  values reside within  $R_1$  and the protons with negative values belong to  $R_2$ . According to this allylic side chain resides within  $R_2$  (due to its negative  $\Delta\delta_{RS}$  values) and the -OTBS fragment belongs to  $R_1$  *i.e* on the opposite side of that plane (**Figure- S9**).

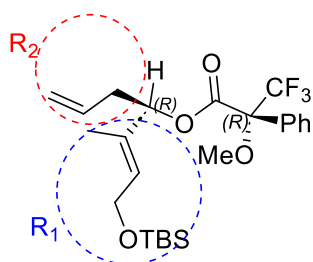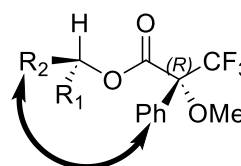

Phenyl group shielding effect results upfield chemical shift for the protons belong to  $R_2$

**(*R,E*)-7-((*tert*-Butyldimethylsilyl)oxy)-5-methylhepta-1,5-dien-4-yl (*R*)-3,3,3-trifluoro-2-methoxy-2-phenylpropanoate (SI-12):**

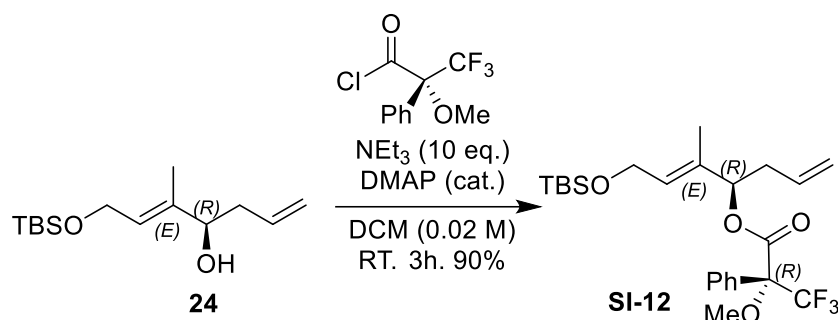

**SI-12** was synthesized by following the procedure described on page **S-11** and resulted in 90% yield;  $R_f = 0.6$  (ethyl acetate/hexane 1:9);  $[\alpha]^{20}_D = +39.3^\circ$  ( $c = 1.0$  in  $\text{CHCl}_3$ );  $^1\text{H NMR}$  (400 MHz,  $\text{CDCl}_3$ )  $\delta$  7.53 – 7.47 (m, 2H), 7.42 – 7.34 (m, 3H), 5.70 (dt,  $J = 5.6, 4.8$  Hz, 1H), 5.61 (ddt,  $J = 17.2, 10.2, 7.0$  Hz, 1H), 5.46 (dd,  $J = 7.7, 6.1$  Hz, 1H), 5.11 – 4.97 (m, 2H), 4.31 – 4.15 (m, 2H), 3.52 (d,  $J = 1.1$  Hz, 3H), 2.60 – 2.31 (m, 2H), 1.64 (d,  $J = 1.1$  Hz, 3H), 0.90 (s, 9H), 0.06 (s, 6H);  $^{13}\text{C NMR}$  (151 MHz,  $\text{CDCl}_3$ )  $\delta$  165.8, 132.8, 132.54, 132.52, 130.5, 129.6, 128.4, 127.6, 123.5 (q,  $J = 288.4$  Hz), 118.4, 84.7 (q,  $J = 27.7$  Hz), 80.7, 59.8, 55.5, 37.2, 26.0, 18.4, 12.4, -5.0, -5.0;  $^{19}\text{F NMR}$  (377 MHz,  $\text{CDCl}_3$ )  $\delta$  -71.38; **IR** (neat): 2945, 2861, 1751, 1465, 1259, 1180, 1114, 1081, 839, 772 and 721  $\text{cm}^{-1}$ . [See NMR spectra](#)

**(*R,E*)-7-((*tert*-Butyldimethylsilyl)oxy)-5-methylhepta-1,5-dien-4-yl (*S*)-3,3,3-trifluoro-2-methoxy-2-phenylpropanoate (SI-13):**

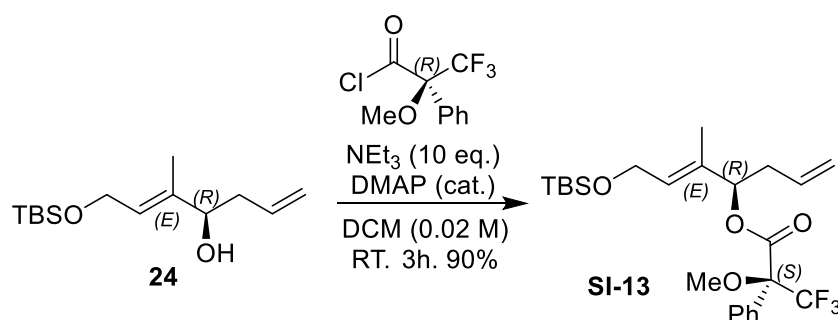

**SI-13** was synthesized by following the procedure described on page **S-11** and resulted in 90% yield;  $R_f = 0.6$  (ethyl acetate/hexane 1:9);  $[\alpha]^{20}_D = -31.0^\circ$  ( $c = 1.0$  in  $\text{CHCl}_3$ );  $^1\text{H NMR}$  (400 MHz,  $\text{CDCl}_3$ )  $\delta$  7.55 – 7.48 (m, 2H), 7.38 (dt,  $J = 3.2, 2.3$  Hz, 3H), 5.79 – 5.66 (m, 1H), 5.63 (t,  $J = 5.9$  Hz, 1H), 5.43 (dd,  $J = 8.0, 5.8$  Hz, 1H), 5.17 – 5.06 (m, 2H), 4.20 (dd,  $J = 8.3, 3.1$  Hz, 2H), 3.55 (d,  $J = 1.1$  Hz, 3H), 2.46 (dtt,  $J = 14.5, 4.5, 2.6$  Hz, 2H), 1.49 (d,  $J = 0.9$  Hz, 3H), 0.90 (s, 9H), 0.06 (d,  $J = 1.5$  Hz, 6H);  $^{13}\text{C NMR}$  (151 MHz,  $\text{CDCl}_3$ )  $\delta$  165.8, 133.1, 132.53, 132.48, 130.3, 129.6, 128.4, 127.5, 123.5 (q,  $J = 288.5$  Hz), 118.4, 84.6 (q,  $J = 27.6$  Hz), 80.8, 59.8, 55.7, 37.2, 26.0, 18.4, 12.1, -5.01, -5.04;  $^{19}\text{F NMR}$  (377 MHz,  $\text{CDCl}_3$ )  $\delta$  -71.47; **IR**

(neat): 2945, 2861, 1751, 1465, 1259, 1180, 1114, 1081, 839, 772 and 721  $\text{cm}^{-1}$ . [See NMR spectra](#)

**(R,E)-5-Allyl-2,2,6,10,10,11,11-heptamethyl-3,3-diphenyl-4,9-dioxa-3,10-disiladodec-6-ene (SI-14) :**

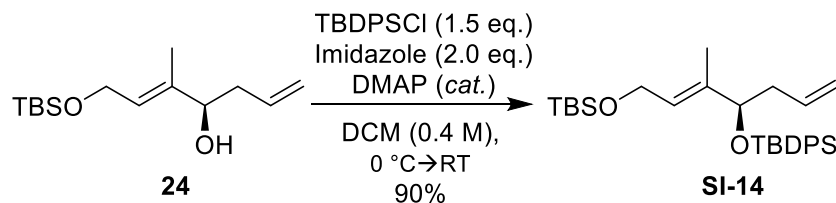

The flame-dried RB flask was charged with 2° Alcohol **24** (5.0 g, 19.5 mmol, 1.0 eq.) and dissolved in 50 mL of DCM. The mixture was cooled to 0 °C, and then Imidazole (2.7 g, 39.0 mmol, 2.0 eq.) and DMAP (0.237 g, 1.95 mmol, 0.1 eq.) were added simultaneously. After 10 mins, TBDPS-Cl (7.5 mL, 29.0 mmol, 1.5 eq.) was introduced and stirred the reaction mixture at room temperature for 2 h. Upon completion, the reaction mixture was quenched with water, and the compound was extracted with DCM (2 x 100 mL). The organic extracts were combined and dried over  $\text{Na}_2\text{SO}_4$ . Evaporation of solvents and purification of the residue by column chromatography on silica gel (EtOAc/Hexane 0-5%) yielded compound **SI-14** as a greenish oil (8.7 g, 90% yield);  $R_f = 0.8$  (ethyl acetate/hexane 5:95);  $[\alpha]^{20}_{\text{D}} = +9.2^\circ$  ( $c = 1.0$  in  $\text{CHCl}_3$ );  $^1\text{H NMR}$  (400 MHz,  $\text{CDCl}_3$ )  $\delta$  7.72 – 7.61 (m, 4H), 7.46 – 7.30 (m, 6H), 5.67 – 5.46 (m, 1H), 5.41 – 5.14 (m, 1H), 5.07 – 4.77 (m, 2H), 4.18 – 4.02 (m, 3H), 2.28 – 2.20 (m, 2H), 1.57 (s, 3H), 1.07 (s, 9H), 0.89 (s, 9H), 0.05 (s, 6H);  $^{13}\text{C NMR}$  (101 MHz,  $\text{CDCl}_3$ )  $\delta$  136.7, 136.14, 136.08, 134.9, 134.6, 134.1, 129.65, 129.62, 127.6, 127.5, 126.9, 116.6, 78.4, 60.0, 40.7, 27.2, 26.1, 19.5, 18.5, 11.8, -5.0; **IR** (neat): 2945, 2862, 1471, 1257, 1108, 1081, 840, 770 and 704  $\text{cm}^{-1}$ ; **HRMS** (ESI-TOF) calculated for  $\text{C}_{30}\text{H}_{50}\text{NO}_2\text{Si}_2$   $[\text{M}+\text{NH}_4]^+$  512.3375; found: 512.3373. [See NMR spectra](#)

## HPLC report of compound SI-14.

Acquired by : Manjula  
 Sample Name : SCS-MCR-49-RAC  
 Sample ID : SCS-MCR-49-RAC  
 Tray# : 1  
 Vial # : 87  
 Injection Volume : 2 uL  
 Data File Name : 28042022.9.lcd  
 Method File Name : 28042022.lcm  
 Batch File Name :  
 Report File Name : Default.lcr  
 Data Acquired : 4/28/2022 3:24:53 PM  
 Data Processed : 4/28/2022 3:55:03 PM  
 COLUMN: EUROCEL-02 250 X 4.6mm 5u  
 MOBILE PHASE: 0.5% IPA IN HEXANE  
 FLOW RATE : 0.3ml/min

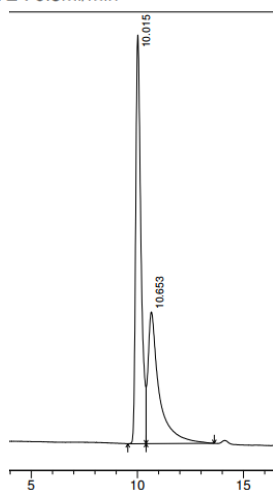

PDA Ch1 210nm 1nm

| Peak# | Ret. Time | Area     | Height | Area %  | Height % |
|-------|-----------|----------|--------|---------|----------|
| 1     | 10.015    | 8304765  | 475212 | 59.616  | 75.624   |
| 2     | 10.653    | 5625551  | 153173 | 40.384  | 24.376   |
| Total |           | 13930316 | 628385 | 100.000 | 100.000  |

**Figure S7: HPLC report of Racemic SI-14**

Acquired by : Manjula  
 Sample Name : SCS-MCR-2398-CHIRAL  
 Sample ID : SCS-MCR-2398-CHIRAL  
 Tray# : 1  
 Vial # : 85  
 Injection Volume : 2 uL  
 Data File Name : 28042022.12.lcd  
 Method File Name : 28042022.lcm  
 Batch File Name :  
 Report File Name : Default.lcr  
 Data Acquired : 4/28/2022 4:45:35 PM  
 Data Processed : 4/28/2022 5:21:36 PM  
 COLUMN: EUROCEL-02 250 X 4.6mm 5u  
 MOBILE PHASE: 0.5% IPA IN HEXANE  
 FLOW RATE : 0.3ml/min

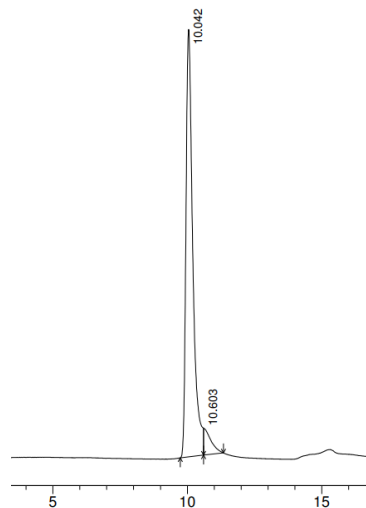

PDA Ch1 210nm 1nm

| Peak# | Ret. Time | Area     | Height | Area %  | Height % |
|-------|-----------|----------|--------|---------|----------|
| 1     | 10.042    | 11436700 | 647536 | 93.858  | 94.065   |
| 2     | 10.603    | 748383   | 40853  | 6.142   | 5.935    |
| Total |           | 12185083 | 688389 | 100.000 | 100.000  |

**Figure S8: HPLC report of Chiral SI-14**

**(*R,E*)-4-((*tert*-Butyldiphenylsilyloxy)-3-methylhepta-2,6-dien-1-ol (25):**

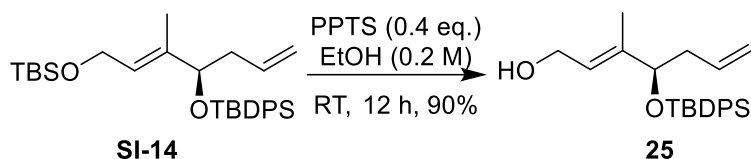

In a round-bottom flask, compound **SI-14** (8.0 g, 16.2 mmol, 1.0 eq.) was dissolved in ethanol (80 mL) at room temperature. PPTS (1.65 g, 6.5 mmol, 0.4 eq.) was added, and the mixture was stirred overnight. Upon completion of the reaction, ethanol was evaporated, and the residue was diluted with MTBE. Aqueous NaHCO<sub>3</sub> was then added. Organic phase was extracted with MTBE (2 x 150 mL), dried over Na<sub>2</sub>SO<sub>4</sub>, evaporation of solvents and purification of the residue by column chromatography on silica gel (EtOAc/Hexane 1:9) gave compound **25** as a colorless oil (5.5 g, 90% yield);  $R_f = 0.2$  (ethyl acetate/hexane 1:9);  $[\alpha]^{20}_D = -5.9^\circ$  ( $c = 1.0$  in CHCl<sub>3</sub>); **<sup>1</sup>H NMR** (500 MHz, CDCl<sub>3</sub>)  $\delta$  7.75 – 7.60 (m, 4H), 7.51 – 7.32 (m, 6H), 5.77 – 5.53 (m, 1H), 5.34 – 5.13 (m, 1H), 4.99 – 4.96 (m, 1H), 4.95 – 4.92 (m, 1H), 4.13 (t,  $J = 6.5$  Hz, 1H), 4.00 – 3.92 (m, 2H), 2.43 – 2.22 (m, 2H), 1.59 (s, 3H), 1.09 (s, 9H); **<sup>13</sup>C NMR** (101 MHz, CDCl<sub>3</sub>)  $\delta$  139.6, 136.15, 136.08, 134.7, 134.4, 134.2, 129.72, 129.66, 127.6, 127.5, 125.4, 116.8, 78.3, 58.9, 40.7, 27.2, 19.5, 11.6; **IR** (neat): 3358, 3067, 2935, 2861, 1470, 1430, 1107, 1003, 756 and 703 cm<sup>-1</sup>; **HRMS** (ESI-TOF): calculated for C<sub>24</sub>H<sub>36</sub>NO<sub>2</sub>Si [M+NH<sub>4</sub>]<sup>+</sup> 398.2515; found: 398.2512. [See NMR spectra](#)

**(*R,E*)-5-((4-((*tert*-Butyldiphenylsilyloxy)-3-methylhepta-2,6-dien-1-yl)thio)-1-phenyl-1H-tetrazole (27):**

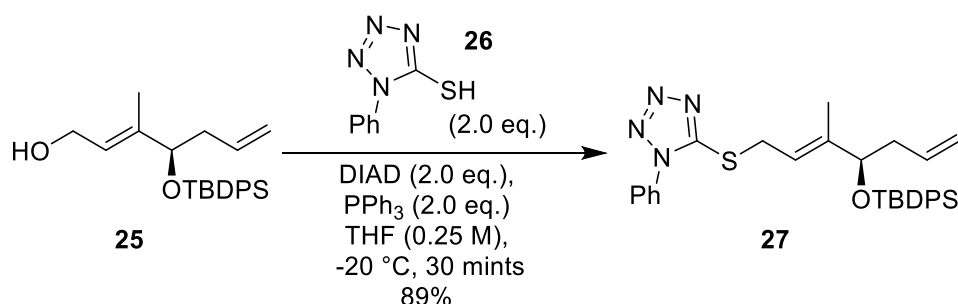

A flame-dried 100 mL round-bottom flask was charged with 6.0 grams (15.8 mmol, 1.0 eq.) of 1° alcohol **25** and dissolved in dry tetrahydrofuran (60 mL). To this solution, triphenylphosphine (8.3 g, 31.6 mmol, 2.0 eq.) and PTSH **26** (5.6 g, 31.6 mmol, 2.0 eq.) were added simultaneously. The mixture was cooled to -20 °C, subsequently, DIAD (6.21 mL, 31.6 mmol, 2.0 eq.) was added dropwise, and the reaction was allowed to stir for 30 mints at that temperature. After completion, the reaction mixture was quenched with aqueous sodium bicarbonate, and the organic phase was extracted with ethyl acetate (2 x 150 mL). The



combined organic extracts were dried over Na<sub>2</sub>SO<sub>4</sub>, followed by solvent evaporation. The obtained crude residue was subjected to purification by column chromatography on silica gel (ethyl acetate/hexane 1:9), resulting in the isolation of compound **27** as a colorless oil (7.6 g, 89% yield);  $R_f = 0.5$  (ethyl acetate/hexane 1:9);  $[\alpha]^{20}_D = +34.7^\circ$  ( $c = 1.0$  in CHCl<sub>3</sub>); **<sup>1</sup>H NMR** (400 MHz, CDCl<sub>3</sub>)  $\delta$  7.67 – 7.62 (m, 2H), 7.61 – 7.48 (m, 7H), 7.43 – 7.38 (m, 1H), 7.37 – 7.30 (m, 3H), 7.30 – 7.23 (m, 2H), 5.60 – 5.42 (m, 1H), 5.37 (t,  $J = 7.9$  Hz, 1H), 4.90 – 4.86 (m, 1H), 4.86 – 4.82 (m, 1H), 4.07 (t,  $J = 6.3$  Hz, 1H), 3.96 (qd,  $J = 12.6, 8.0$  Hz, 2H), 2.32 – 2.20 (m, 2H), 1.69 (s, 3H), 1.03 (s, 9H); **<sup>13</sup>C NMR** (101 MHz, CDCl<sub>3</sub>)  $\delta$  154.3, 143.6, 136.0, 135.99, 134.2, 134.1, 133.9, 130.2, 129.9, 129.8, 129.7, 127.6, 127.5, 123.9, 118.6, 117.0, 77.7, 40.5, 31.0, 27.1, 19.5, 12.1; **IR** (neat): 3067, 2931, 2860, 1561, 1500, 1422, 1104, 1073, 760 and 701 cm<sup>-1</sup>; **HRMS** (ESI-TOF): calculated for C<sub>31</sub>H<sub>36</sub>N<sub>4</sub>OSSiNa [M+Na]<sup>+</sup> 563.2277; found: 563.2274. [See NMR spectra](#)

**(*R,E*)-5-((4-((*tert*-Butyldiphenylsilyloxy)-3-methylhepta-2,6-dien-1-yl)sulfonyl)-1-phenyl-1H-tetrazole (**28**):**

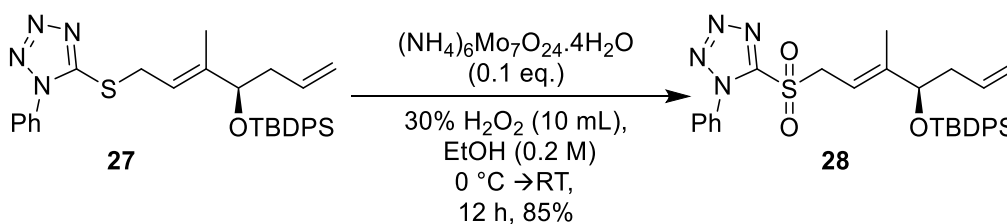

To a solution of tetrazole compound **27** (5.0 g, 9.26 mmol, 1.0 eq.) in ethanol (50 mL) at 0 °C, ammonium molybdate (1.14 g, 0.9 mmol, 0.1 eq.) and 30% H<sub>2</sub>O<sub>2</sub> (10 mL) were added dropwise. The mixture was slowly warmed to room temperature and allowed to stir for 12 hours. After completion, the reaction was quenched by the dropwise addition of a saturated sodium thiosulfate solution at 0 °C. Ethanol was removed, and the organic phase was extracted with EtOAc, followed by drying over Na<sub>2</sub>SO<sub>4</sub>, evaporation of solvents and purification of the residue by column chromatography on silica gel (EtOAc/Hexane 1:9) gave compound **28** as a colorless gel (4.5 g, 85% yield);  $R_f = 0.5$  (ethyl acetate/hexane 1:9);  $[\alpha]^{20}_D = +24.9^\circ$  ( $c = 1.0$  in CHCl<sub>3</sub>); **<sup>1</sup>H NMR** (400 MHz, CDCl<sub>3</sub>)  $\delta$  7.67 – 7.61 (m, 4H), 7.61 – 7.51 (m, 5H), 7.45 – 7.33 (m, 4H), 7.33 – 7.27 (m, 2H), 5.50 – 5.38 (m, 1H), 5.38 – 5.32 (m, 1H), 4.86 – 4.75 (m, 2H), 4.36 (qd,  $J = 14.5, 7.8$  Hz, 2H), 4.12 (t,  $J = 6.0$  Hz, 1H), 2.23 – 2.15 (m, 2H), 1.72 (s, 3H), 1.02 (s, 9H); **<sup>13</sup>C NMR** (101 MHz, CDCl<sub>3</sub>)  $\delta$  153.5, 150.1, 135.9, 134.0, 133.6, 133.5, 133.2, 131.5, 129.9, 129.8, 127.7, 127.7, 125.1, 117.4, 108.7, 77.4, 55.6, 40.2, 27.1, 19.4, 13.2; **IR** (neat): 3067, 2933, 2860, 1497, 1428, 1156, 1107, 762 and 702 cm<sup>-1</sup>; **HRMS** (ESI-TOF): calculated for C<sub>31</sub>H<sub>40</sub>N<sub>5</sub>O<sub>3</sub>SSi [M+NH<sub>4</sub>]<sup>+</sup> 590.2621; found: 590.2621. [See NMR spectra](#)

## 2.6 Synthesis of C8-C23 fragment of Antarlides:

(5*R*,6*E*,8*E*,10*R*,13*S*,15*S*,16*R*,17*R*)-5-Allyl-13-((*tert*-butyldimethylsilyl)oxy)-17-(3-methoxyphenyl)-2,2,6,10,16,19,19,20,20-nonamethyl-3,3-diphenyl-15-((triethylsilyl)oxy)-4,18-dioxa-3,19-disilahenicososa-6,8-diene (**29**):

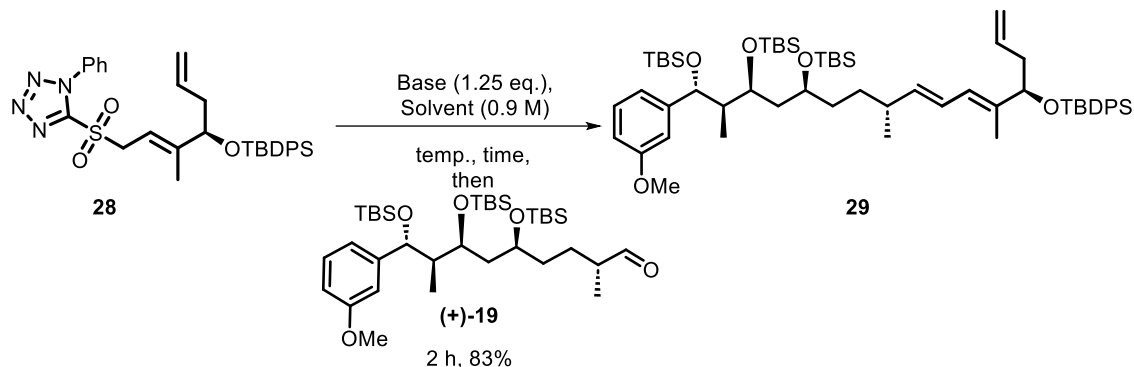

### Optimization table of Julia-Kocienski olefination:

| S.No | Base (1.25 eq.) | Solvent | Temperature | Time | 29 Yield (E/Z)  |
|------|-----------------|---------|-------------|------|-----------------|
| 1    | KHMDS           | THF     | 0 °C        | 2 h  | 60 (2:1 E/Z)    |
| 2    | KHMDS           | THF     | -78→0 °C    | 2 h  | 85% (3:1 E/Z)   |
| 3    | KHMDS           | THF     | -78 °C      | 2 h  | 83% (6:1 E/Z)   |
| 4    | KHMDS           | DME     | -78 °C      | 12 h | 70% (4:1 E/Z)   |
| 5    | LiHMDS          | THF     | 0 °C→RT     | 24 h | <15% conversion |

The sulfone **28** (0.5 g, 0.88 mmol, 1.0 eq.) was taken into flame-dried 50 mL round-bottom flask and dissolved in dry THF (5.0 mL). The resulting mixture was cooled to -78 °C, was added KHMDS (1M in THF, 1.1 mL, 1.1 mmol, 1.25 eq.) dropwise. After being stirred for 15 minutes, the crude aldehyde (+)-**19** (0.79 g, 1.18 mmol, 1.3 eq. [see S-22](#)) in THF (5 mL) was added dropwise to the reaction mixture and stirring was continued for 2 hours at -78 °C. The reaction was monitored by TLC. After completion of starting material **28**, the reaction mixture was quenched with saturated aq. NH<sub>4</sub>Cl and extracted the compound with EtOAc (2 x 25 mL), dried over Na<sub>2</sub>SO<sub>4</sub>, evaporation of solvents and purification of the residue by column chromatography on silica gel (Hexane) gave compound **29** as a colourless oil (0.74 g, 83% yield); *R<sub>f</sub>* = 0.7 (ethyl acetate/hexane 1:9); [α]<sub>D</sub><sup>20</sup> = +61.75° (*c* = 0.4 in CHCl<sub>3</sub>); <sup>1</sup>H NMR (400 MHz, CDCl<sub>3</sub>, 6:1 E/Z, major stereoisomer) δ 7.73 – 7.65 (m, 2H), 7.65 – 7.58 (m, 2H), 7.42 – 7.30 (m, 6H), 7.19 (t, *J* = 7.9 Hz, 1H), 6.86 – 6.72 (m, 3H), 6.16 – 6.01 (m, 2H), 5.65 – 5.49 (m, 1H), 5.19 (t, *J* = 10 Hz, 1H), 4.91 – 4.83 (m, 2H), 4.47 (d, *J* = 9.0 Hz, 1H), 4.36 (t, *J* = 6.4 Hz, 1H), 4.12 (t, *J* = 6.1 Hz, 1H), 3.79 (s, 3H), 3.76 – 3.69 (m, 1H), 2.57 – 2.34 (m, 1H), 2.31 – 2.20 (m, 2H), 2.04 – 1.90 (m, 1H), 1.79 – 1.66 (m, 2H), 1.65 (s, 3H), 1.53 – 1.37 (m, 2H),

1.36 – 1.23 (m, 2H), 1.06 (s, 9H), 0.95 – 0.87 (m, 21H), 0.82 (s, 9H), 0.49 (d,  $J = 7.0$  Hz, 3H), 0.14 (s, 3H), 0.1 (s, 3H), 0.09 (s, 3H), 0.06 (s, 3H), 0.02 (s, 3H), -0.37 (s, 3H);  $^{13}\text{C}$  NMR (101 MHz,  $\text{CDCl}_3$ , 6:1 E/Z, major stereoisomer)  $\delta$  159.5 (C), 146.2 (C), 138.5 (C), 138.0 (CH), 136.1 (4 x CH), 134.8 (CH), 134.6 (C), 134.1 (C), 129.7 (CH), 129.6 (CH), 129.0 (CH), 127.55 (2 x CH), 127.50 (2 x CH), 123.0 (CH), 121.0 (CH), 120.5 (CH), 116.6 ( $\text{CH}_2$ ), 113.3 (CH), 112.7 (CH), 78.4 (CH), 77.3 (CH), 70.2 (CH), 69.1 (CH), 55.2 ( $\text{CH}_3$ ), 46.1 (CH), 43.2 ( $\text{CH}_2$ ), 40.9 ( $\text{CH}_2$ ), 34.7 ( $\text{CH}_2$ ), 33.0 ( $\text{CH}_2$ ), 32.2 (CH), 27.2 (3 x  $\text{CH}_3$ ), 26.3 (3 x  $\text{CH}_3$ ), 26.19 (3 x  $\text{CH}_3$ ), 26.18 (3 x  $\text{CH}_3$ ), 21.4 ( $\text{CH}_3$ ), 19.6 (C), 18.5 (C), 18.3 (C), 18.2 (C), 12.6 ( $\text{CH}_3$ ), 10.0 ( $\text{CH}_3$ ), -3.0 ( $\text{CH}_3$ ), -3.5 ( $\text{CH}_3$ ), -3.9 ( $\text{CH}_3$ ), -4.0 ( $\text{CH}_3$ ), -4.1 ( $\text{CH}_3$ ), -4.2 ( $\text{CH}_3$ ); IR (neat): 2939, 2861, 1468, 1258, 1063, 839, 770 and 704  $\text{cm}^{-1}$ ; HRMS (ESI-TOF): calculated for  $\text{C}_{60}\text{H}_{104}\text{NO}_5\text{Si}_4$   $[\text{M}+\text{NH}_4]^+$  1030.6986; found: 1030.6984. [See NMR spectra](#)

### 3. References:

1. T. Akeboshi, Y. Ohtsuka, T. Ishihara and T. Sugai, *Adv. Synth. Catal.* 2001, **343**, 6–7.
2. M. E. Casao, G. Licini and M. Orlandi, *J. Am. Chem. Soc.* 2021, **143**, 3289–3294.
3. A. D. Fotiadou and A. L. Zografos, *Org. Lett.* 2011, **13**, 4592–4595.

#### 4. $^1\text{H}$ NMR, $^{13}\text{C}$ NMR & $^{19}\text{F}$ NMR Spectra for New Compounds:

**(R)-3-((4-Methoxybenzyl)oxy)-2-methylpropan-1-ol [(+)-4a]:** [See procedure](#)

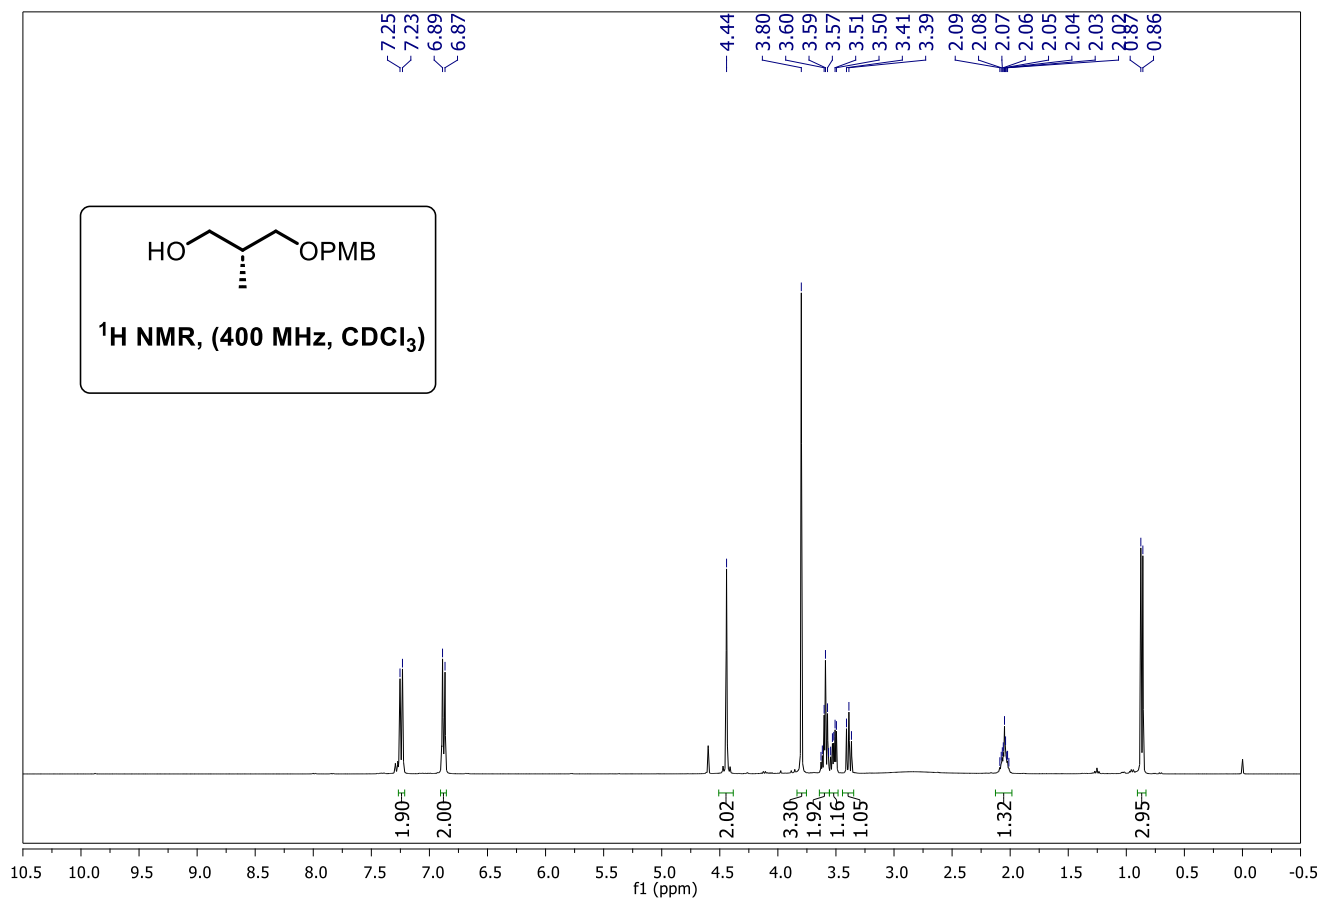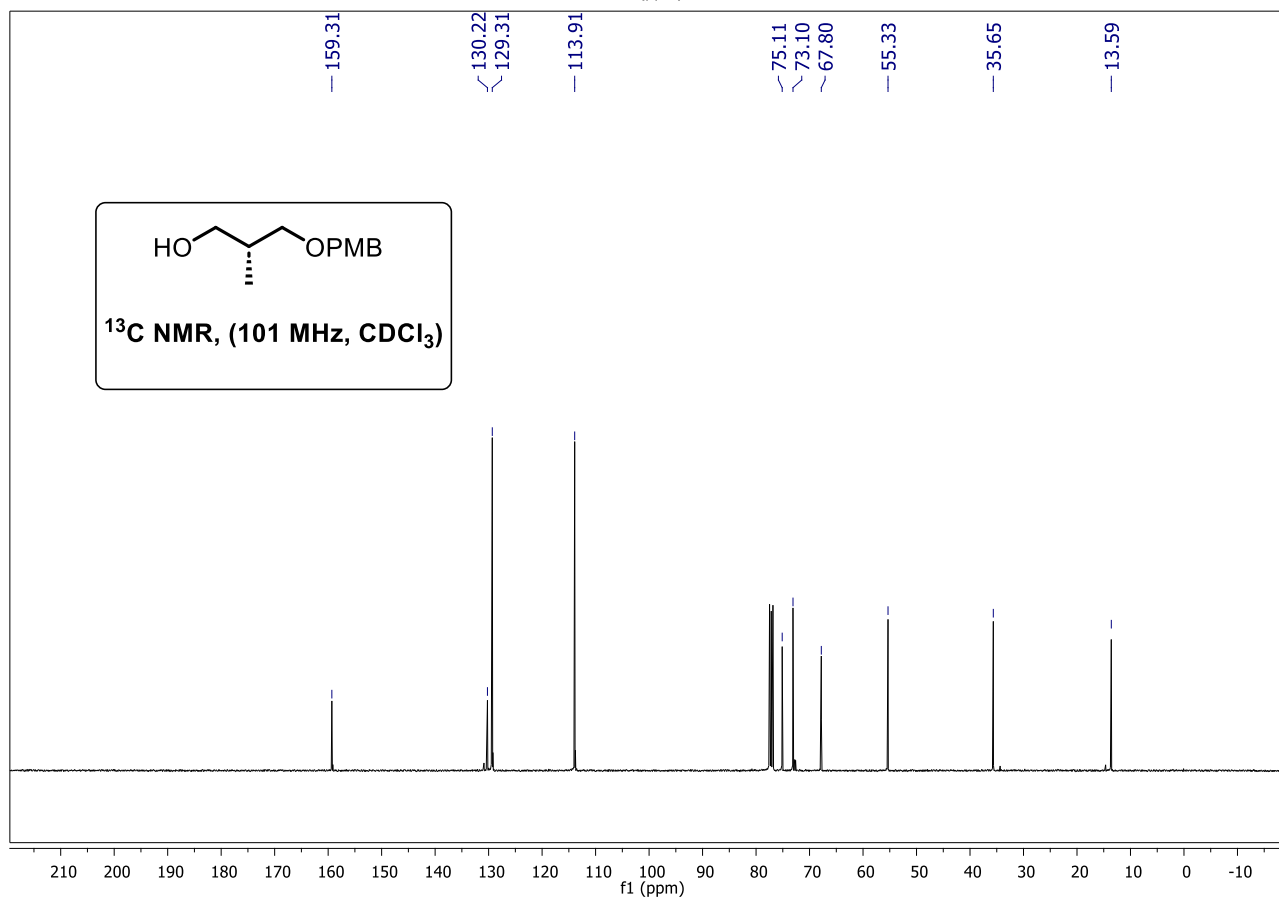

(S)-3-((4-Methoxybenzyl)oxy)-2-methylpropyl 4-methylbenzenesulfonate (5): [Procedure](#)

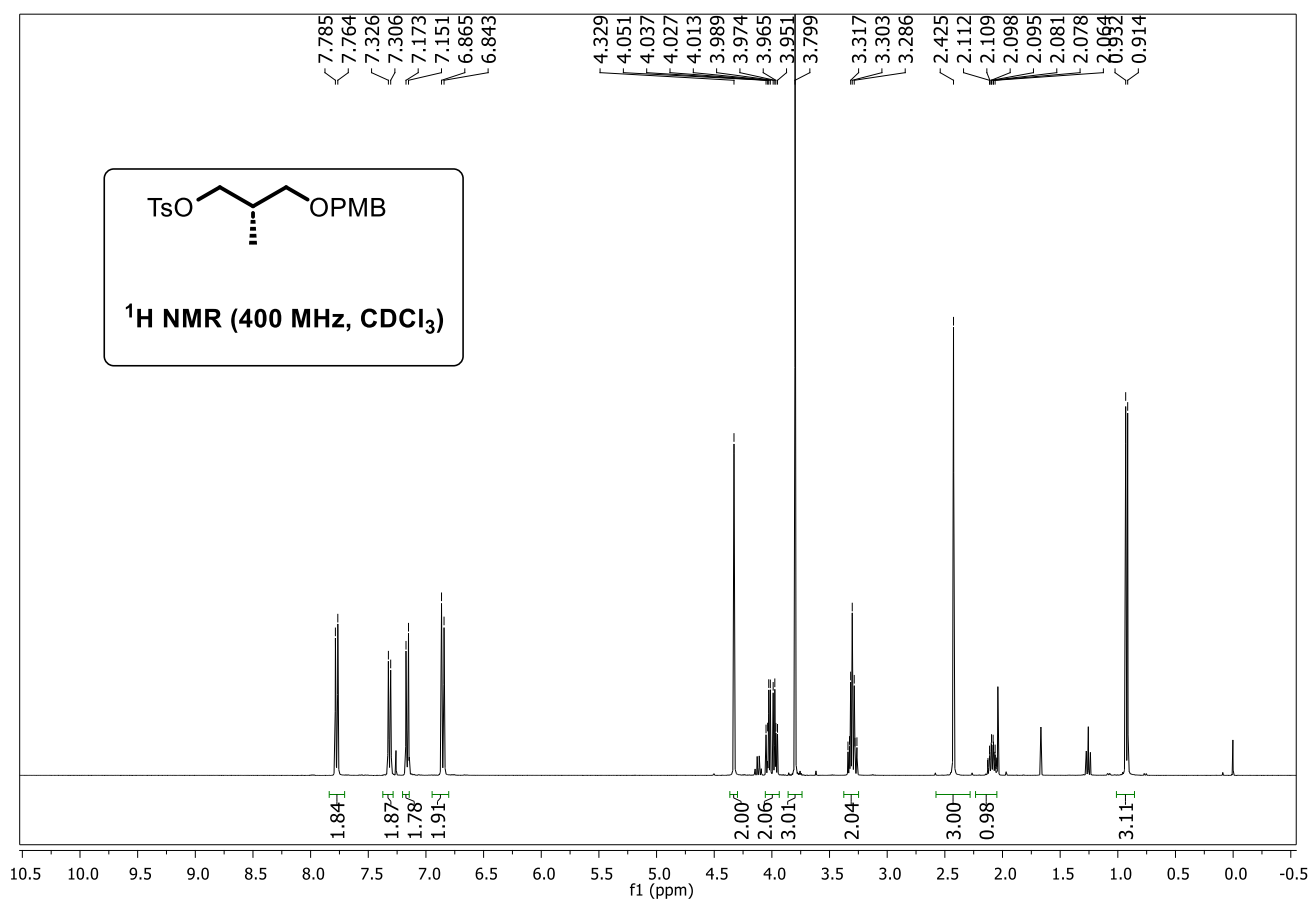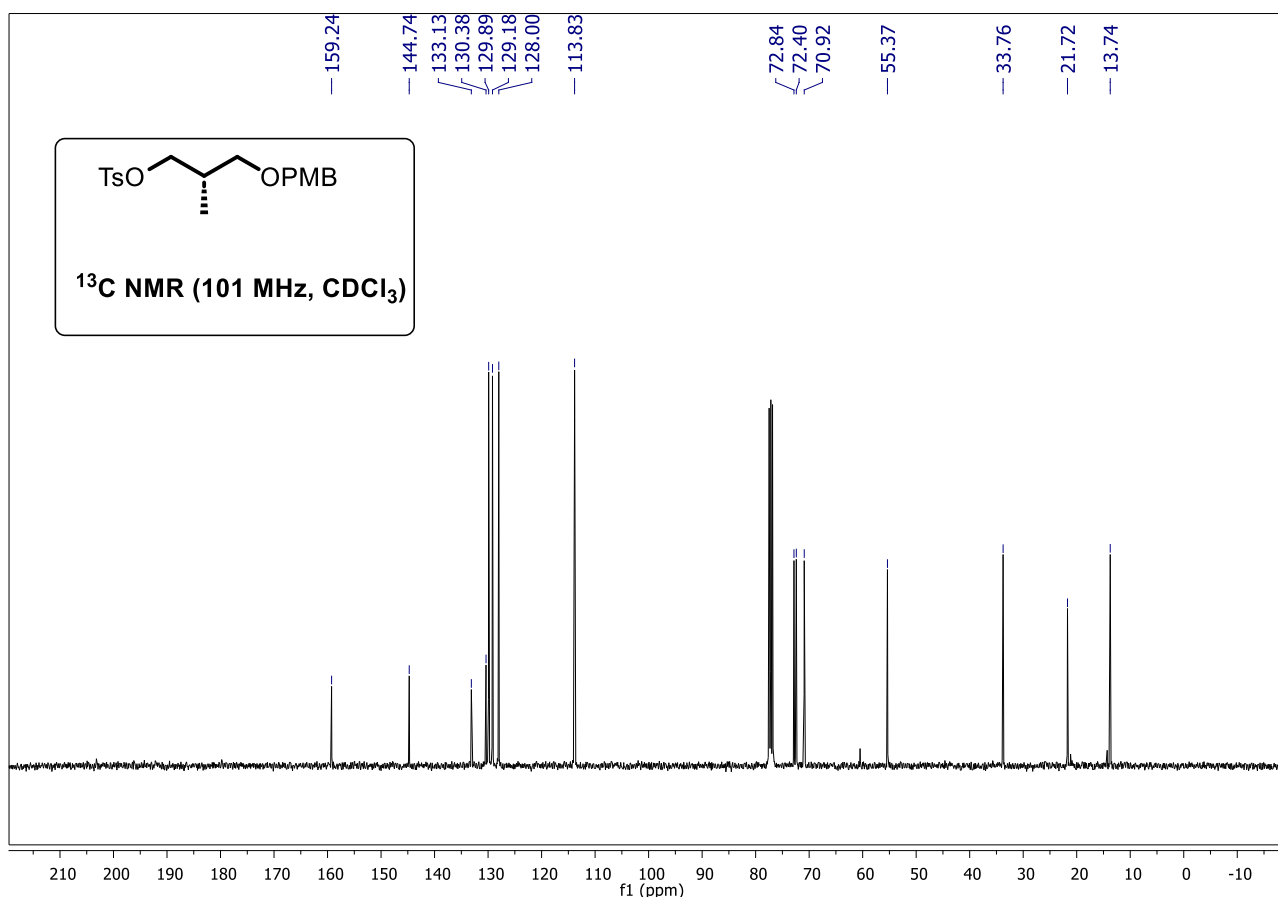

**(R)-1-Methoxy-4-(((2-methylhex-5-en-1-yl)oxy)methyl)benzene (6):** *See procedure*

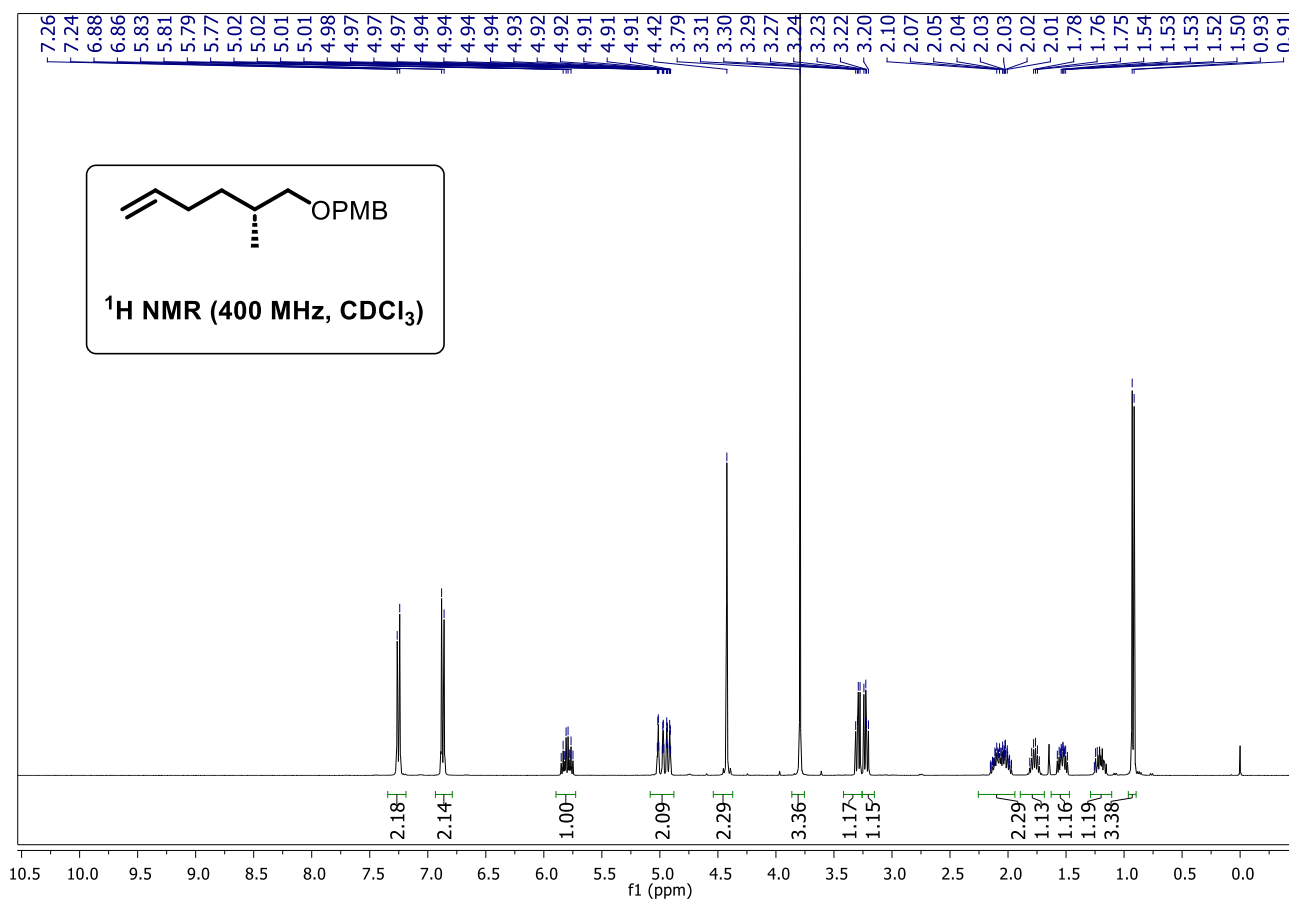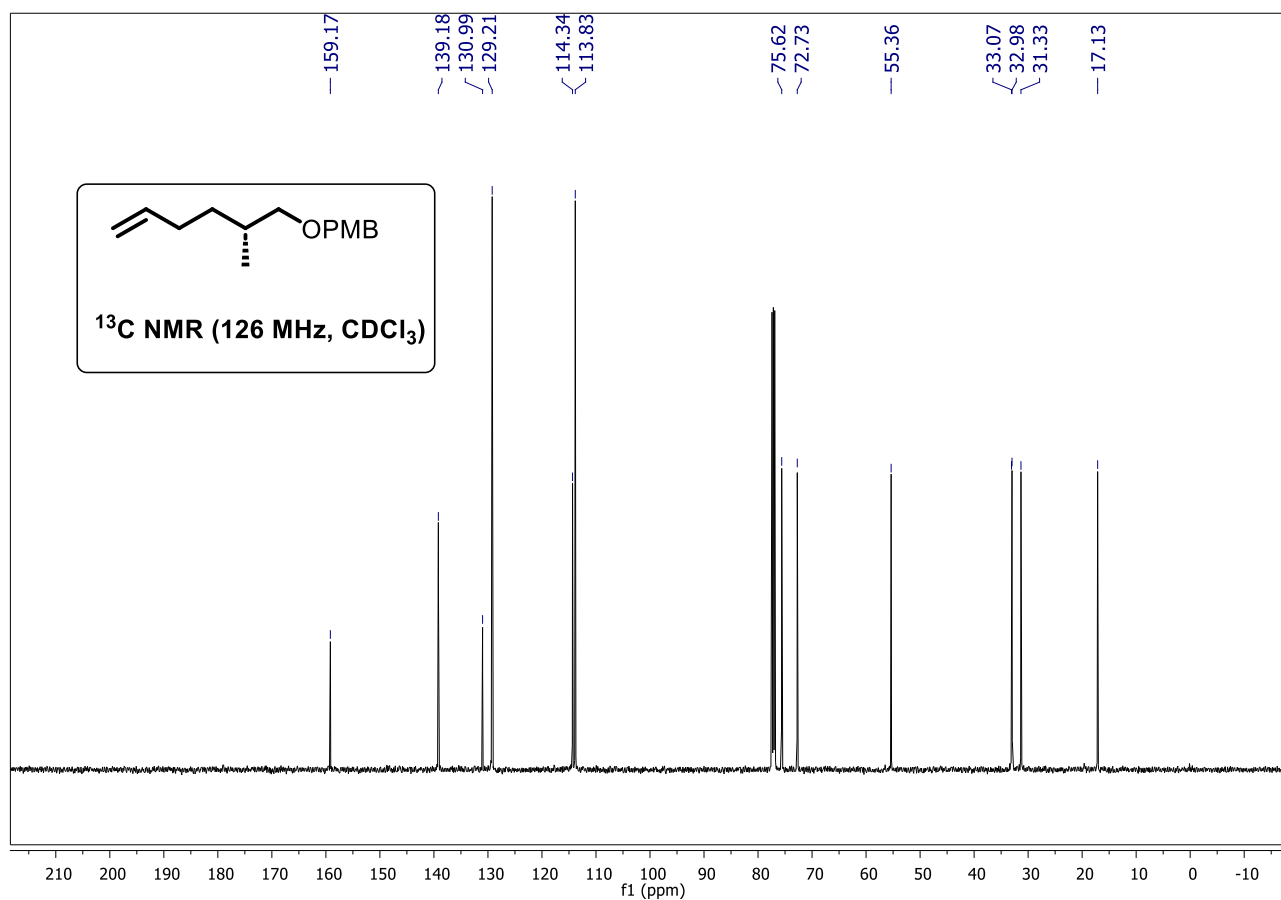

**(R)-5-((4-Methoxybenzyl)oxy)-4-methylpentanal [(+)-7]:** *See procedure*

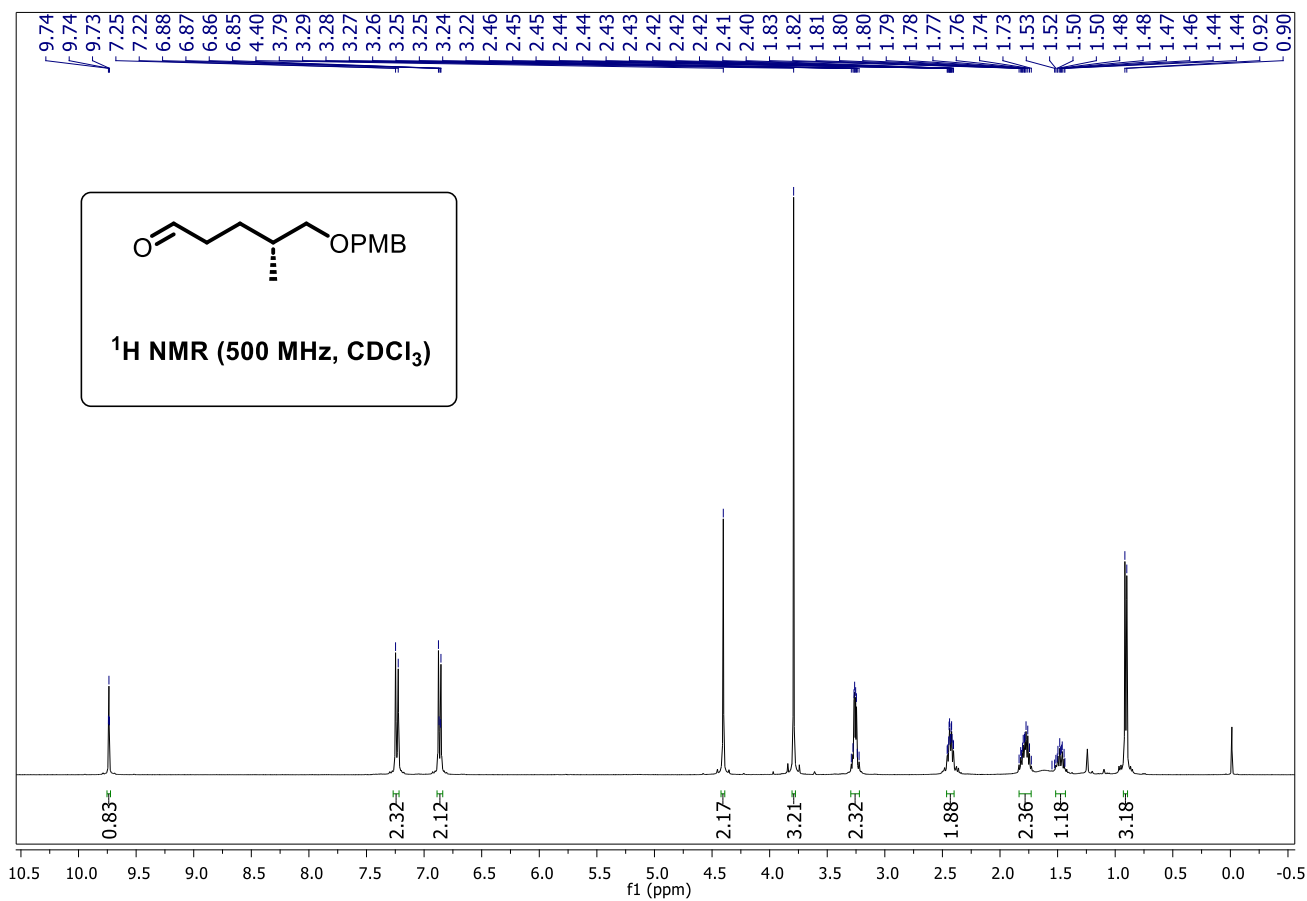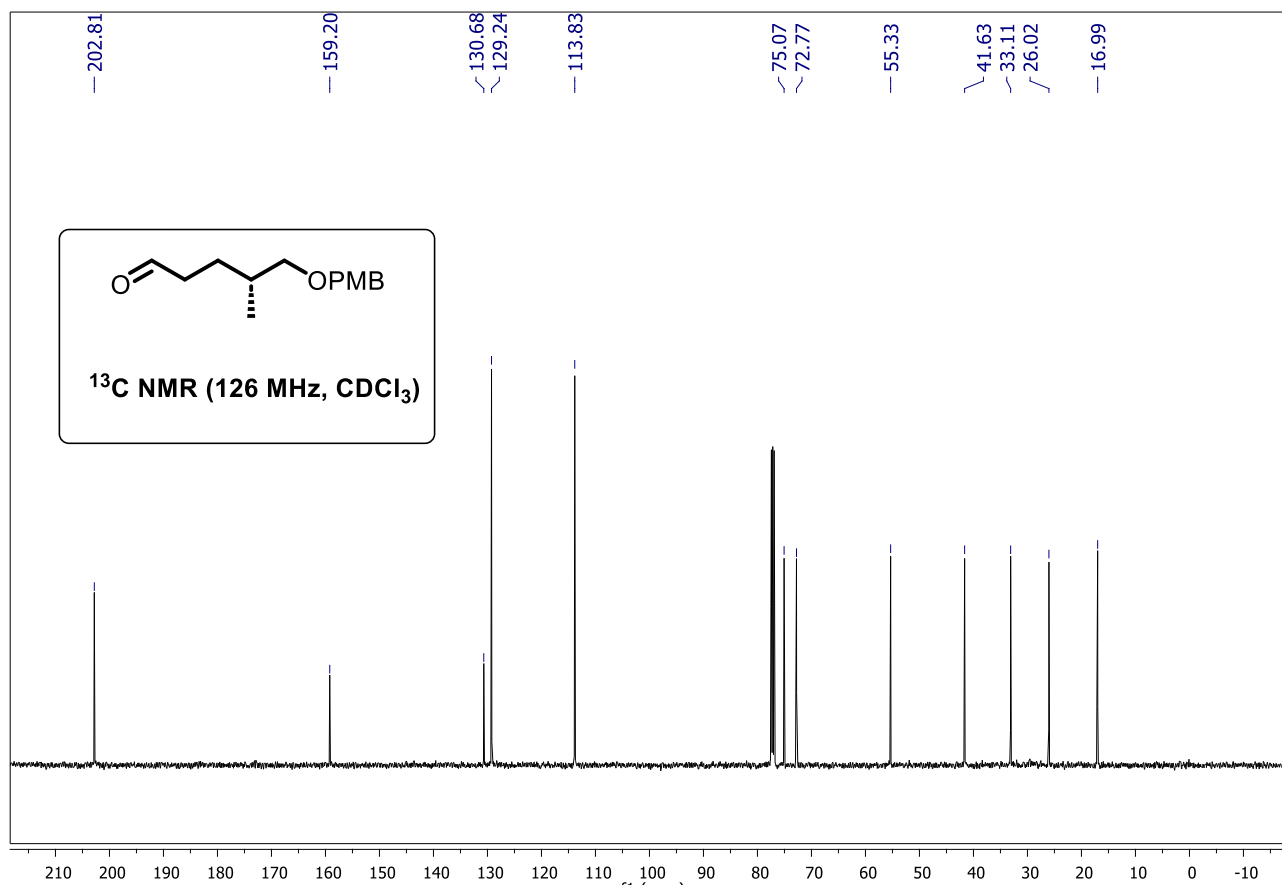

**(R)-3-Hydroxy-2-methylpropyl acetate [(+)-4b]:** [See procedure](#)

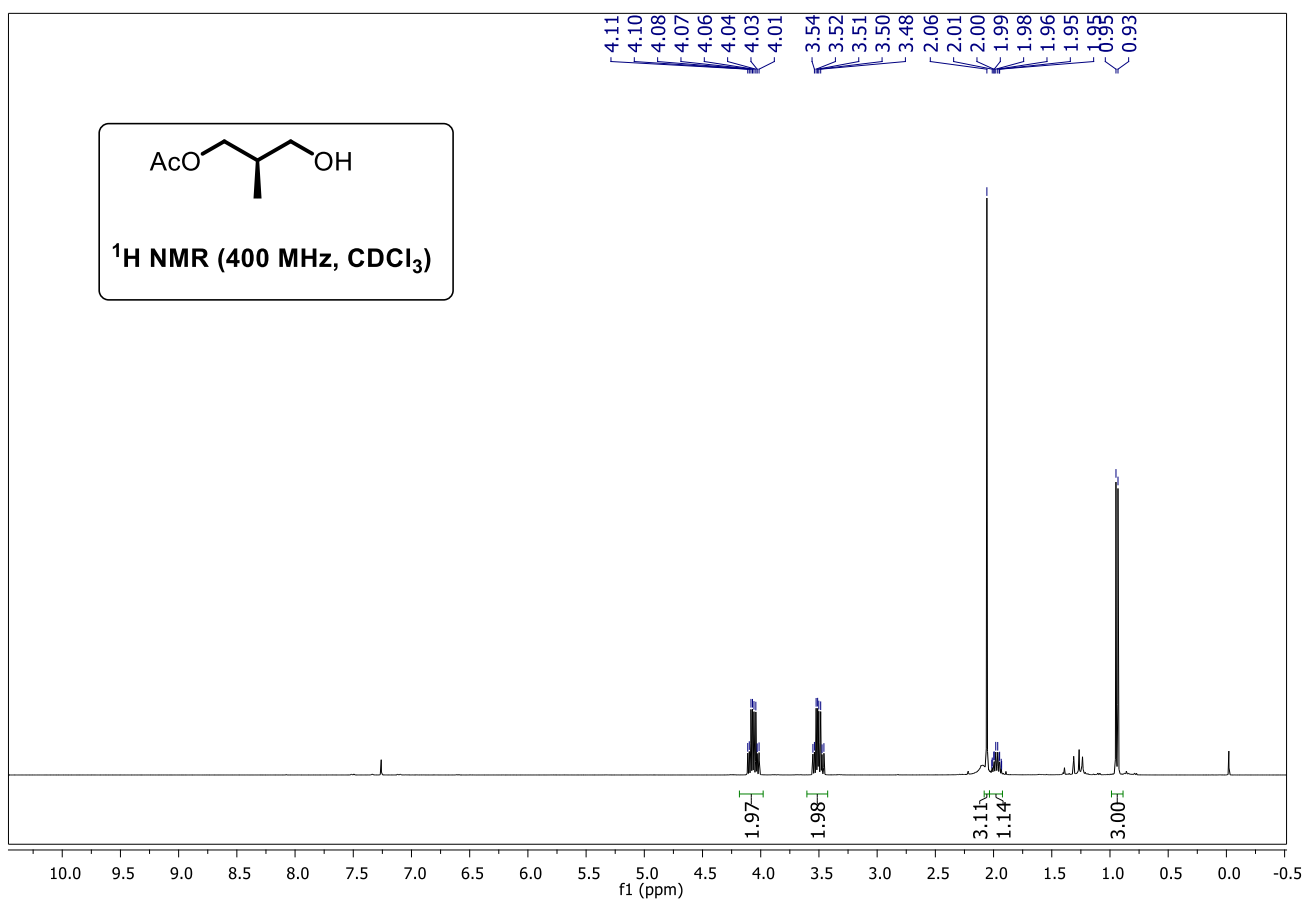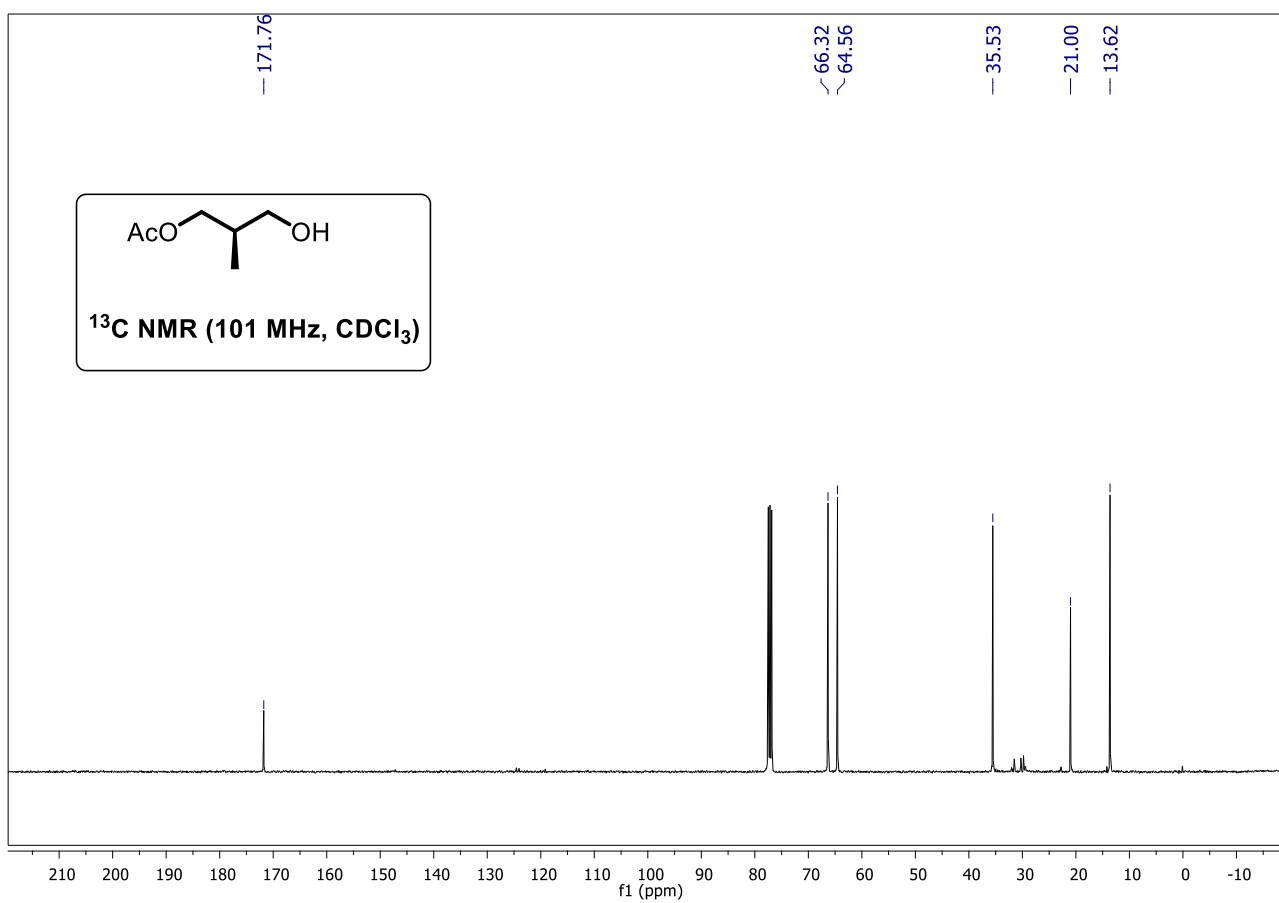



**(S)-2-Methyl-3-(tosyloxy)propyl acetate (SI-1):** [See procedure](#)

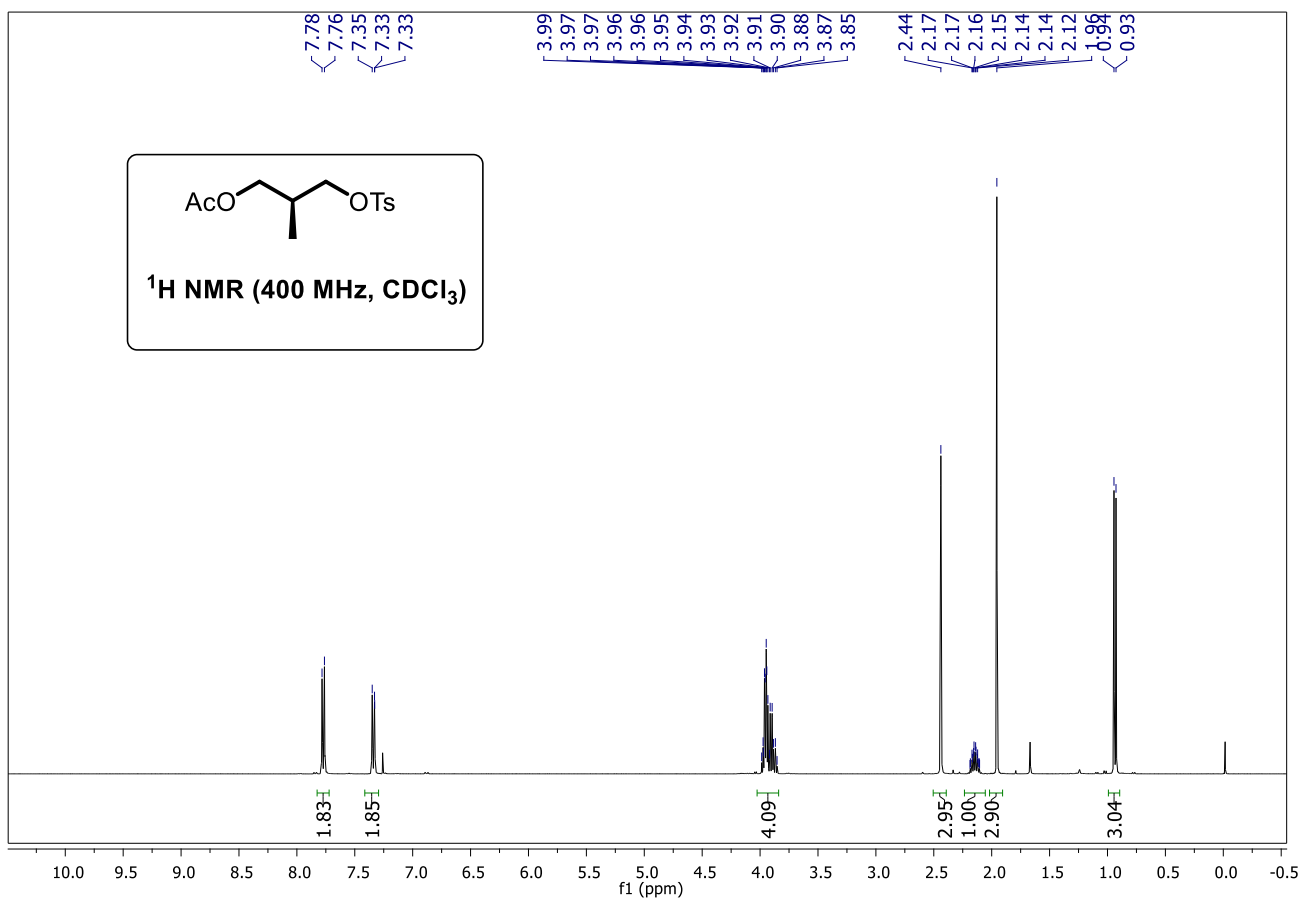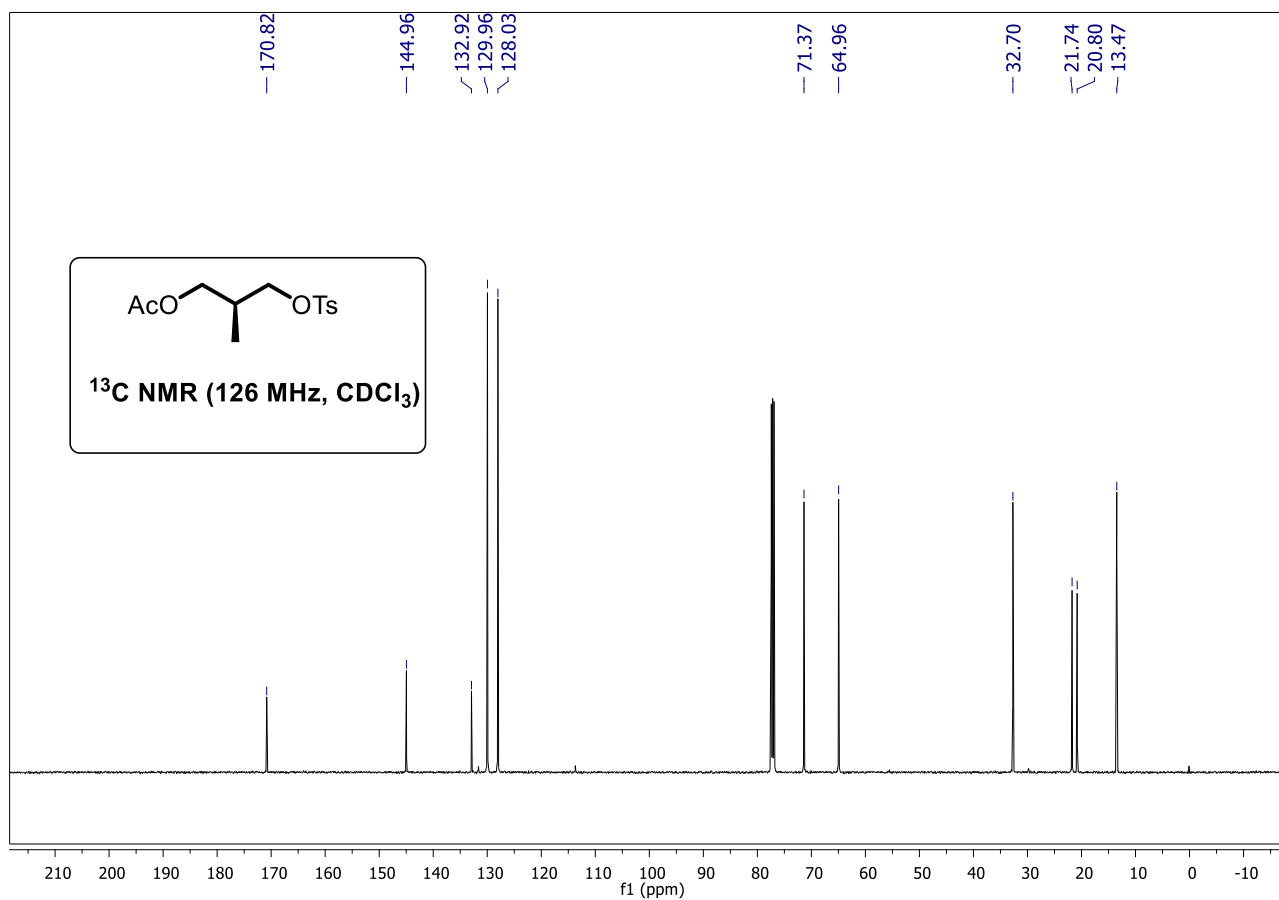

(S)-3-Hydroxy-2-methylpropyl 4-methylbenzenesulfonate (SI-2): [See procedure](#)

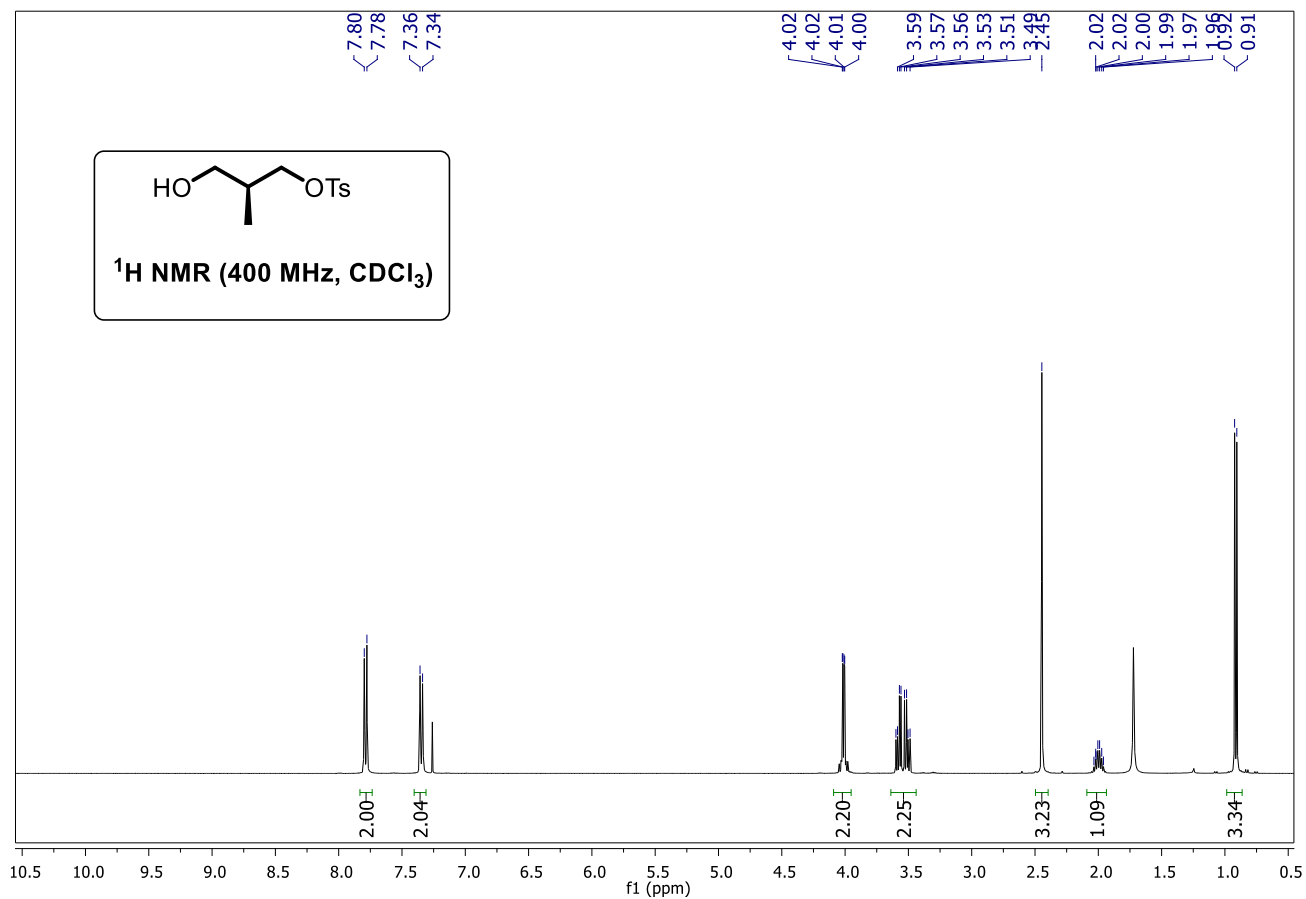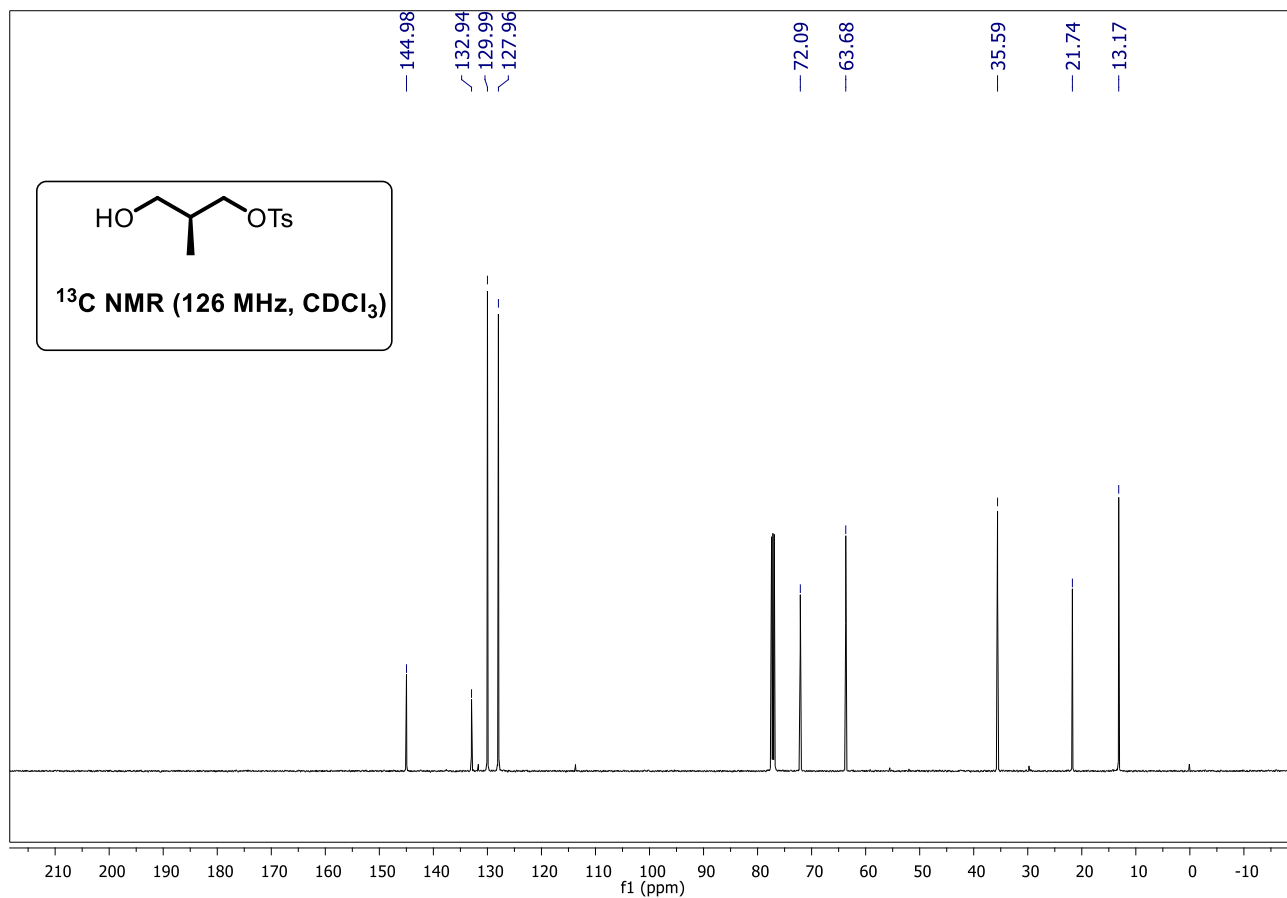

(4*S*,7*R*)-8-((4-Methoxybenzyl)oxy)-7-methyloct-1-en-4-ol (8): [See procedure](#)

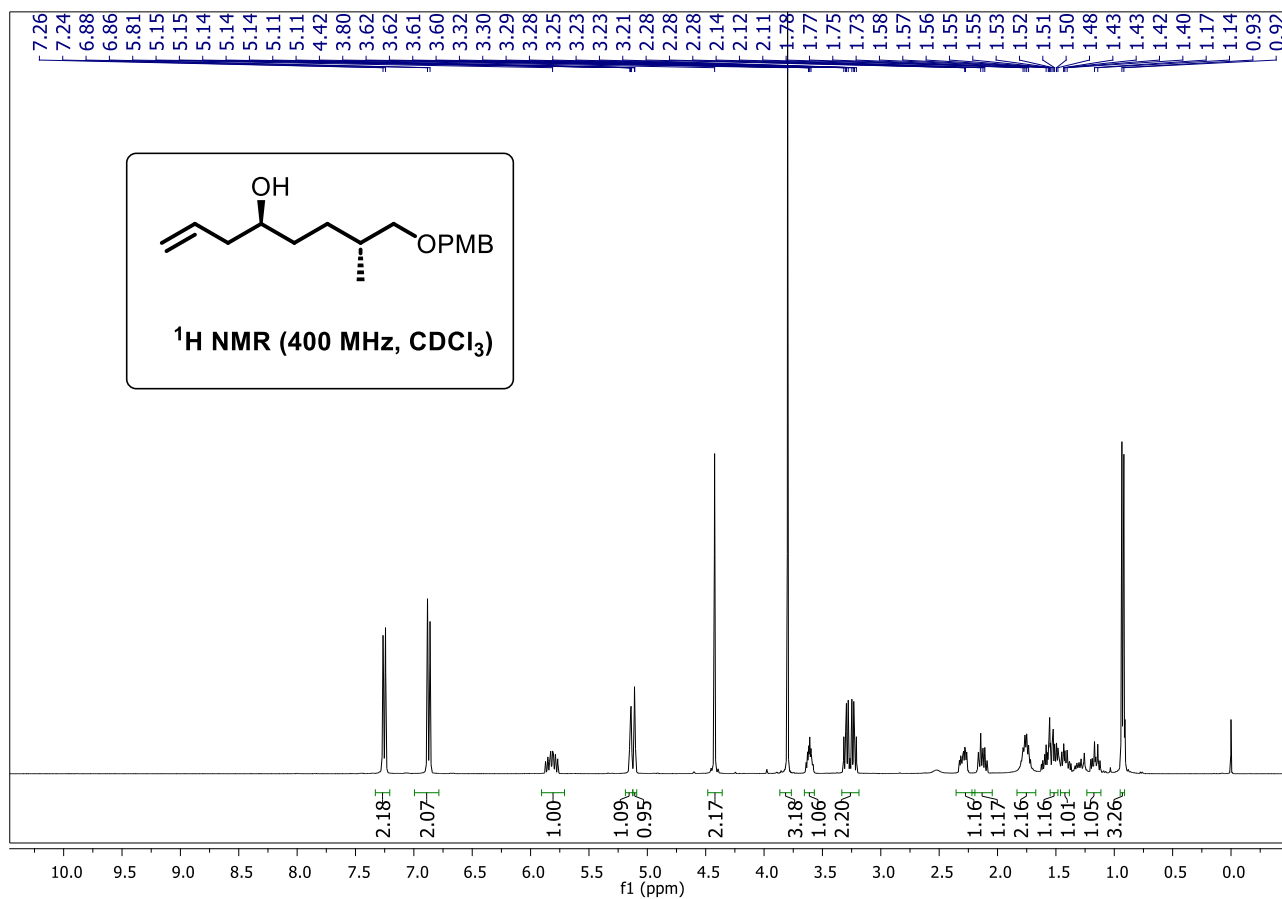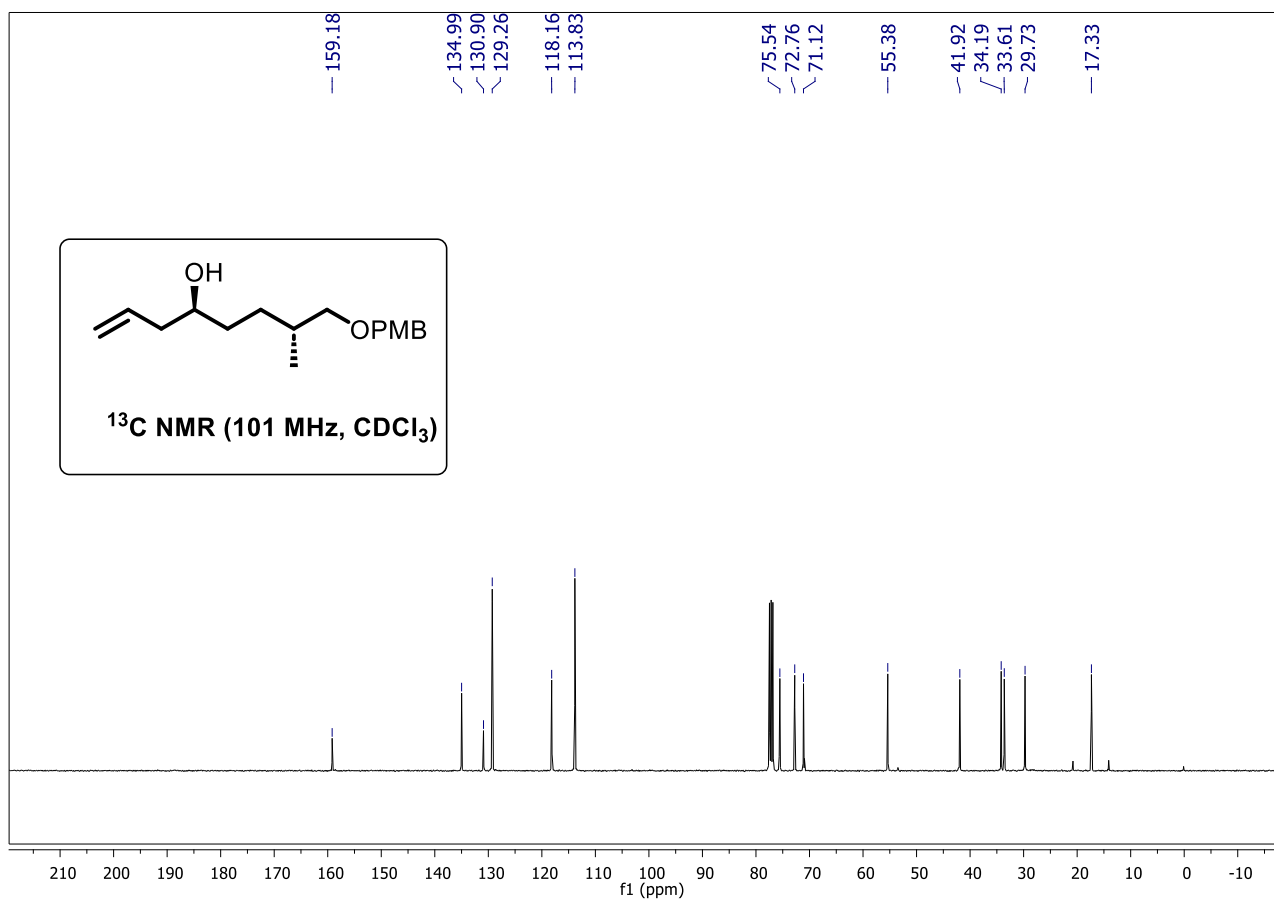

**(4*S*,7*R*)-8-((4-Methoxybenzyl)oxy)-7-methyloct-1-en-4-yl (S)-3,3,3-trifluoro-2-methoxy-2-phenylpropanoate (SI-3): [See procedure](#)**

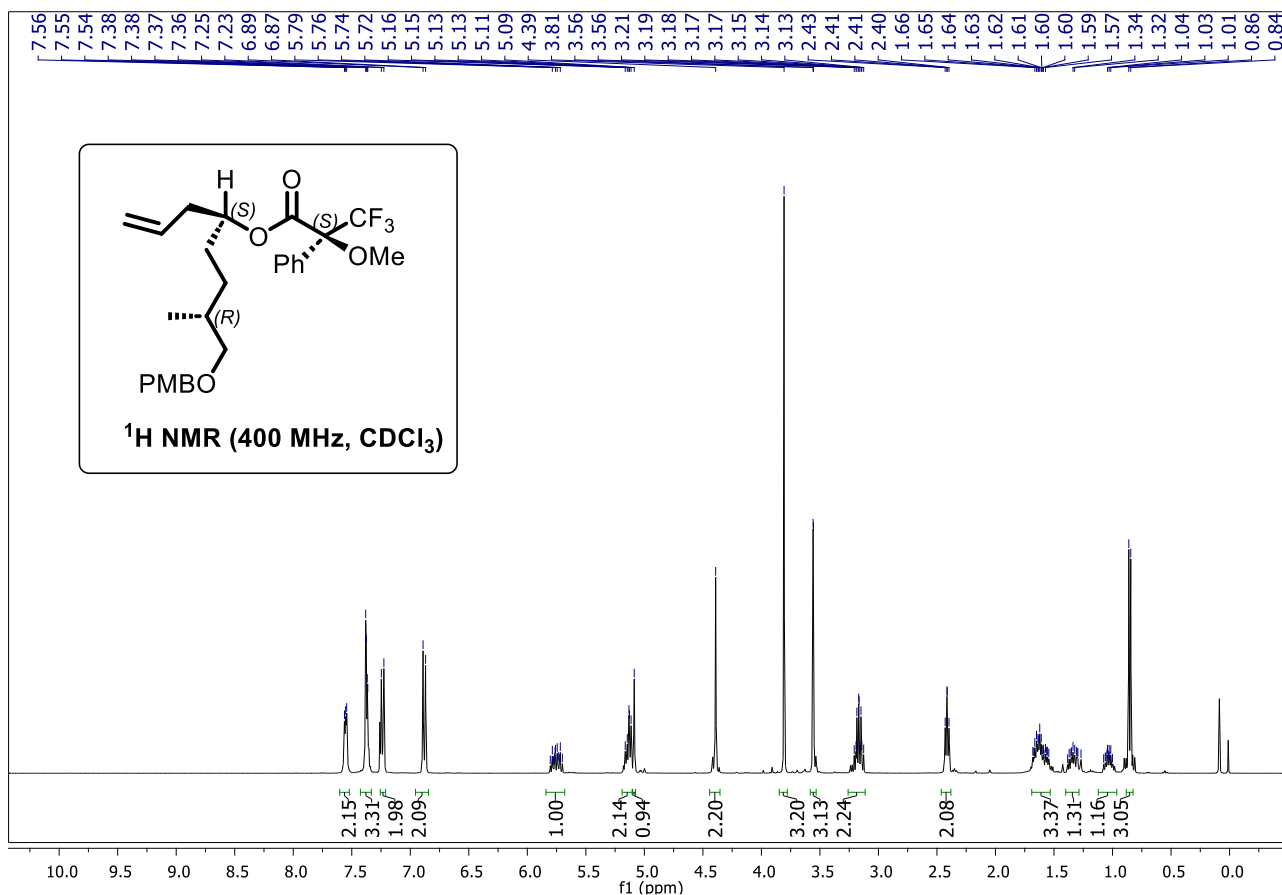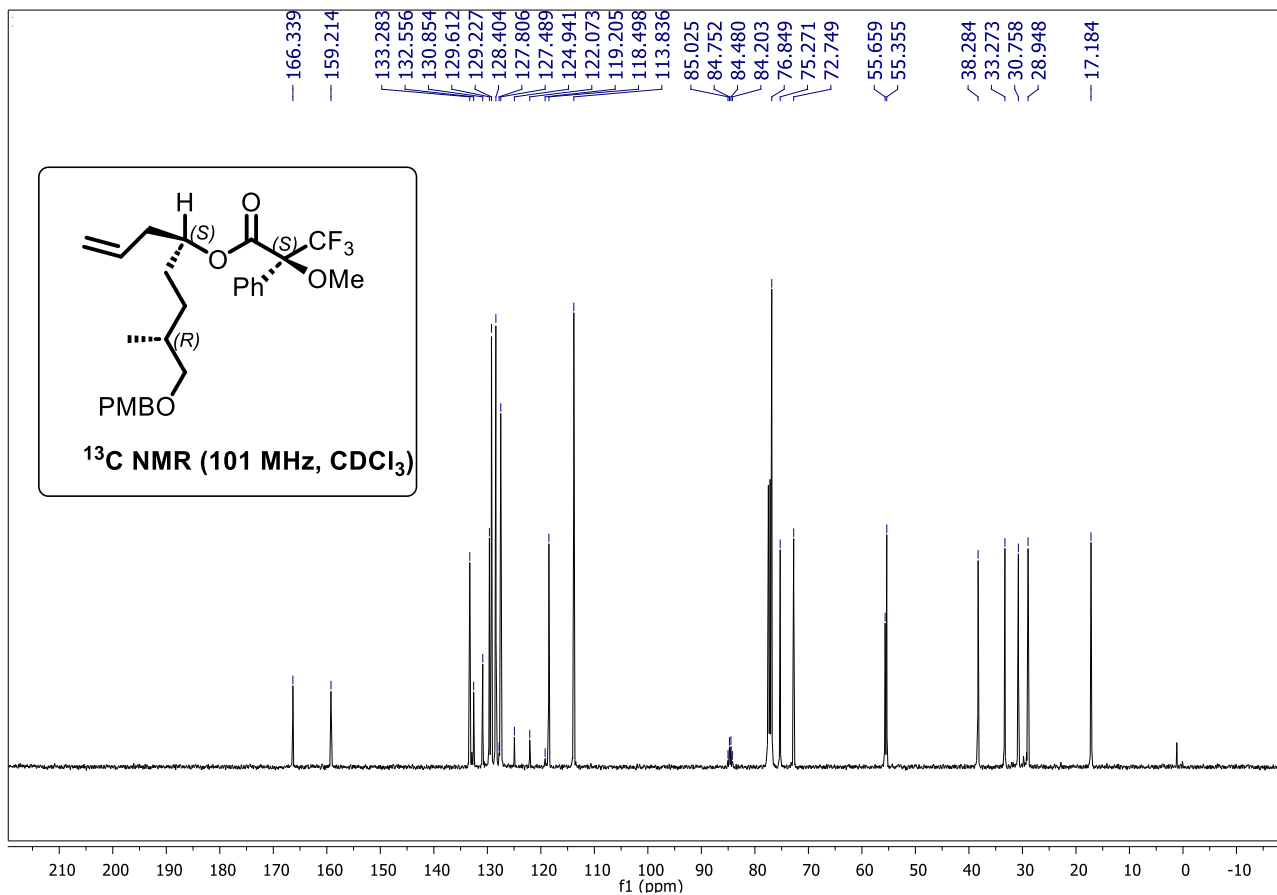

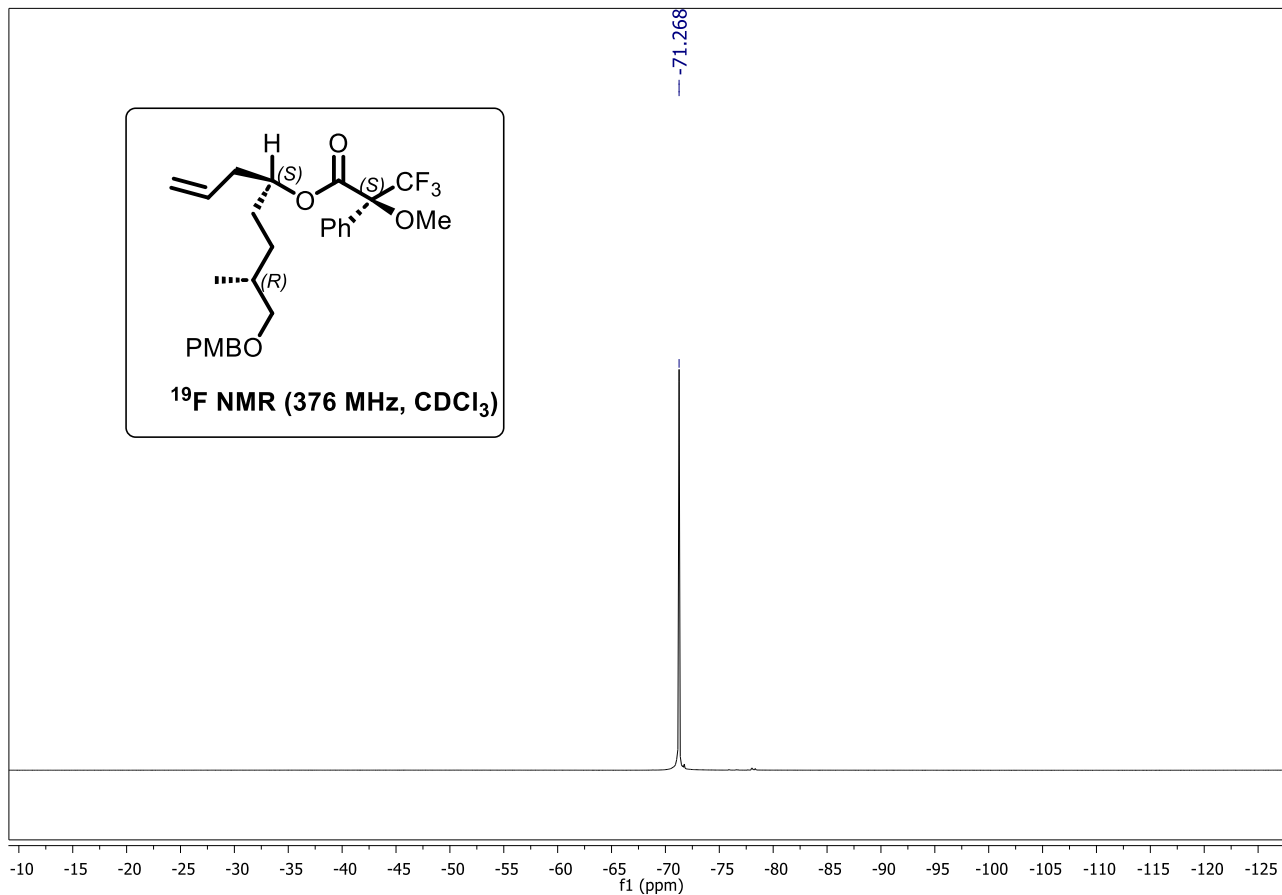

**(4*S*,7*R*)-8-((4-Methoxybenzyl)oxy)-7-methyloct-1-en-4-yl (*R*)-3,3,3-trifluoro-2-methoxy-2-phenylpropanoate (SI-4): [See procedure](#)**

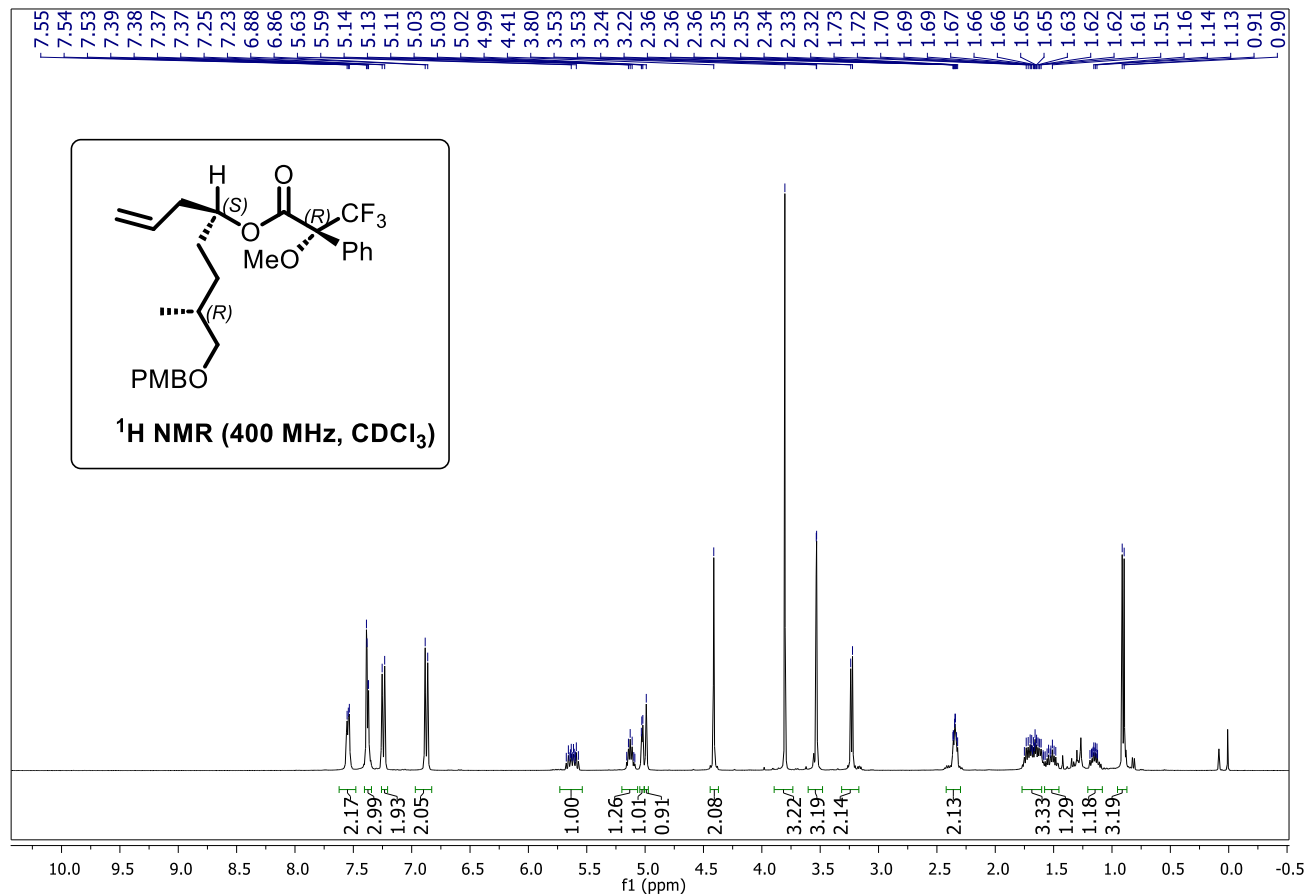

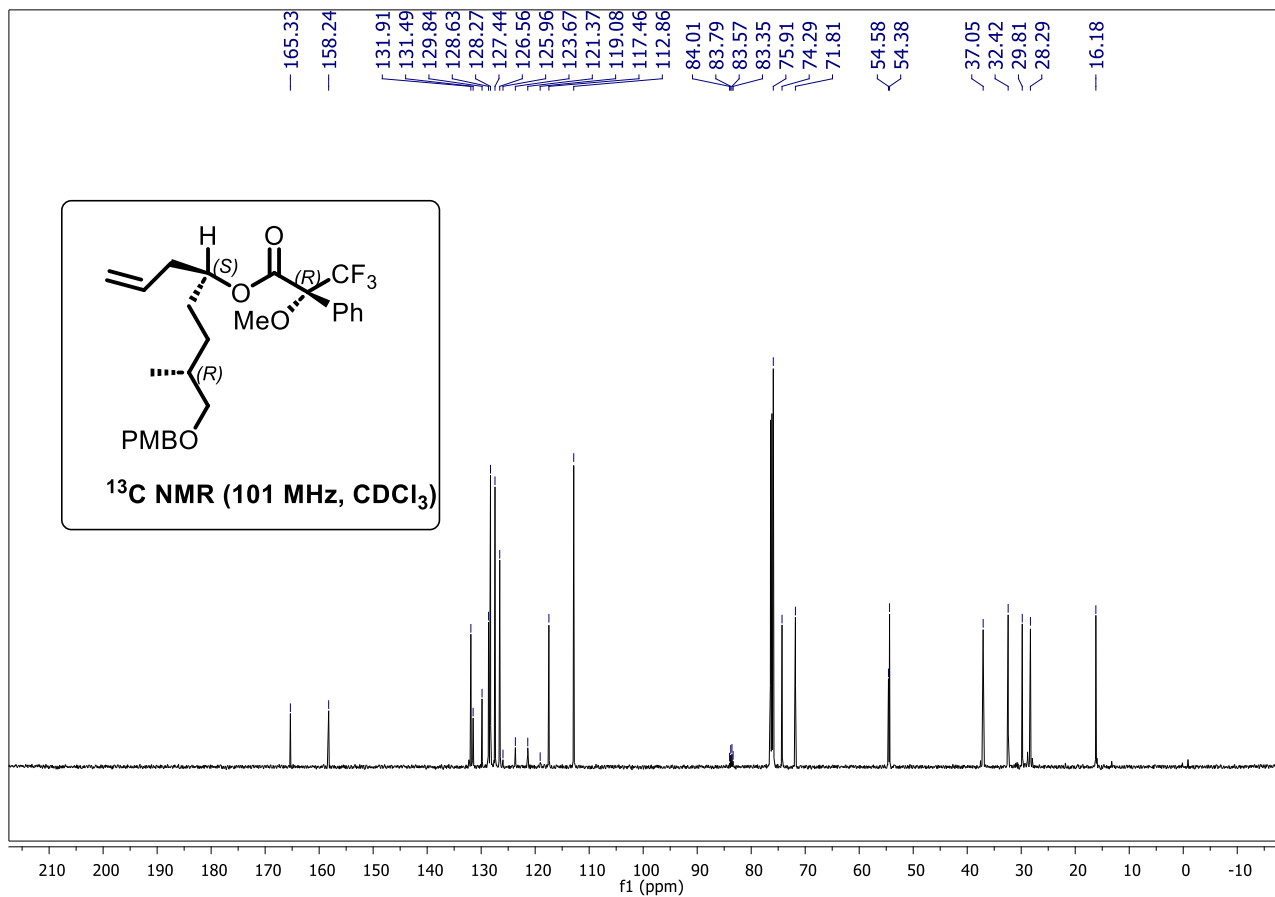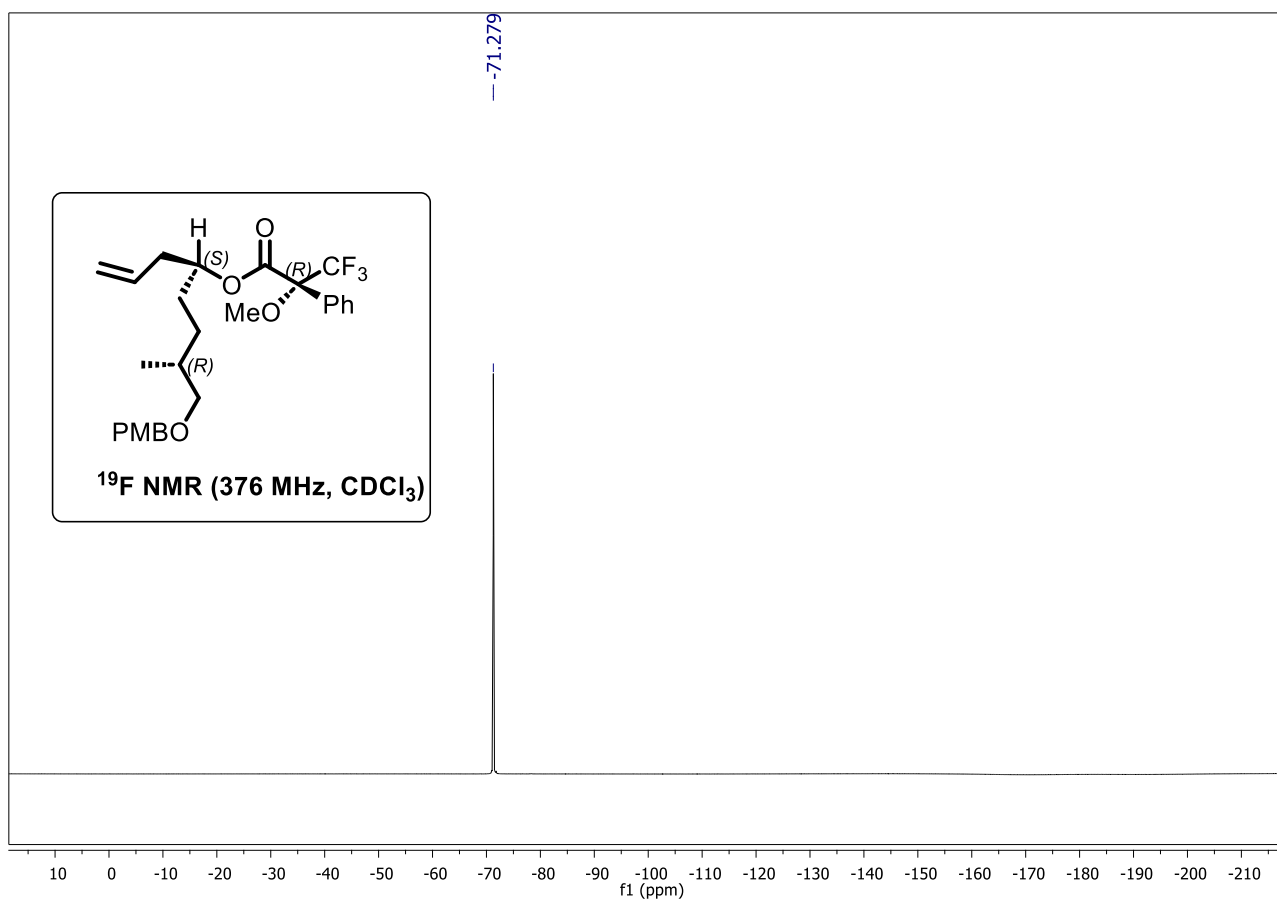

***tert*-Butyl(((4*S*,7*R*)-8-((4-methoxybenzyl)oxy)-7-methyloct-1-en-4-yl)oxy)dimethylsilane (9):**

[See procedure](#)

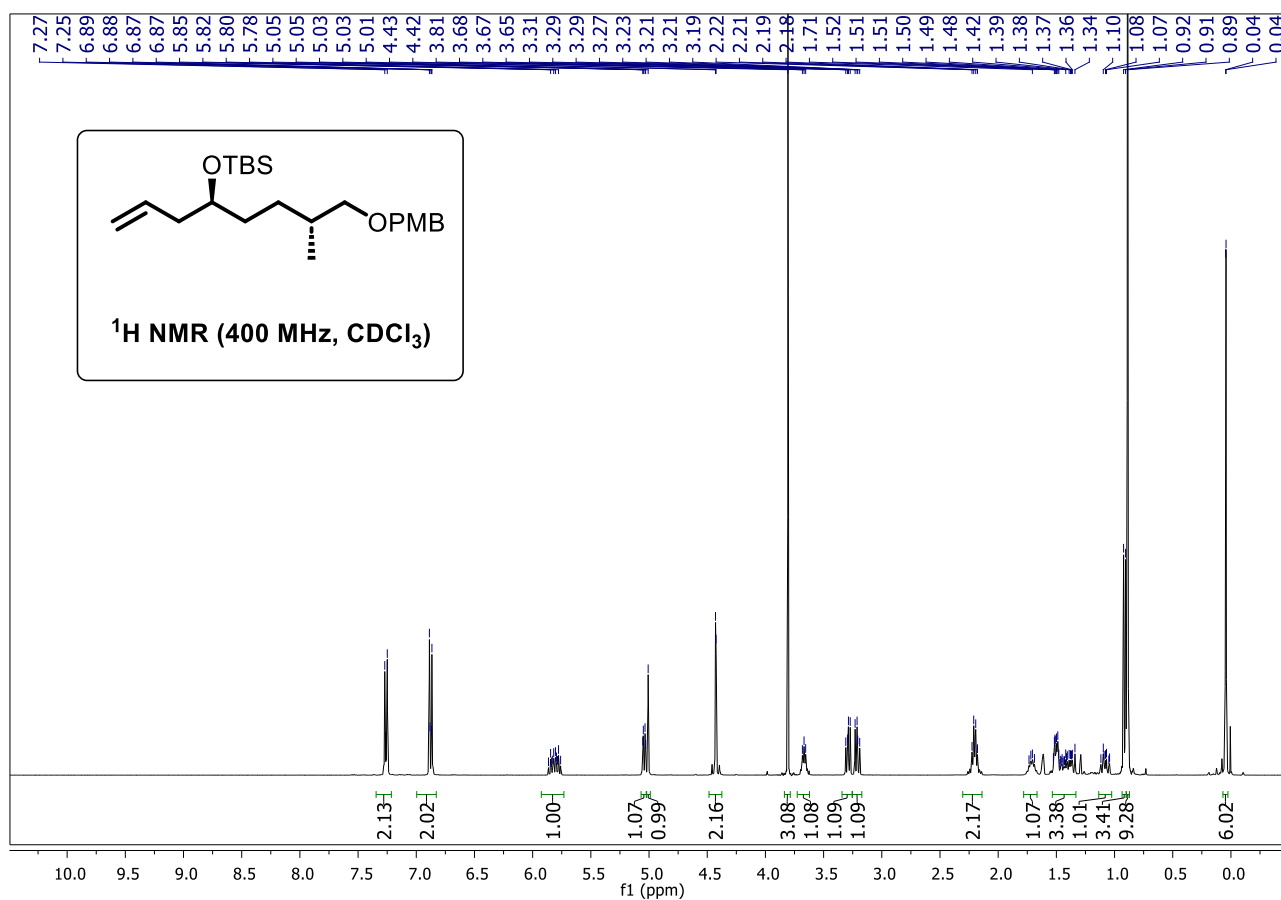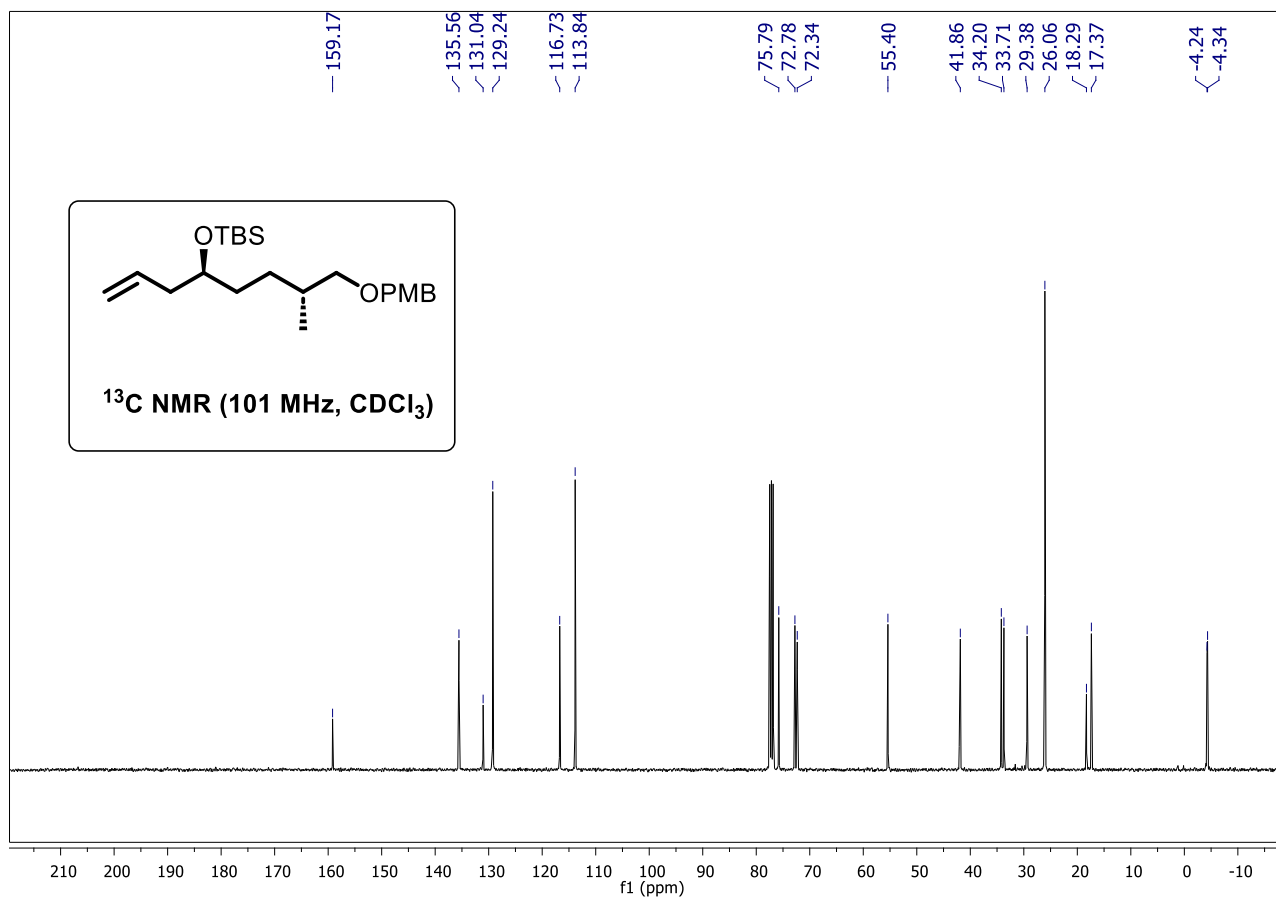

**(3*S*,6*R*)-3-((*tert*-Butyldimethylsilyl)oxy)-7-((4-methoxybenzyl)oxy)-6-methylheptanal [(+)-10]: [See procedure](#)**

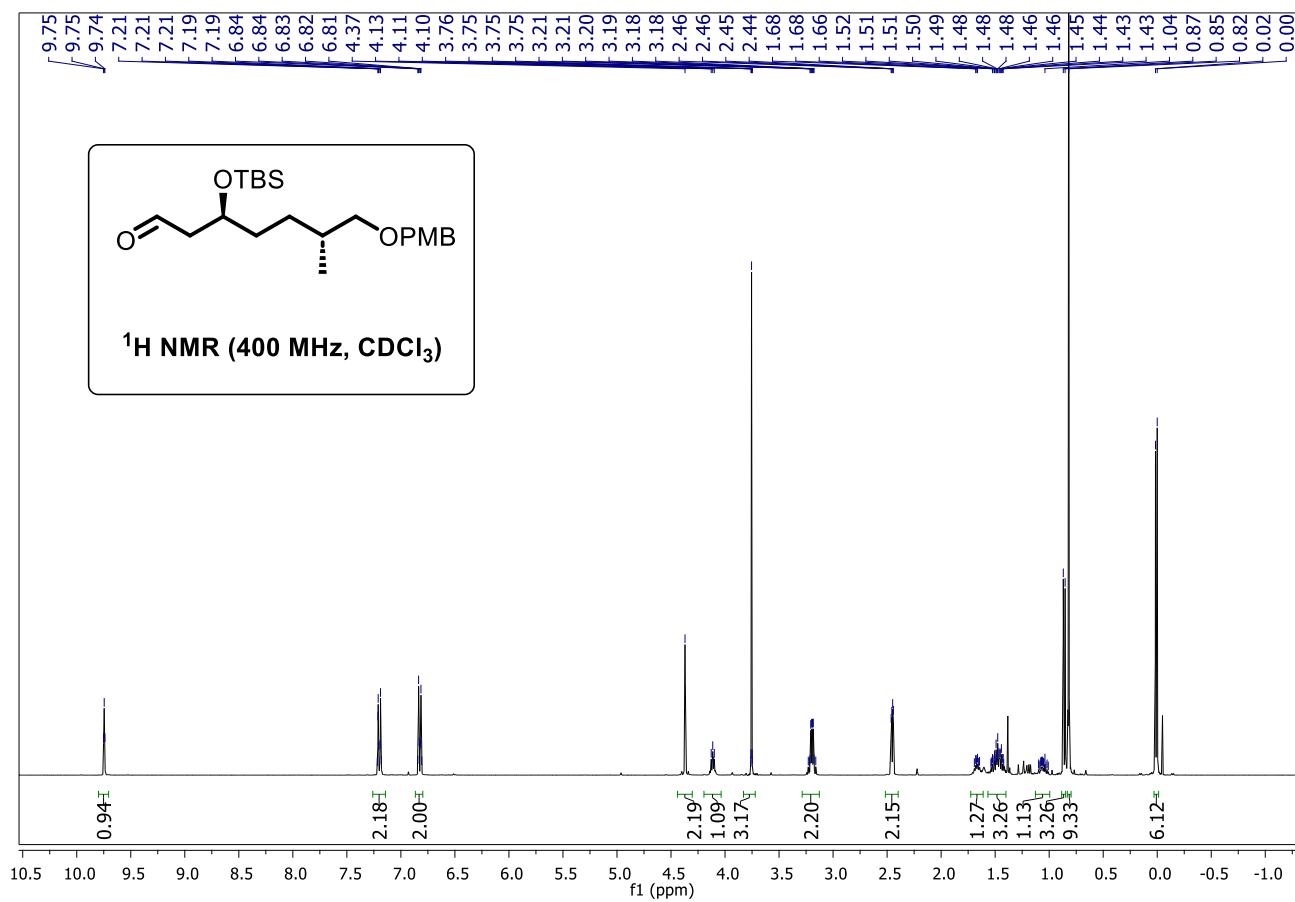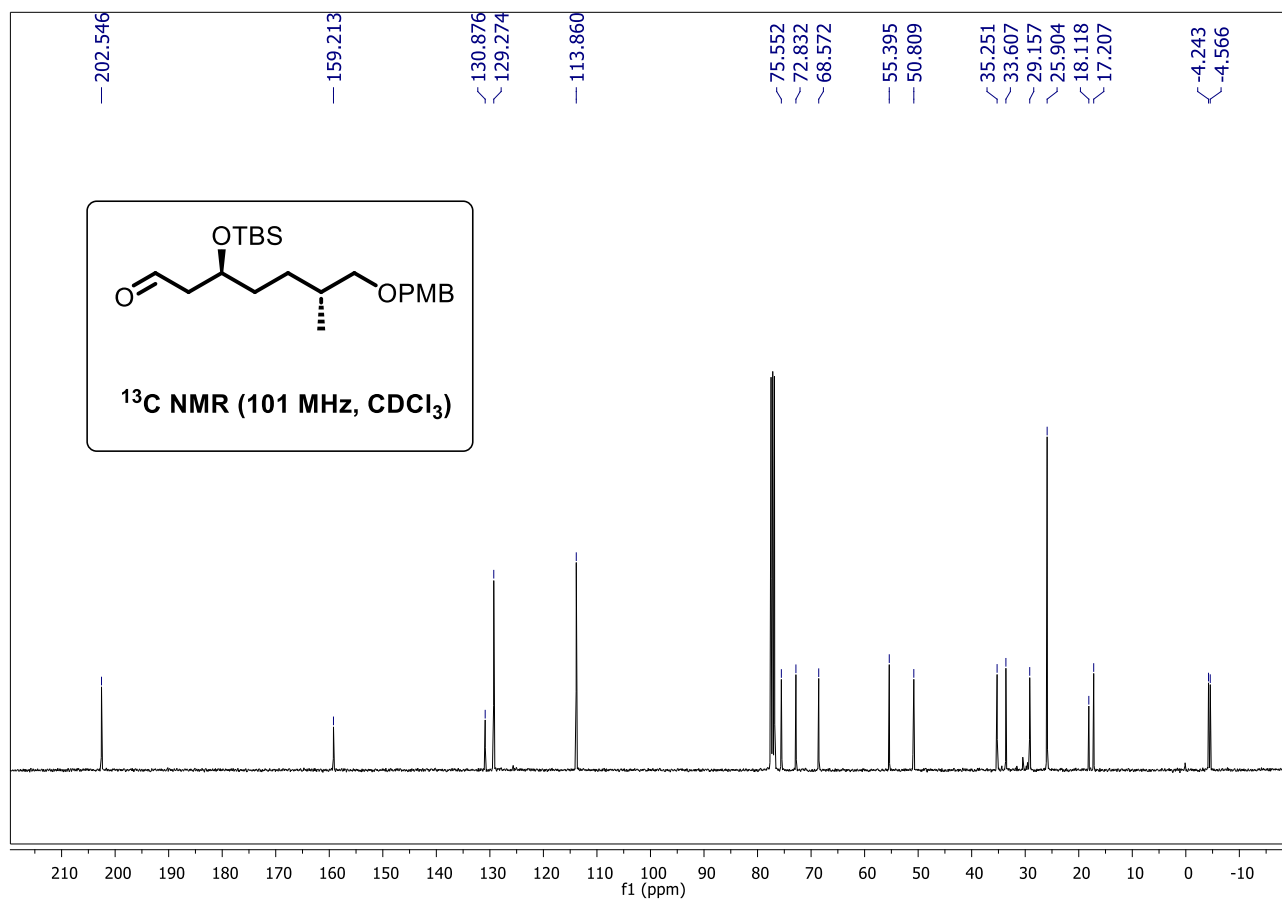



1-(3-(Methoxymethoxy)phenyl)propan-1-one (SI-6): [See procedure](#)

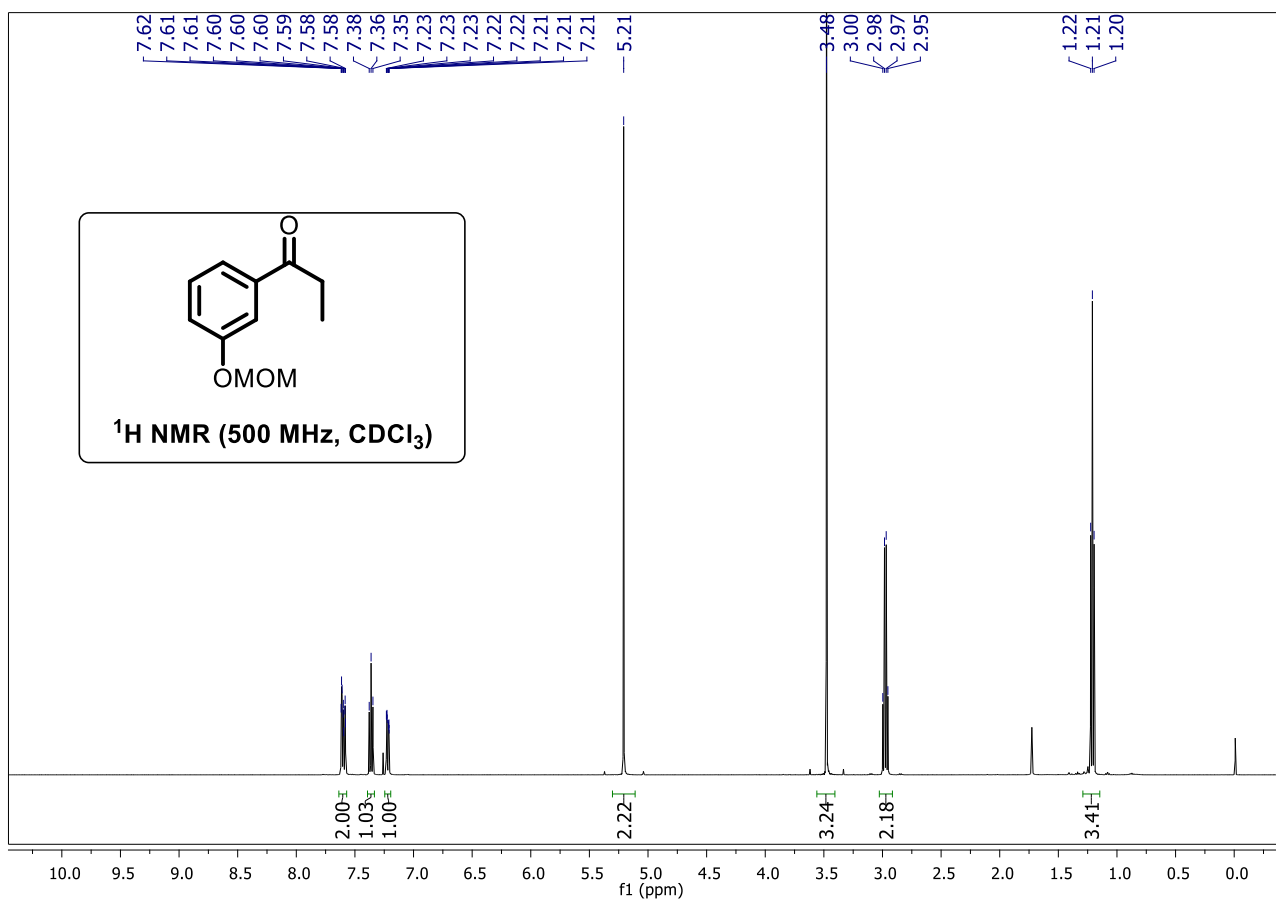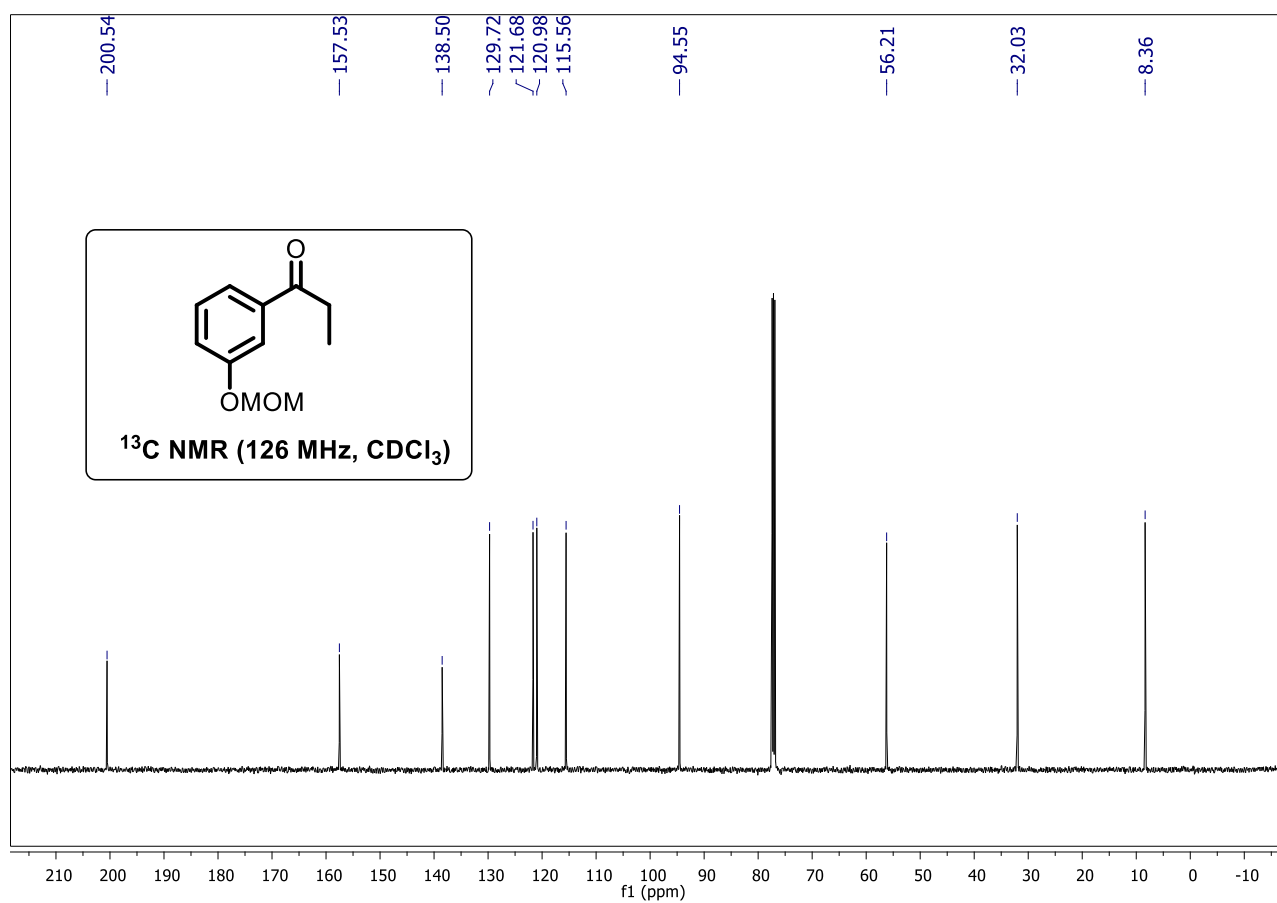

**(5*S*,8*R*)-5-((*tert*-Butyldimethylsilyl)oxy)-3-hydroxy-9-((4-methoxybenzyl)oxy)-2,8-dimethyl-1-phenylnonan-1-one (12): [See procedure](#)**

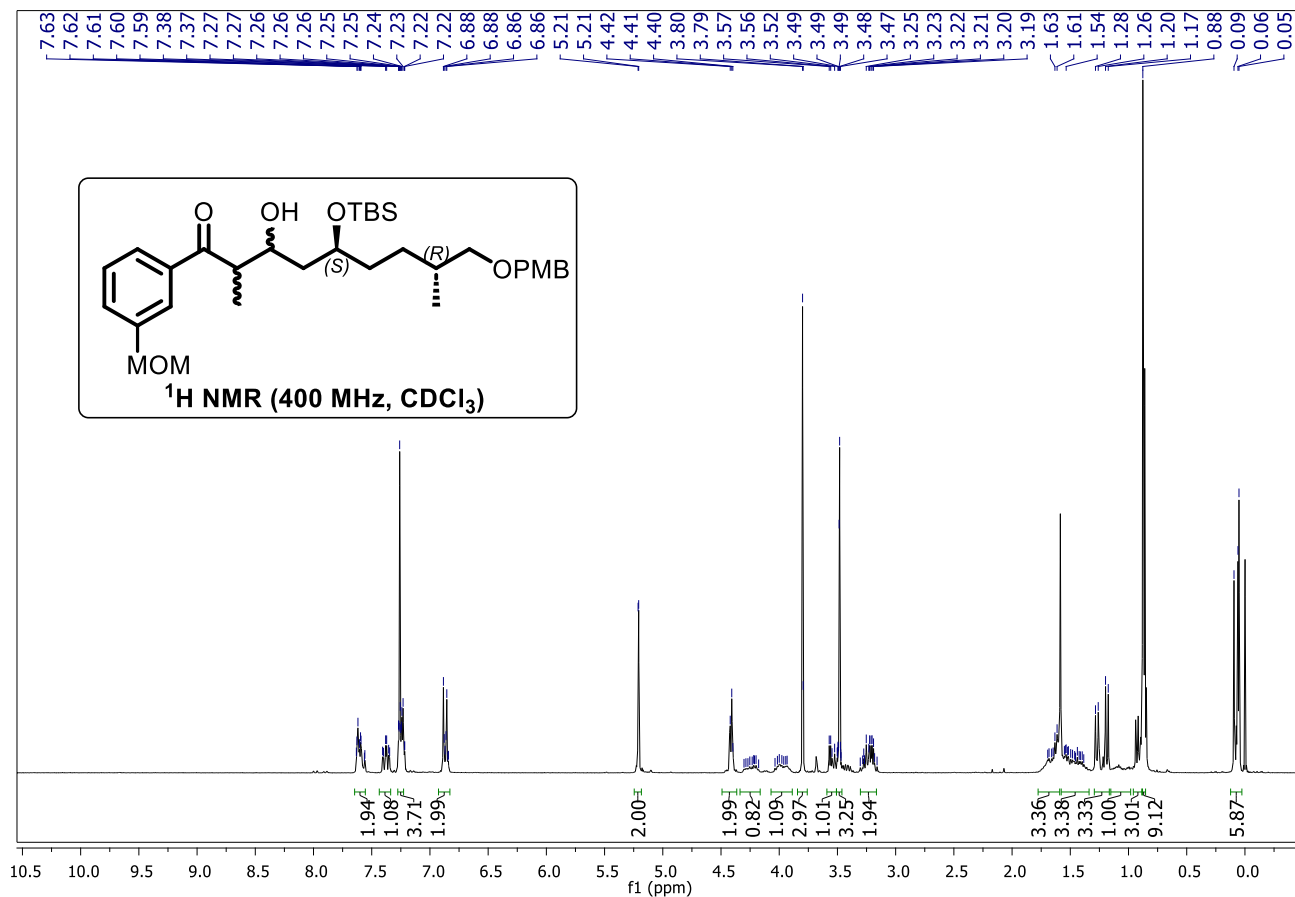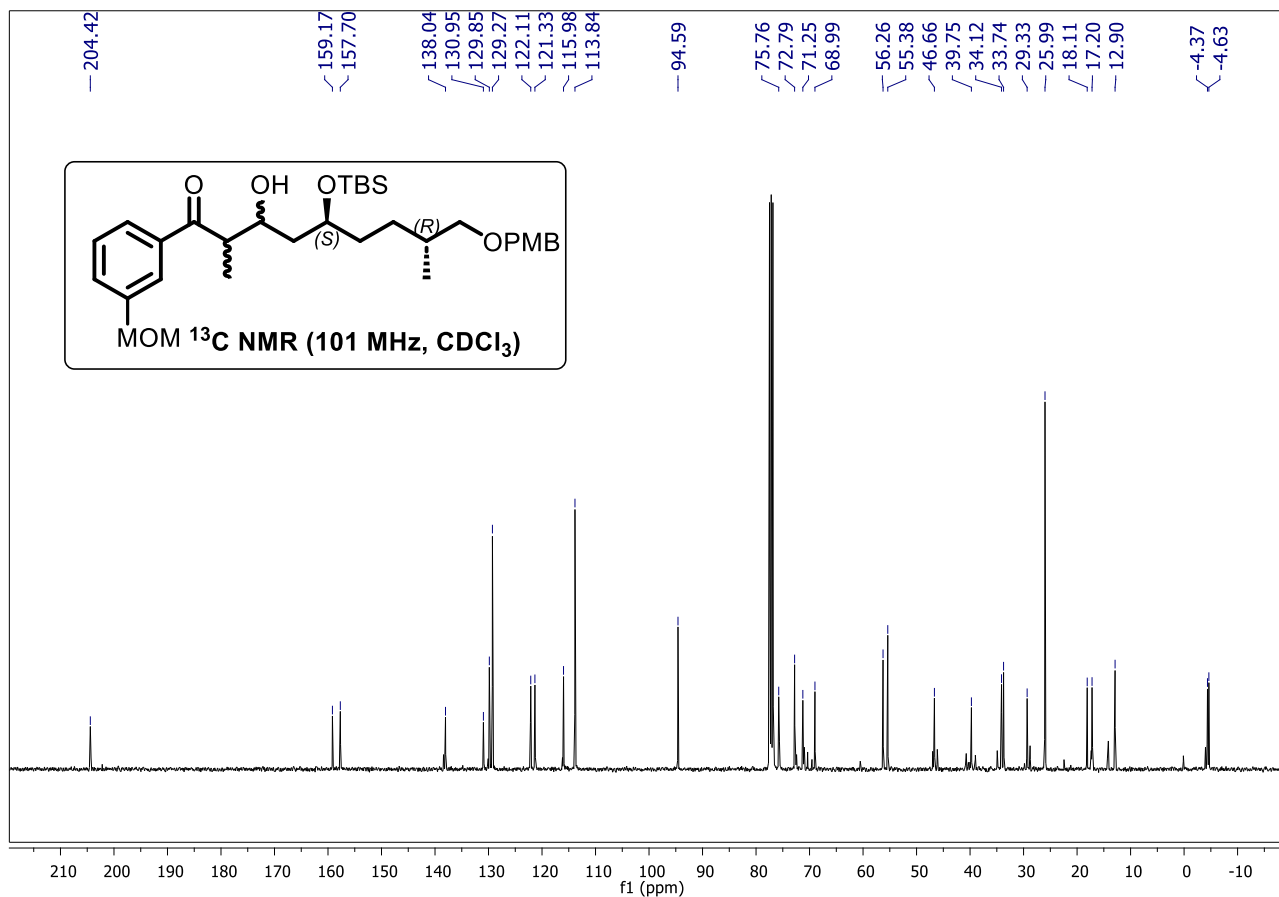

**(R)-4-Benzyl-3-((2R,3S,5S,8R)-5-((tert-butyl dimethylsilyl)oxy)-3-hydroxy-9-((4-methoxybenzyl)oxy)-2,8-dimethylnonanoyl)oxazolidin-2-one (15): [See procedure](#)**

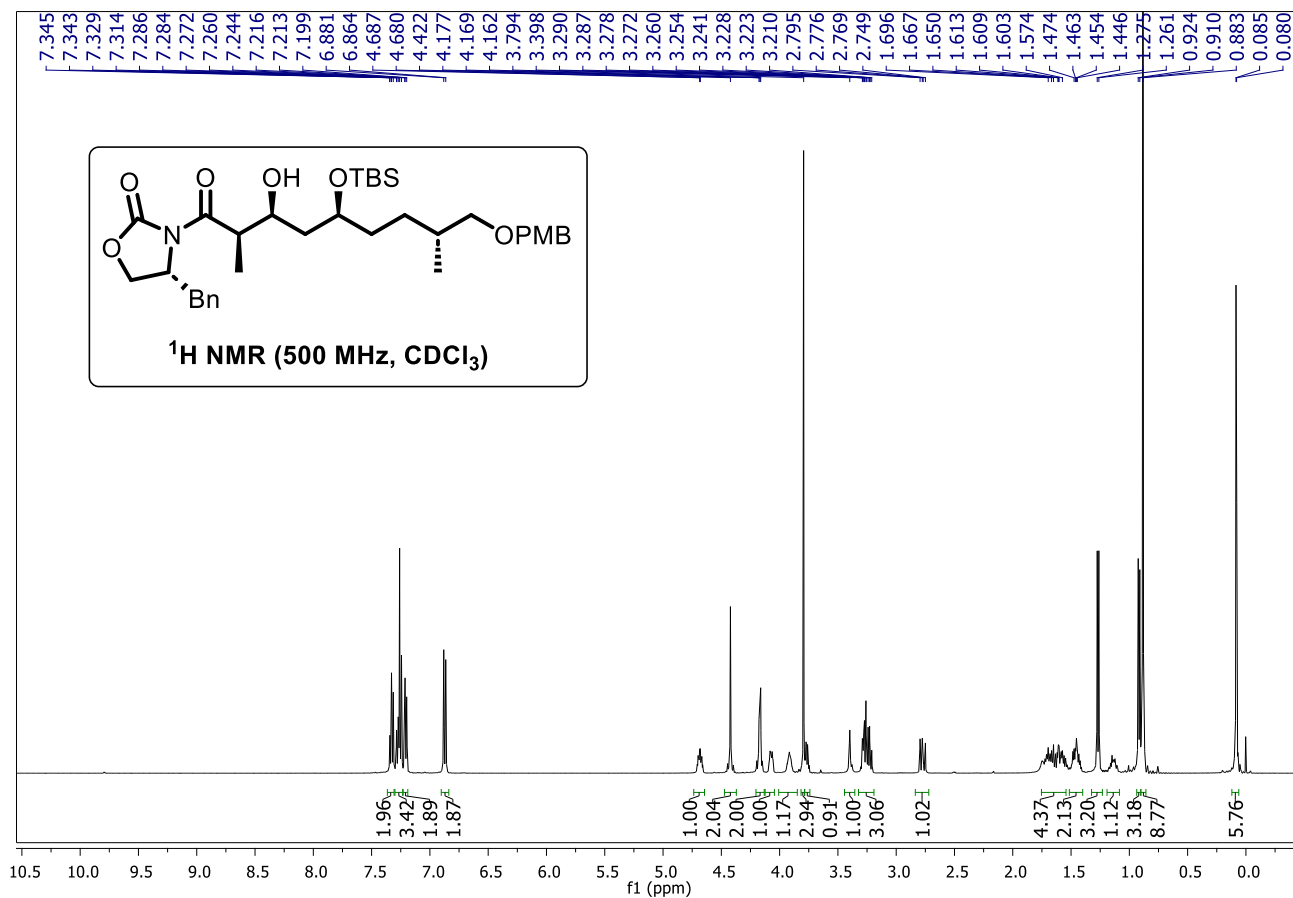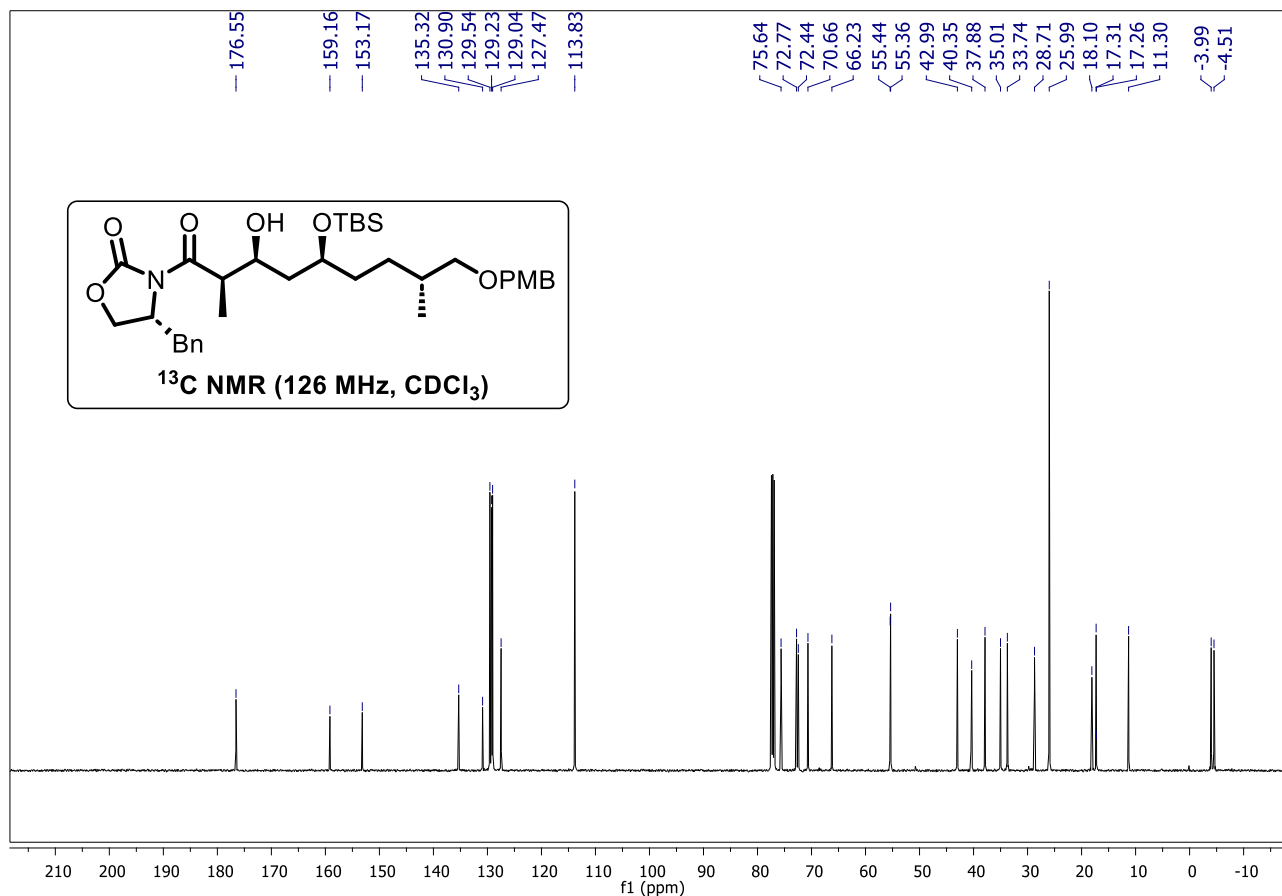

**(2*R*,3*S*,5*S*,8*R*)-5-((*tert*-Butyldimethylsilyl)oxy)-3-hydroxy-*N*-methoxy-9-((4-methoxybenzyl)oxy)-*N*,2,8-trimethylnonanamide (SI-7):** [See procedure](#)

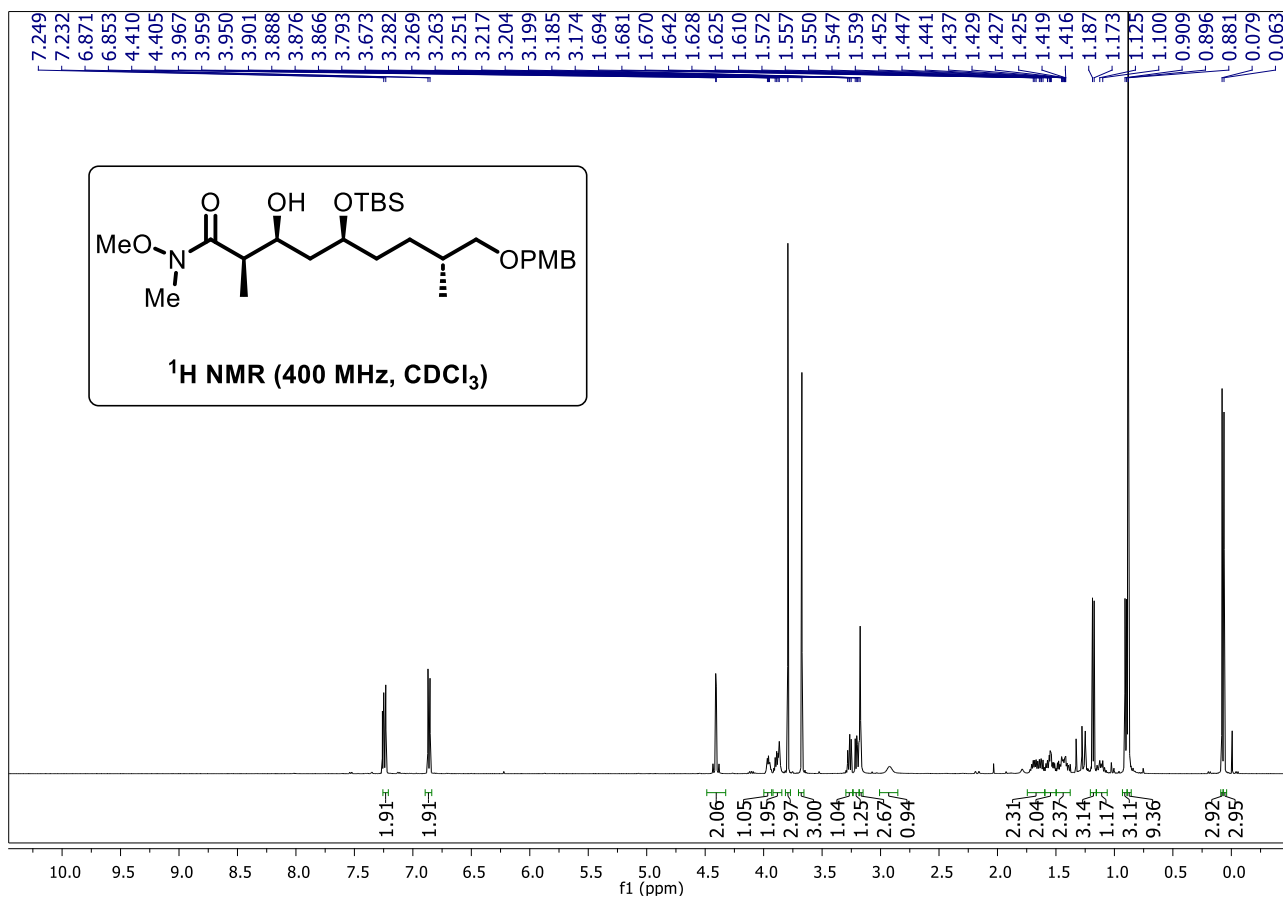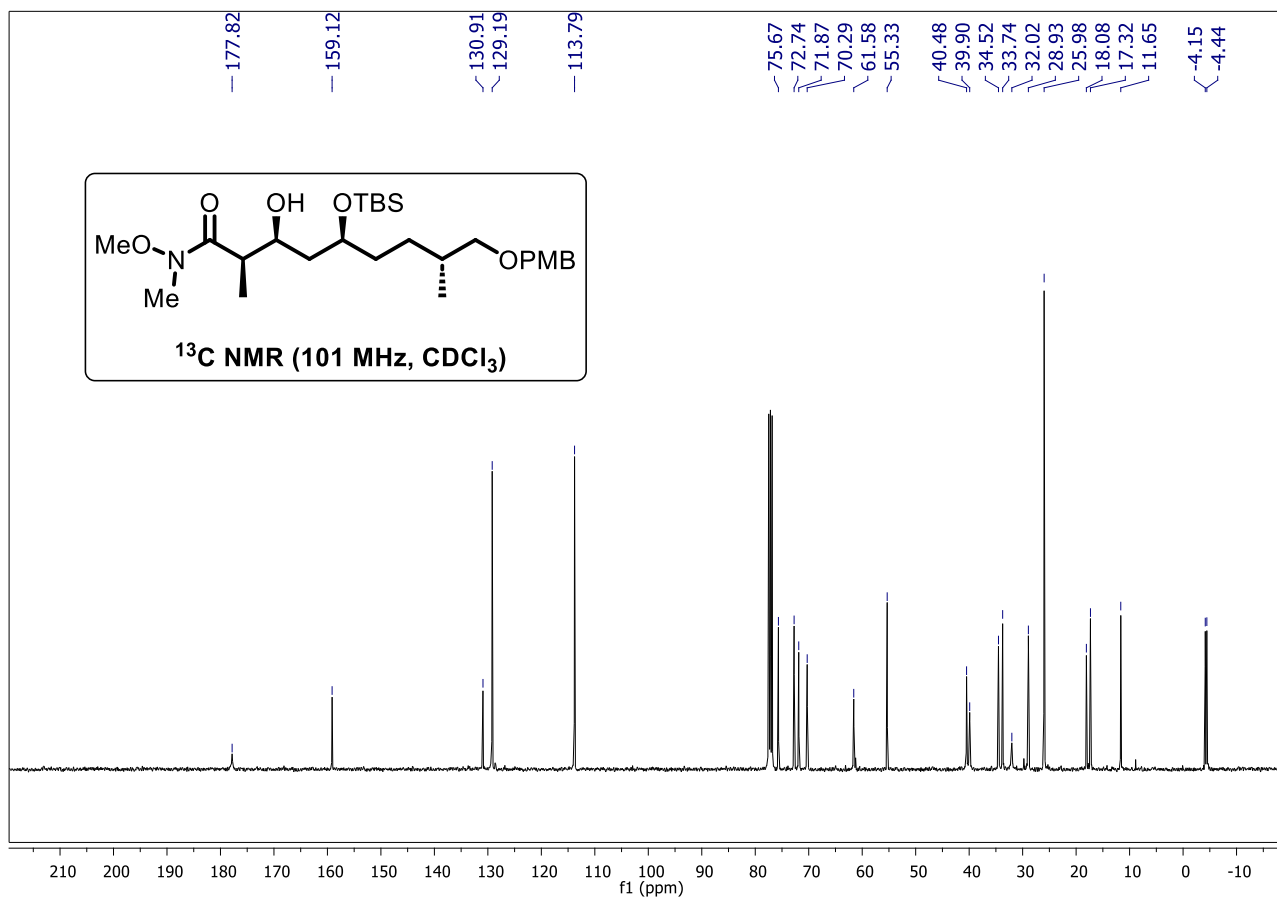

**(2*R*,3*S*,5*S*,8*R*)-5-((*tert*-Butyldimethylsilyloxy)-*N*-methoxy-9-((4-methoxybenzyl)oxy)-*N*,2,8-trimethyl-3-((triethylsilyloxy)nonanamide) (16): [See procedure](#)**

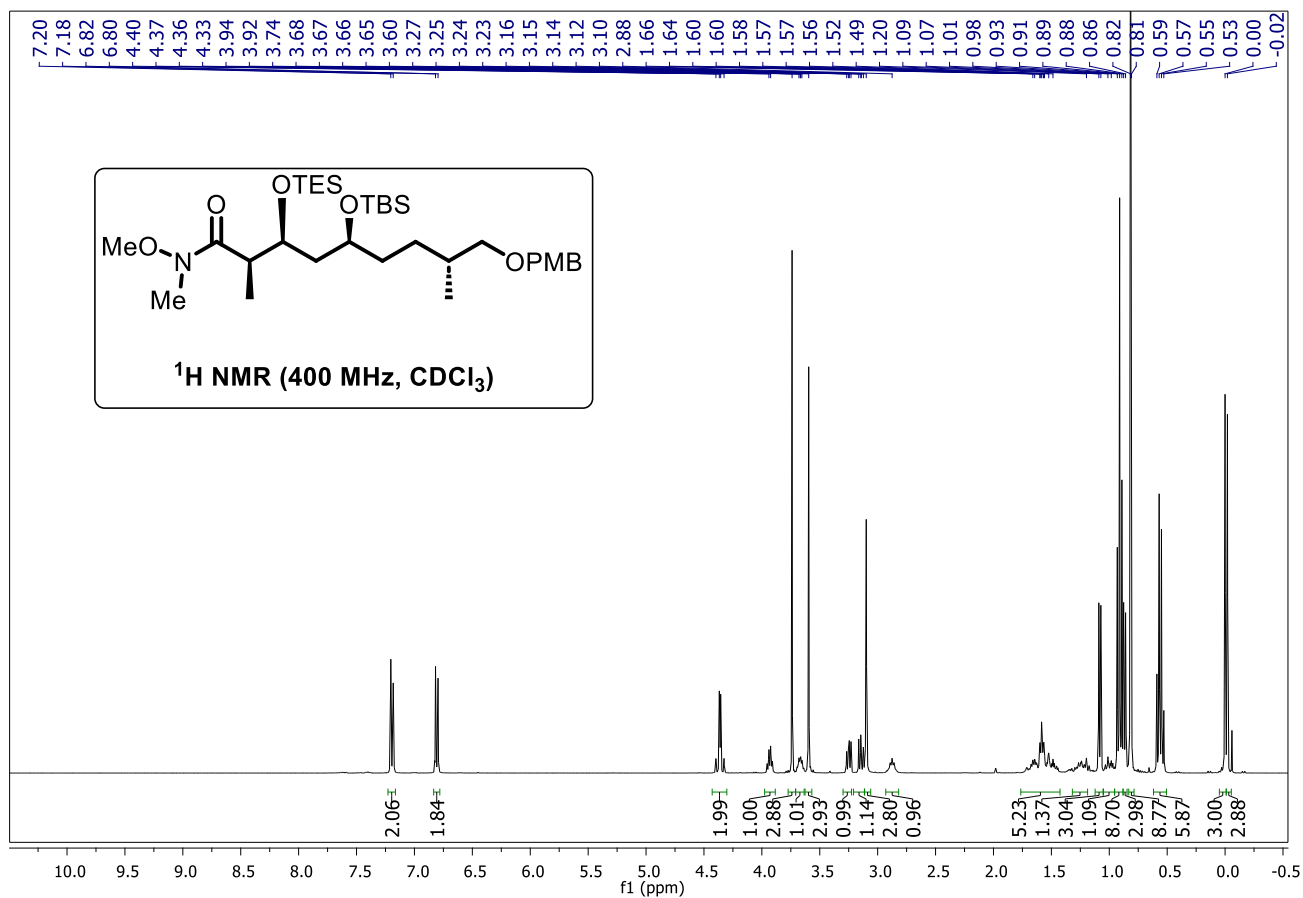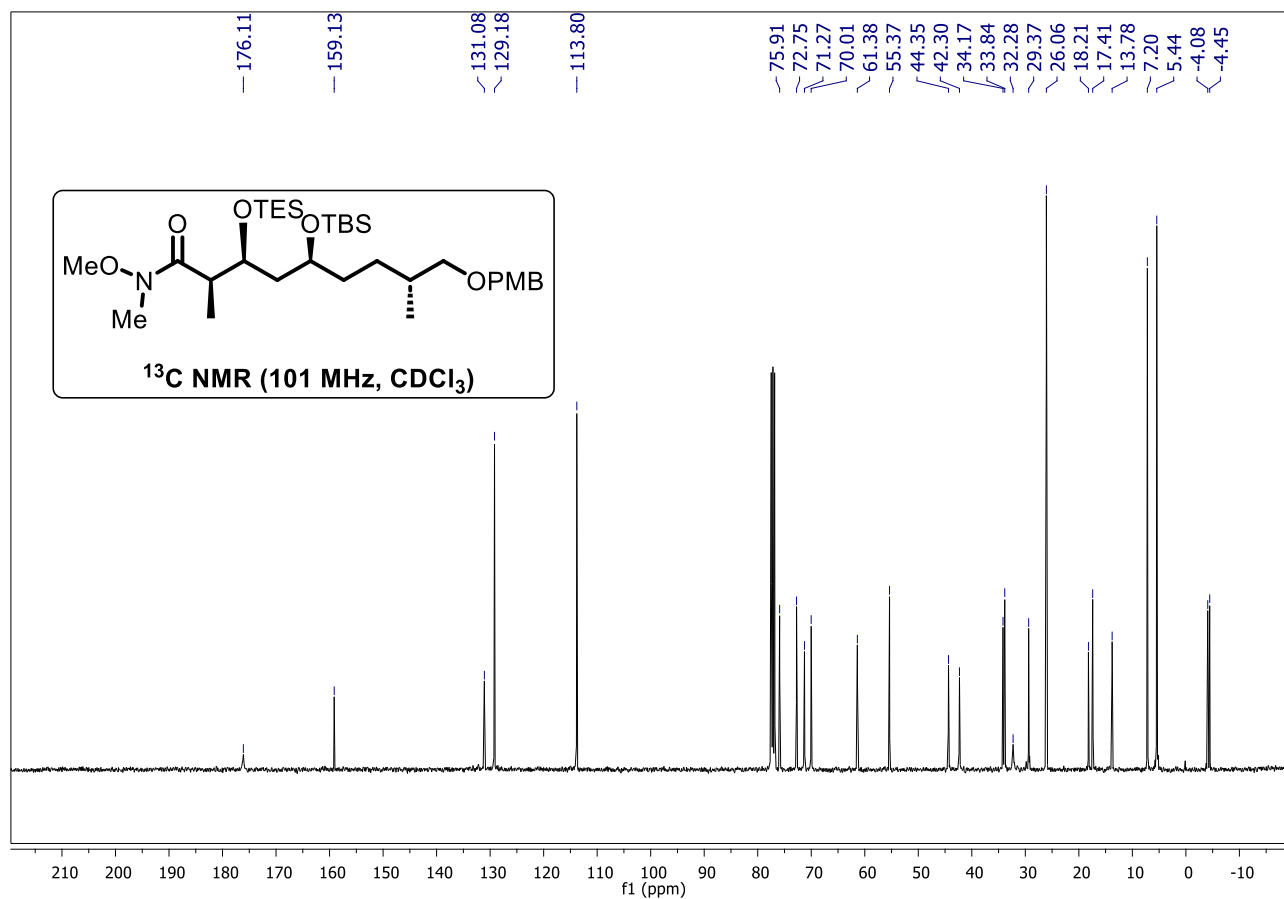

(2*R*,3*S*,5*S*,8*R*)-5-((*tert*-Butyldimethylsilyl)oxy)-9-((4-methoxybenzyl)oxy)-1-(3-methoxyphenyl)-2,8-dimethyl-3-((triethylsilyl)oxy)nonan-1-one (17): [See procedure](#)

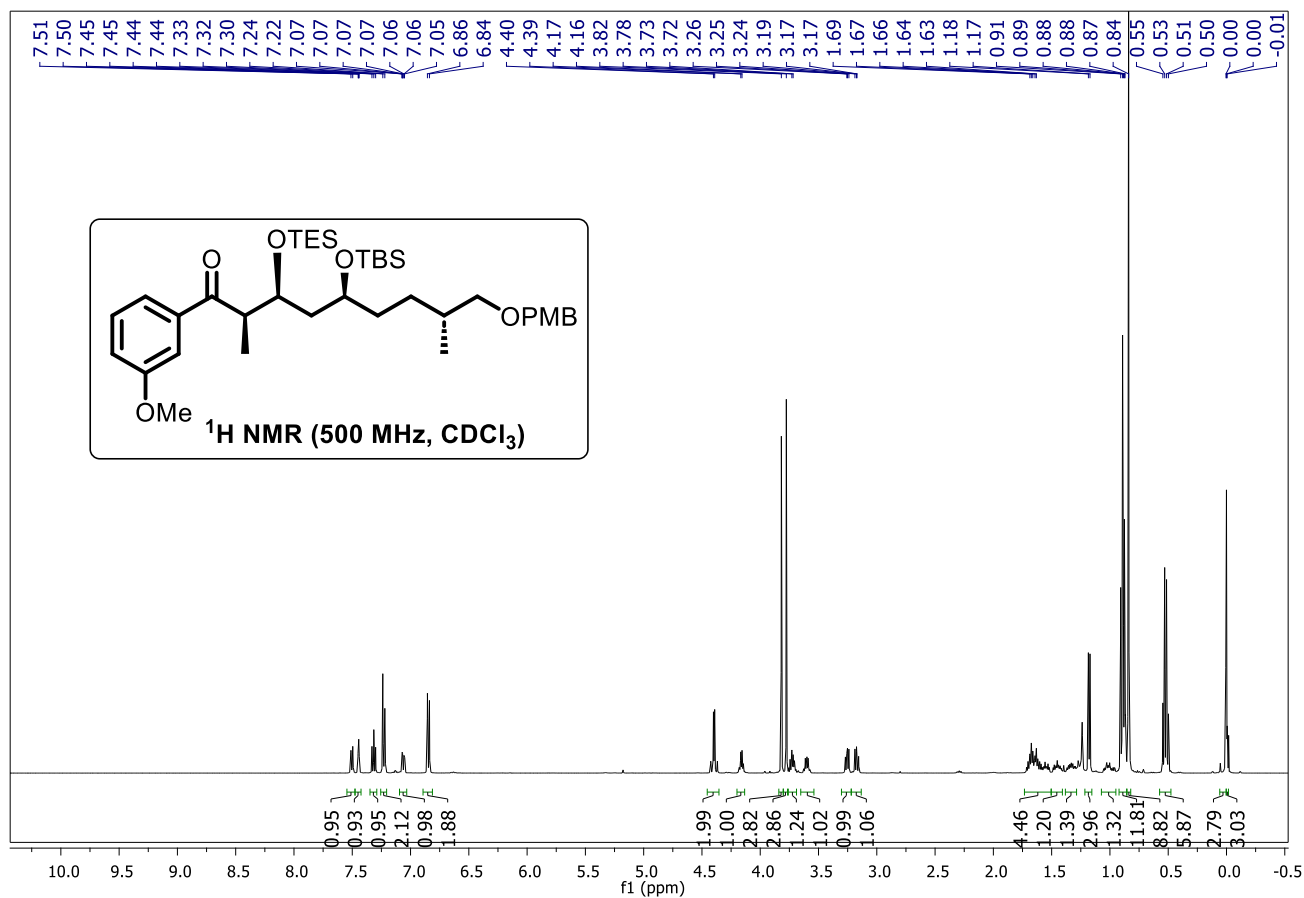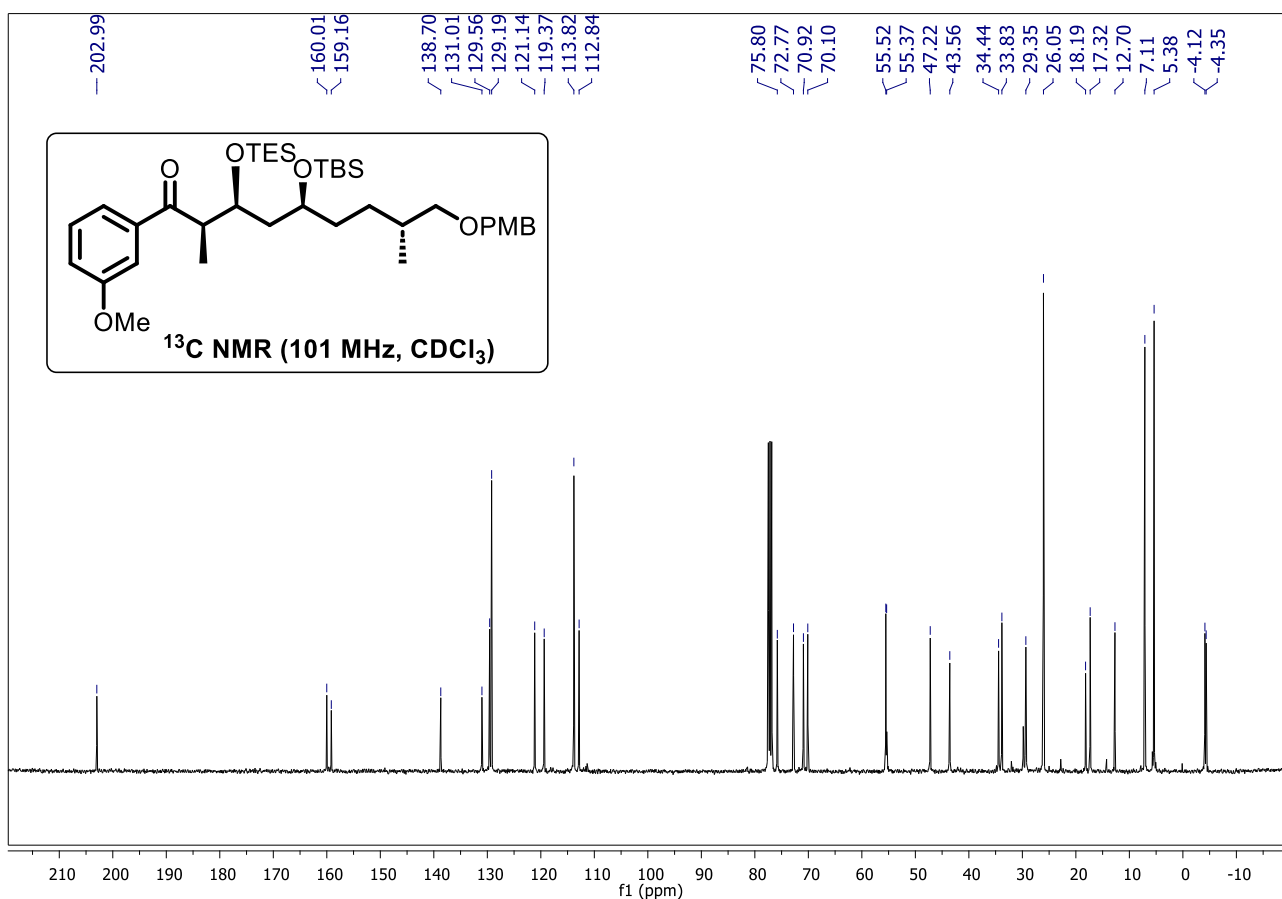

**(1*R*,2*S*,3*S*,5*S*,8*R*)-5-((*tert*-Butyldimethylsilyl)oxy)-9-((4-methoxybenzyl)oxy)-1-(3-methoxyphenyl)-2,8-dimethyl-3-((triethylsilyl)oxy)nonan-1-ol (SI-8): [See procedure](#)**

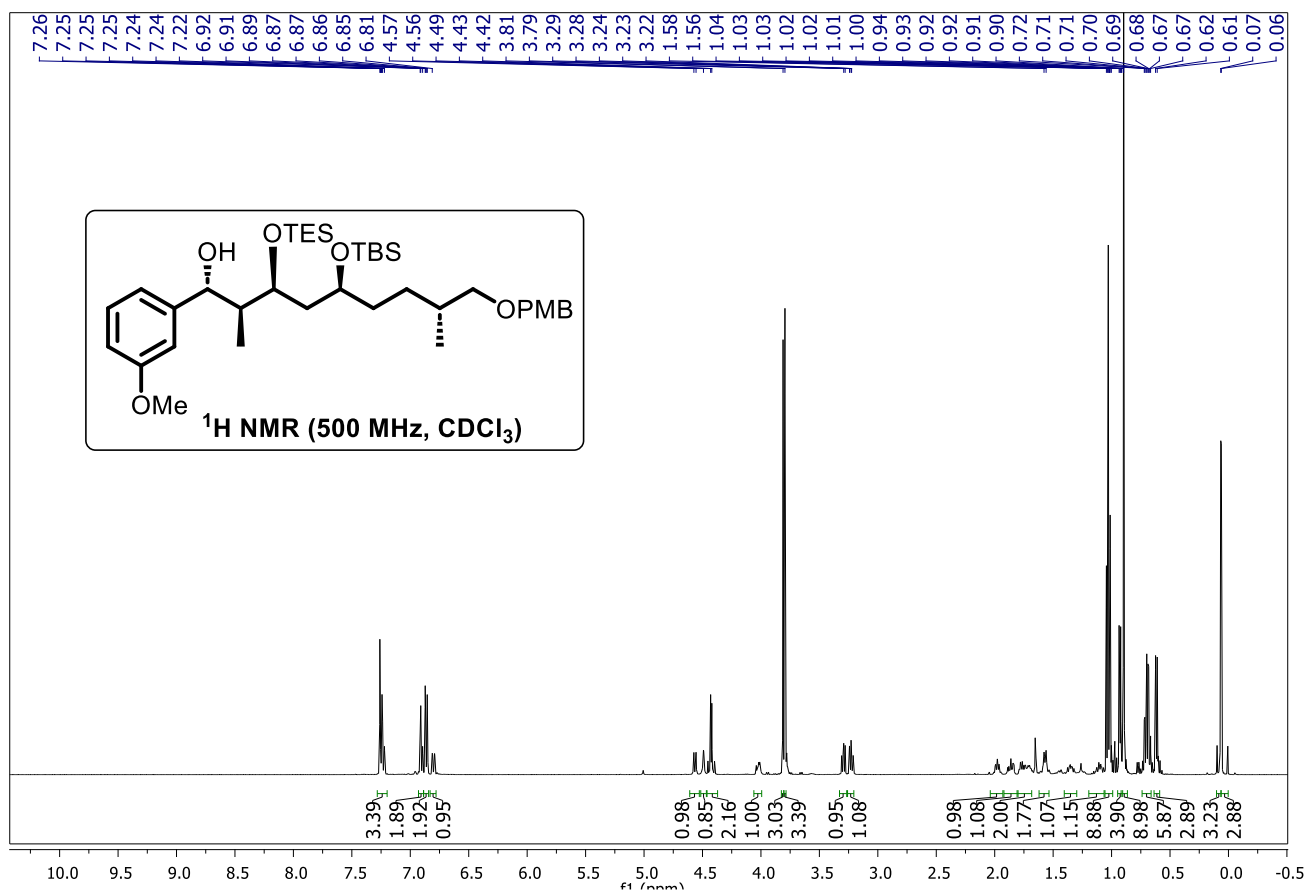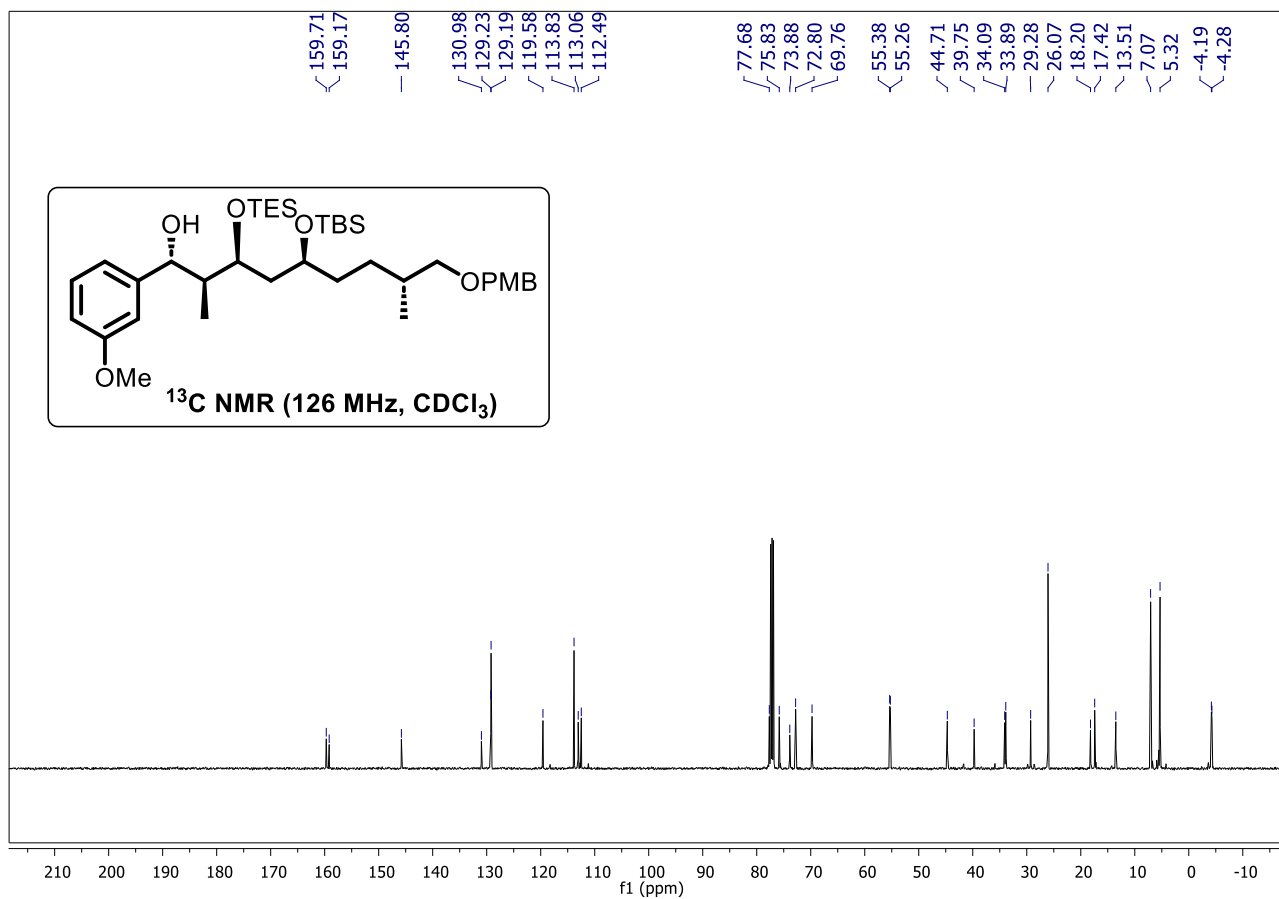

***tert*-Butyl(((2*S*,5*R*)-6-((4-methoxybenzyl)oxy)-1-((4*S*,5*R*,6*R*)-6-(3-methoxyphenyl)-2,2,5-trimethyl-1,3-dioxan-4-yl)-5-methylhexan-2-yl)oxy)dimethylsilane (20): [See procedure](#)**

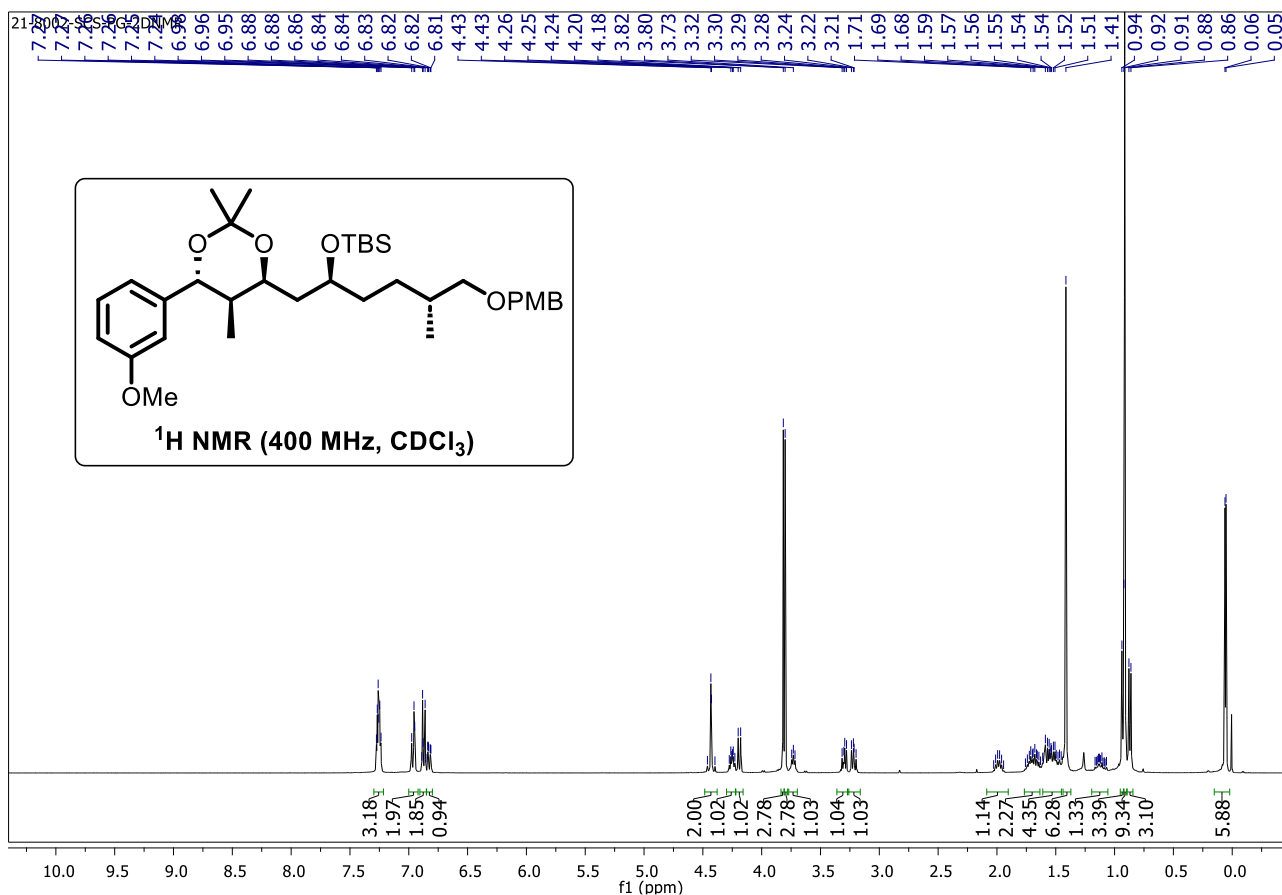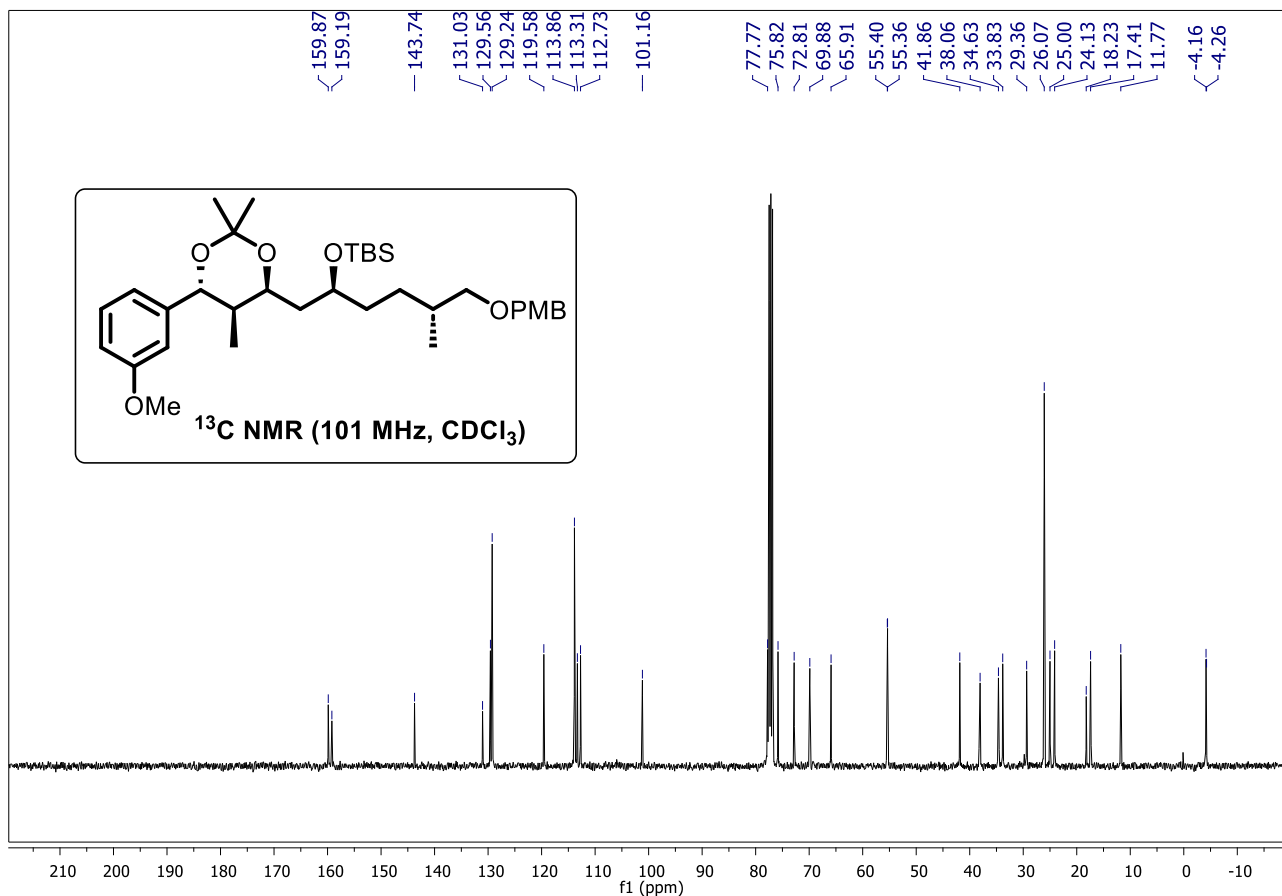



**(5*R*,6*R*,7*S*,9*S*)-7-((*tert*-Butyldimethylsilyl)oxy)-9-((*R*)-4-(4-methoxybenzyl)oxy)-3-methylbutyl)-5-(3-methoxyphenyl)-2,2,3,3,6,11,11,12,12-nonamethyl-4,10-dioxo-3,11-disilatridecane (SI-9): [See procedure](#)**

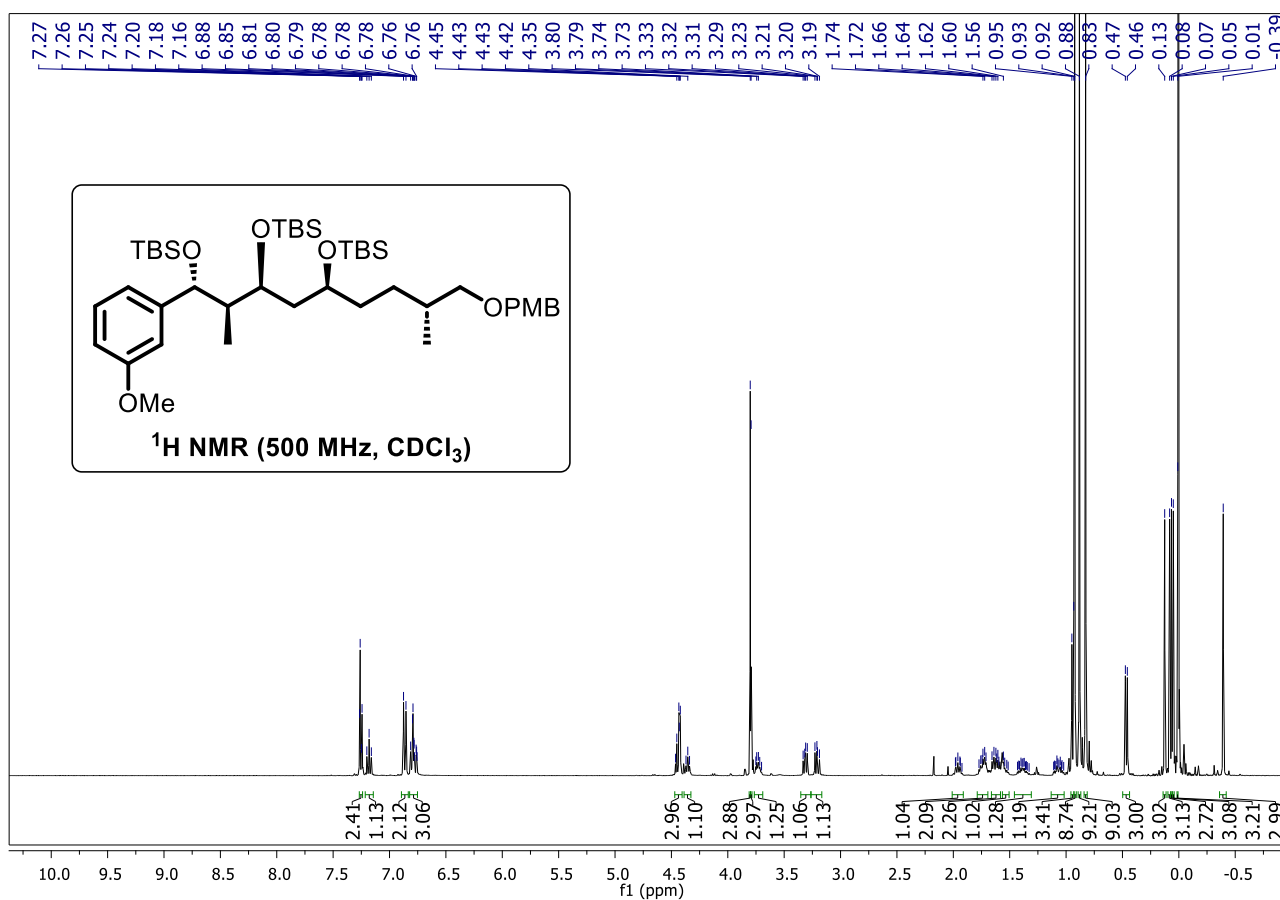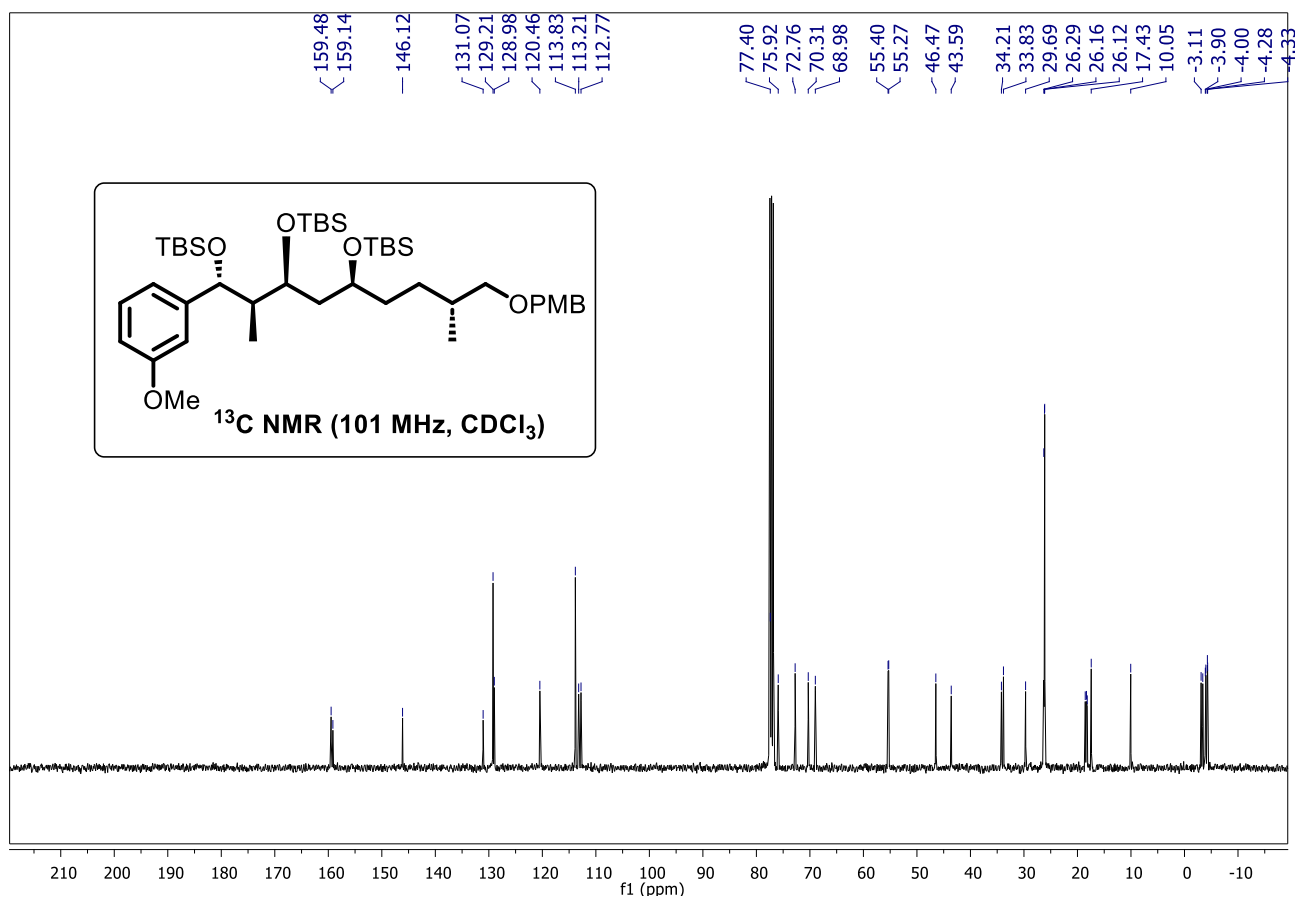

**(2*R*,5*S*,7*S*,8*R*,9*R*)-5,7,9-tris((*tert*-Butyldimethylsilyl)oxy)-9-(3-methoxyphenyl)-2,8-dimethylnonan-1-ol (SI-10):** [See procedure](#)

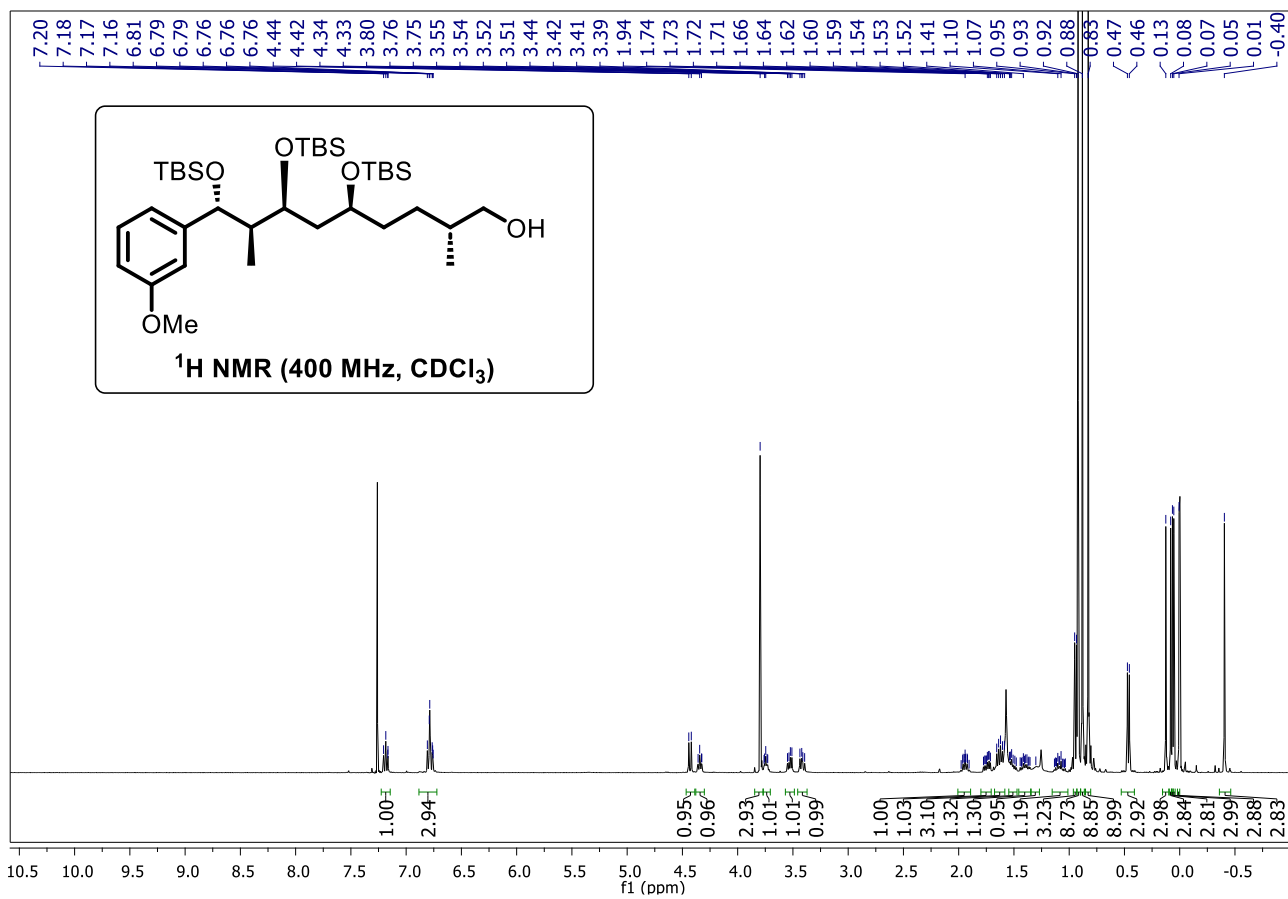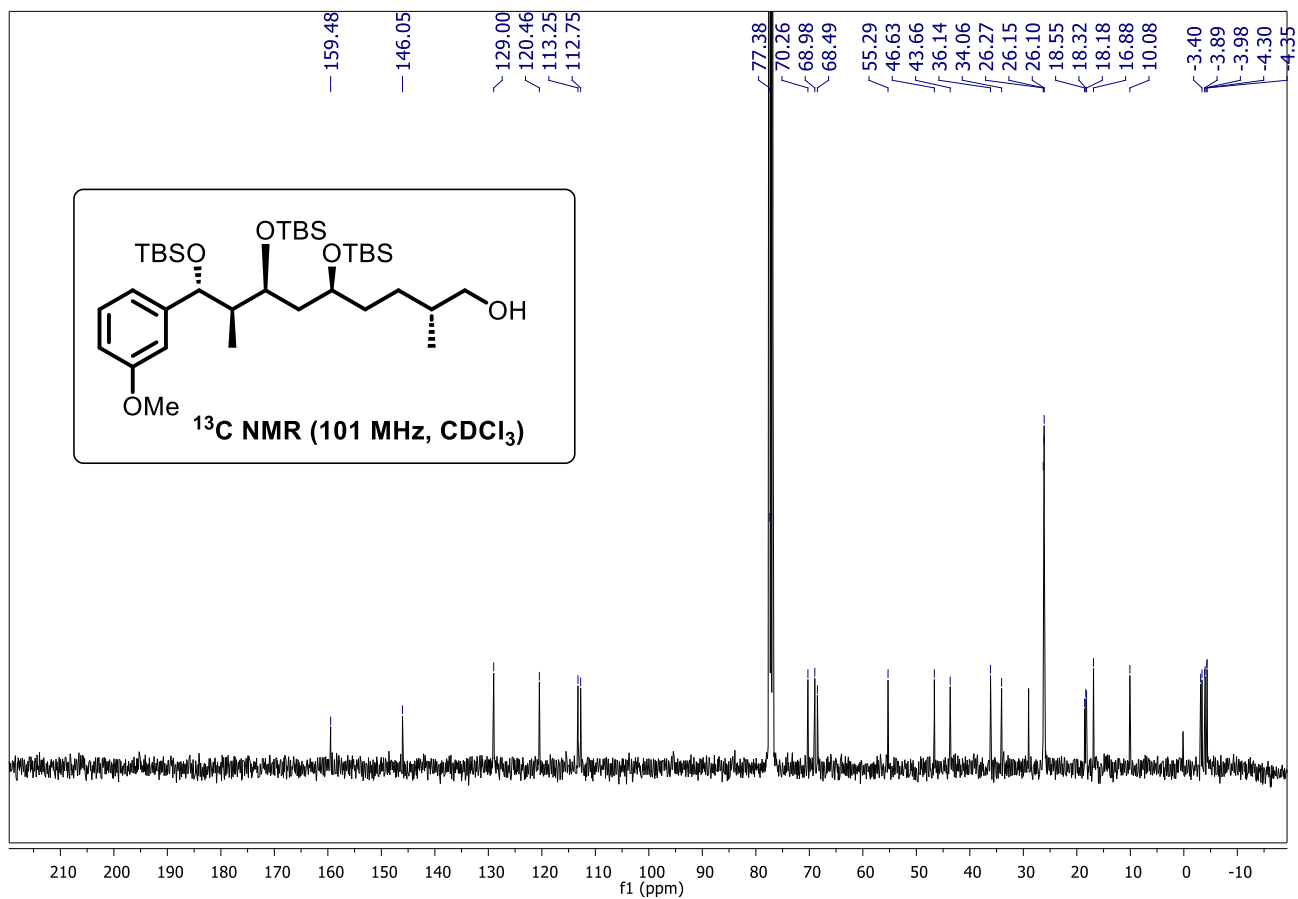

**(2*R*,5*S*,7*S*,8*R*,9*R*)-5,7,9-tris(*tert*-butyldimethylsilyloxy)-9-(3-methoxyphenyl)-2,8-dimethylnonanal [(+)-19]: [See procedure](#)**

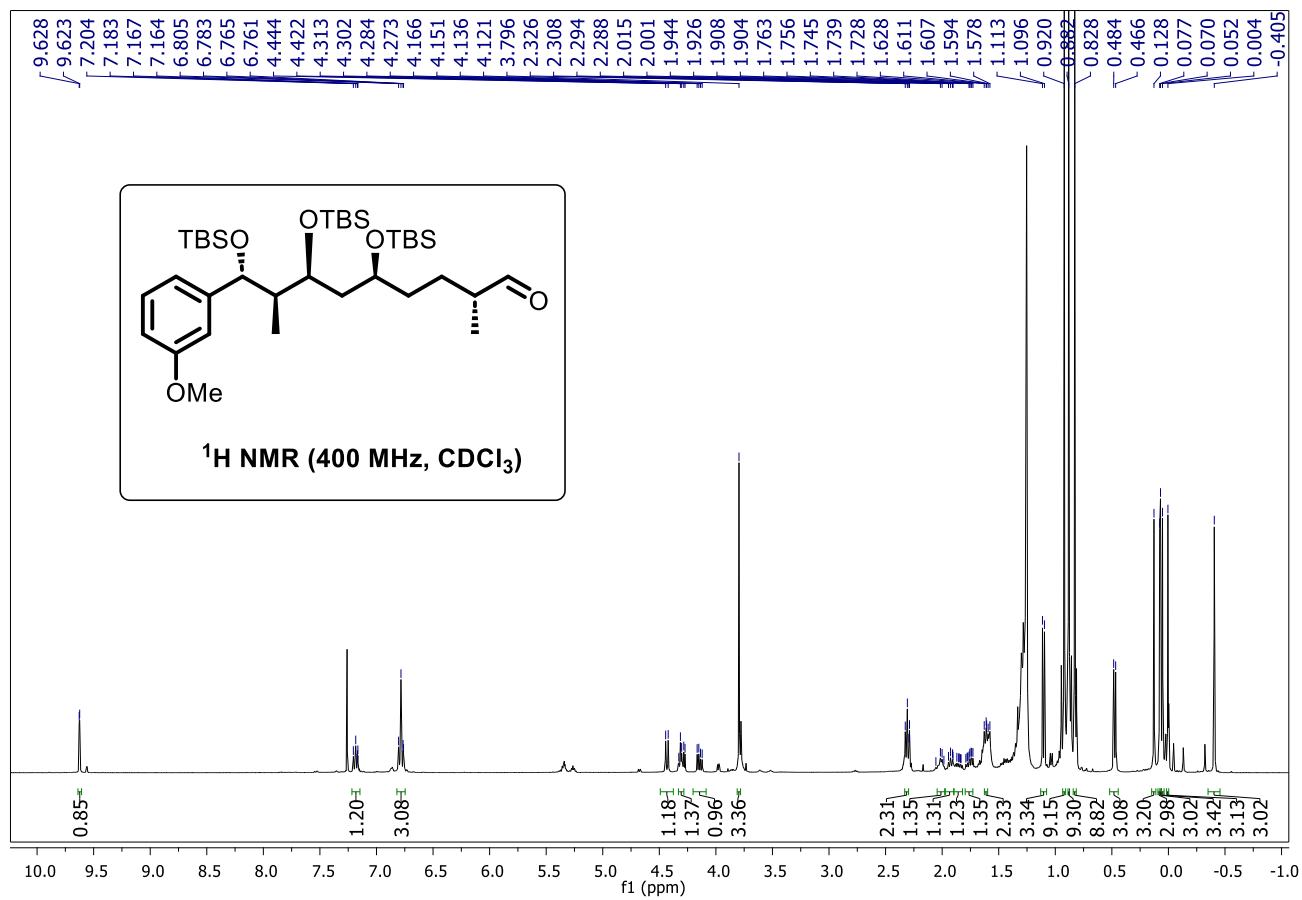

Ethyl (*E*)-4-((*tert*-butyldimethylsilyl)oxy)-2-methylbut-2-enoate (**22**): [See procedure](#)

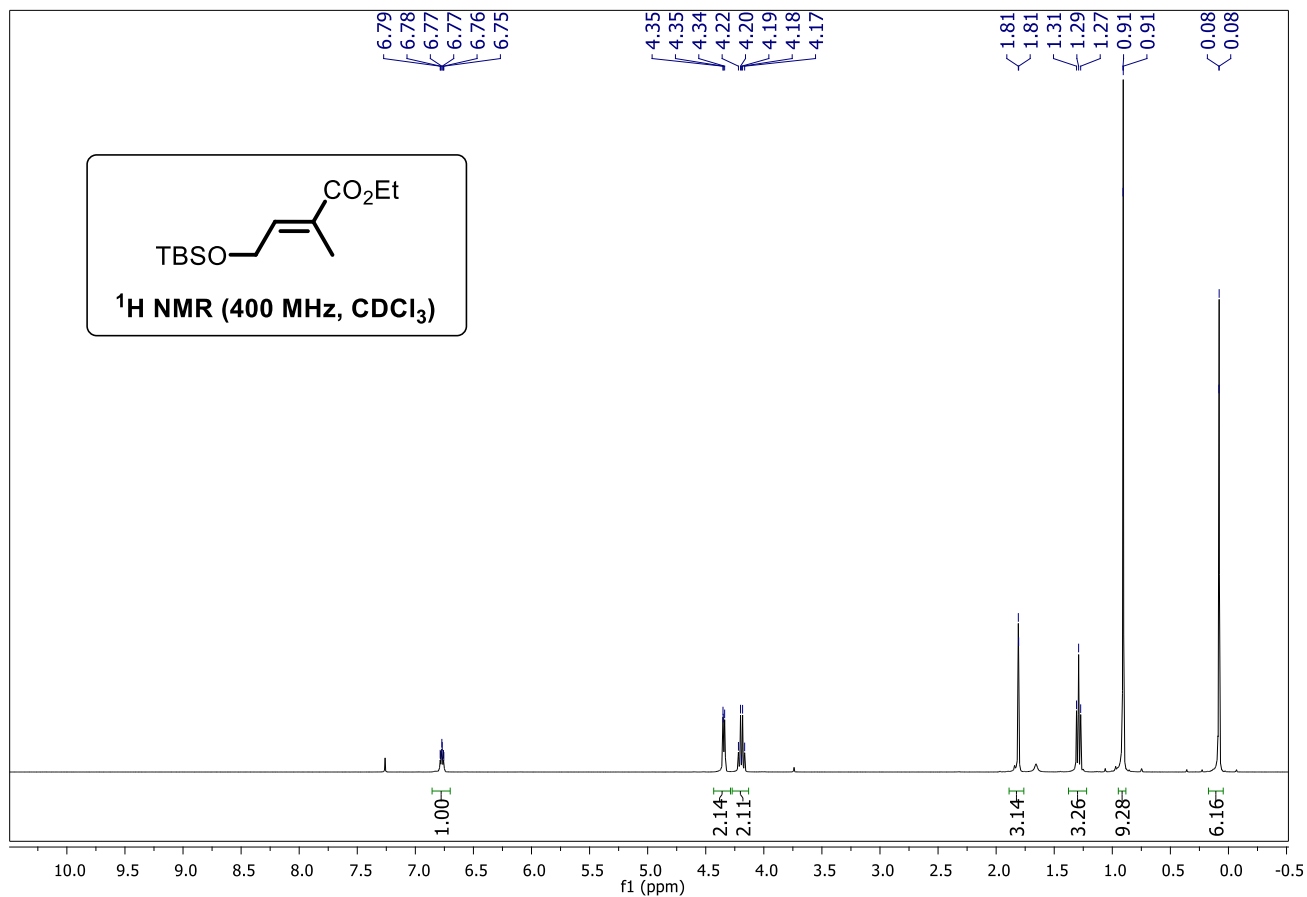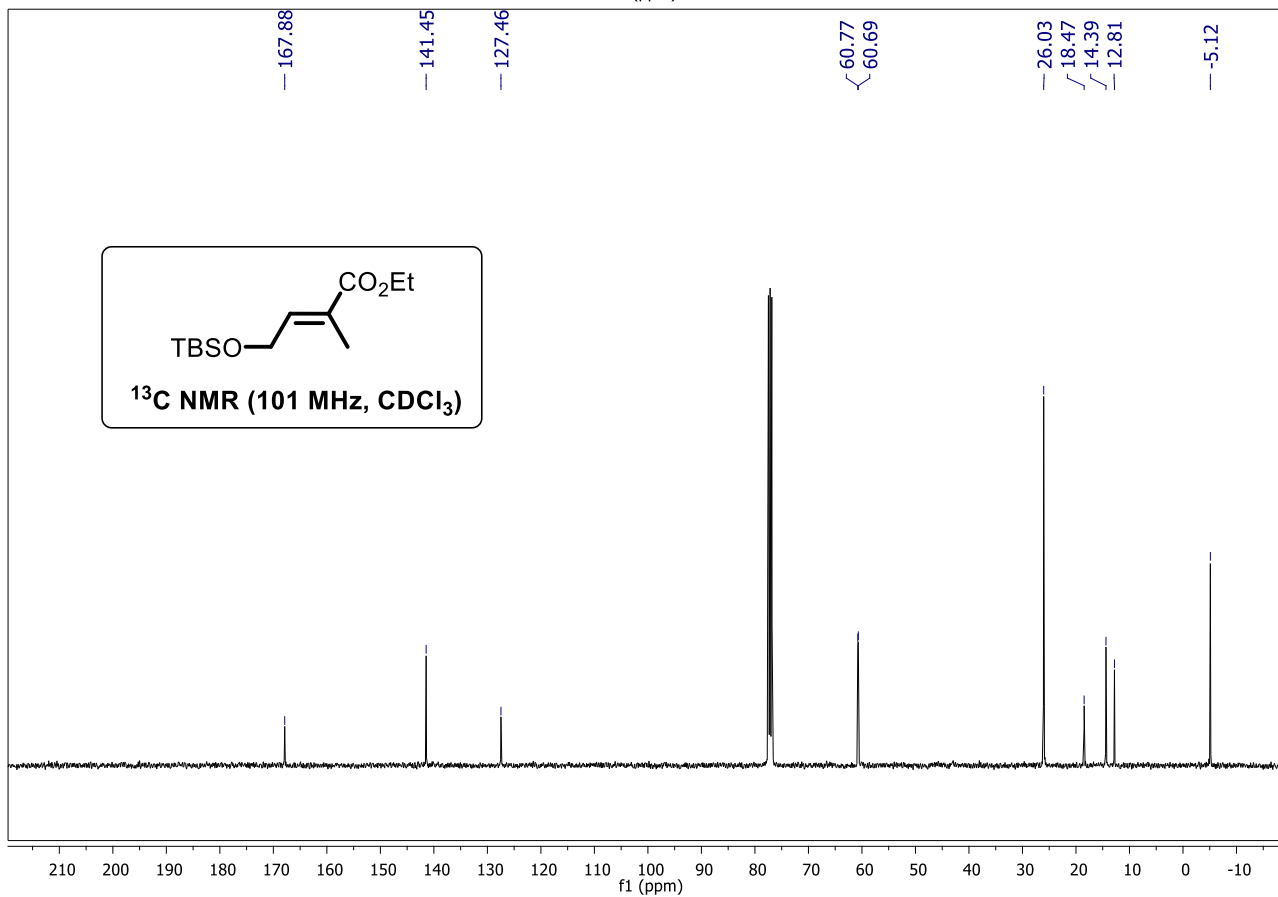

**(E)-4-((tert-butyldimethylsilyl)oxy)-2-methylbut-2-en-1-ol (SI-11):** [See procedure](#)

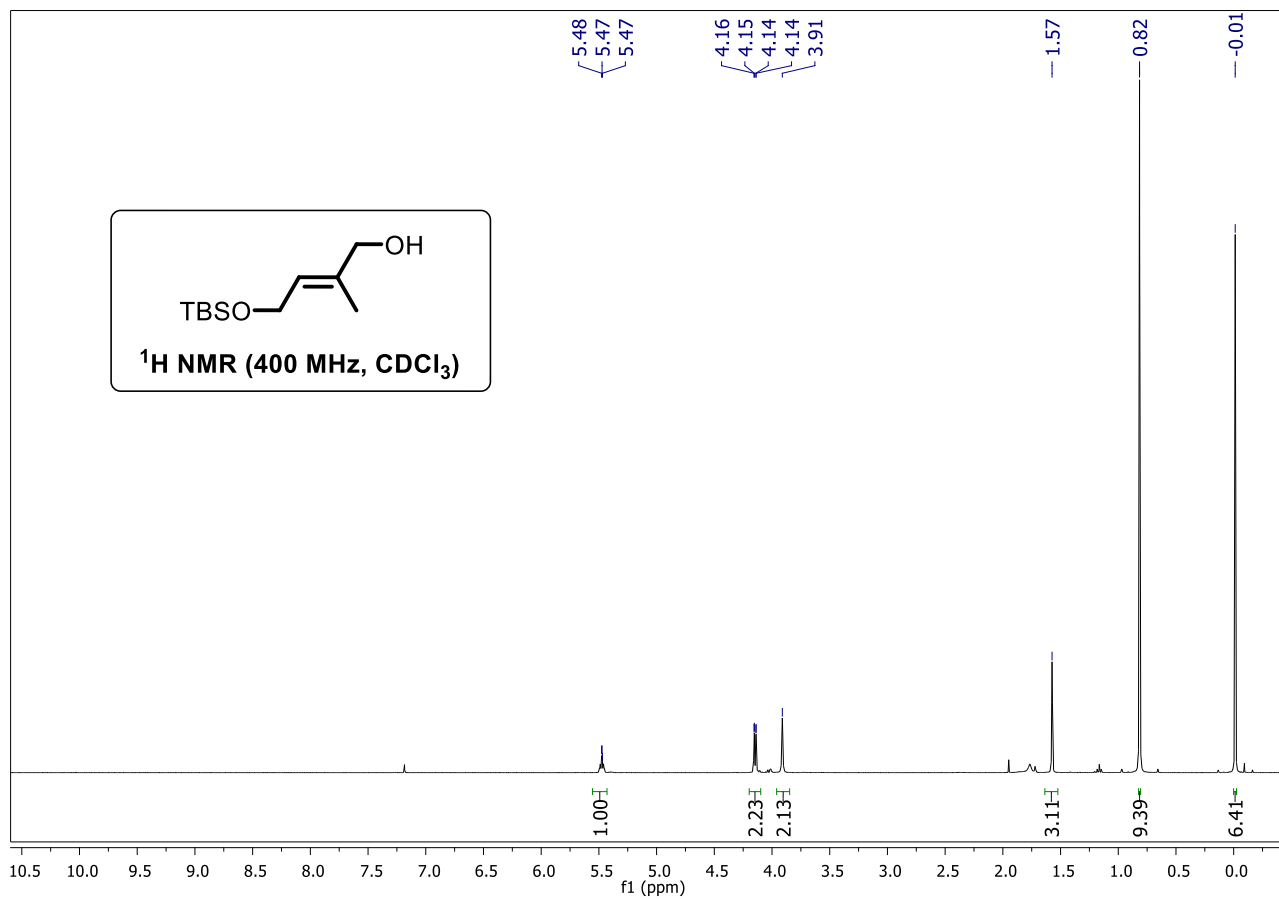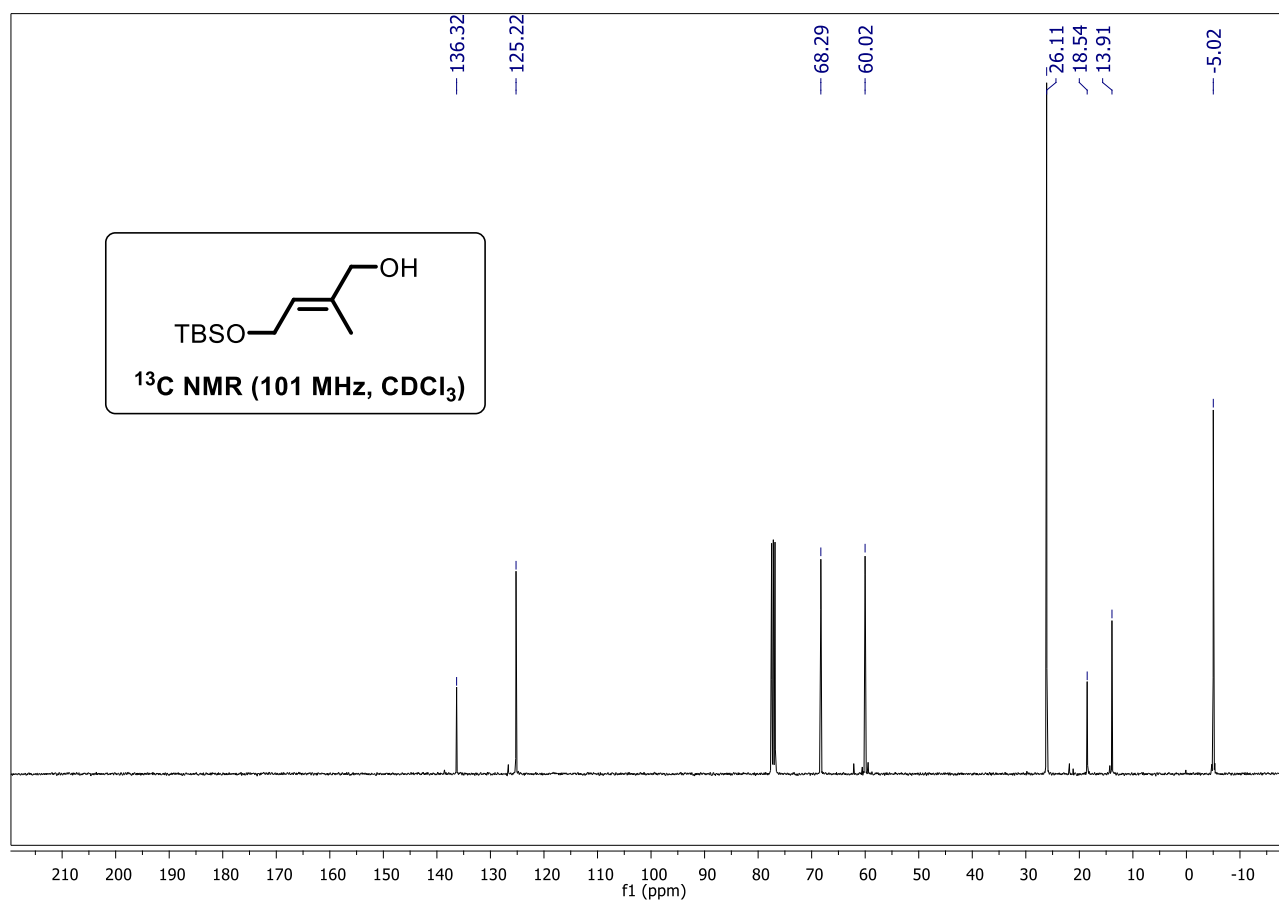

(E)-4-((tert-Butyldimethylsilyl)oxy)-2-methylbut-2-enal (**23**): [See procedure](#)

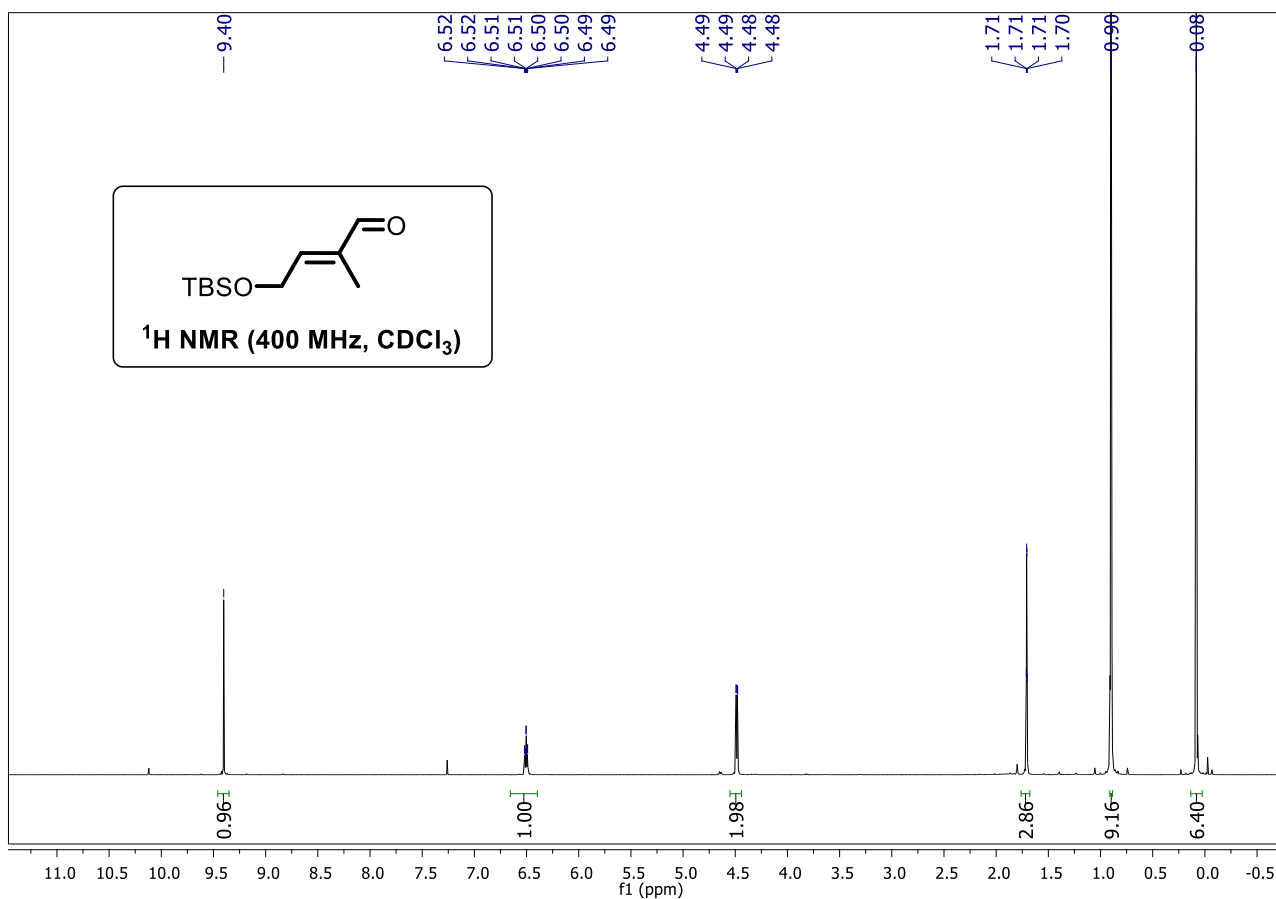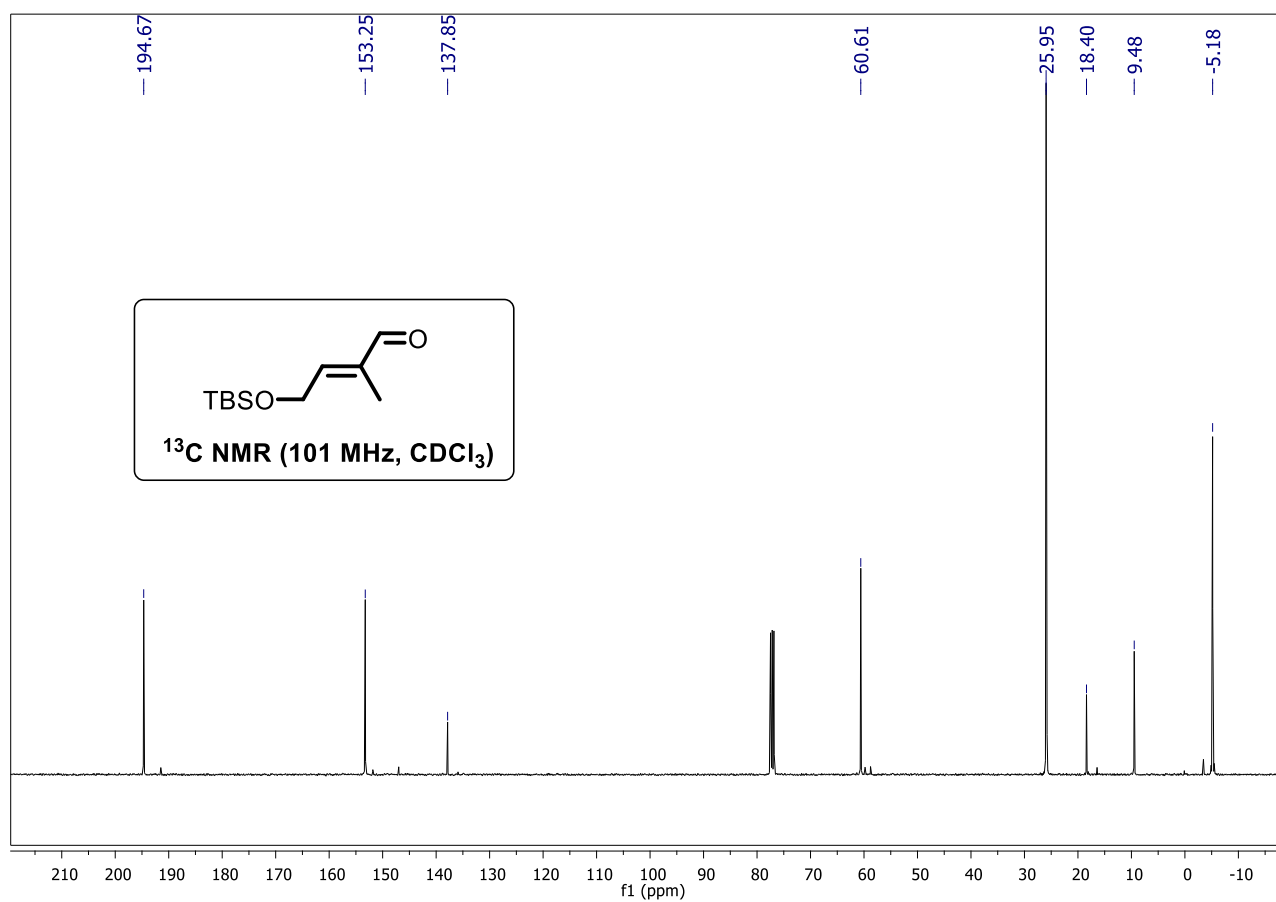

**(*R,E*)-7-((*tert*-Butyldimethylsilyl)oxy)-5-methylhepta-1,5-dien-4-ol (24):** [See procedure](#)

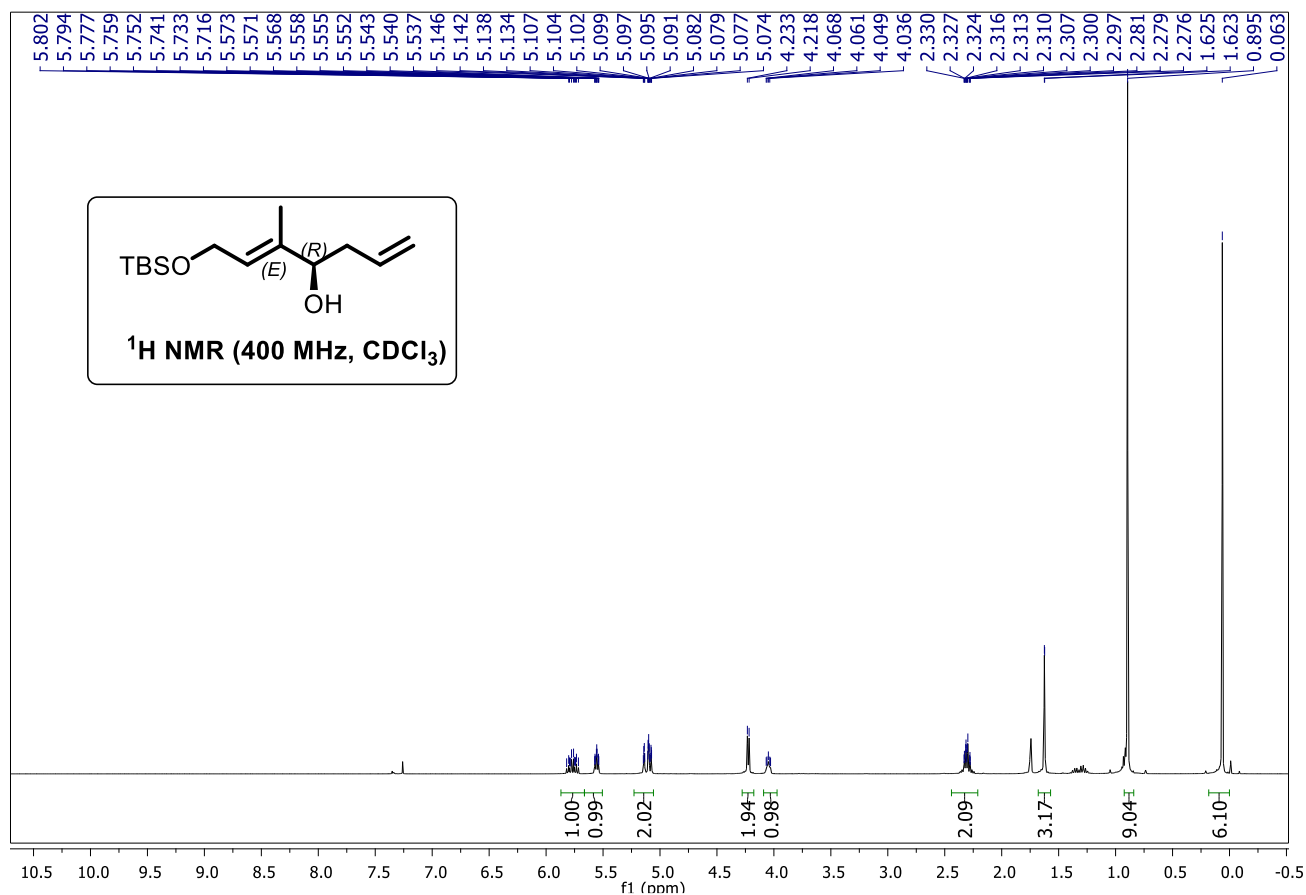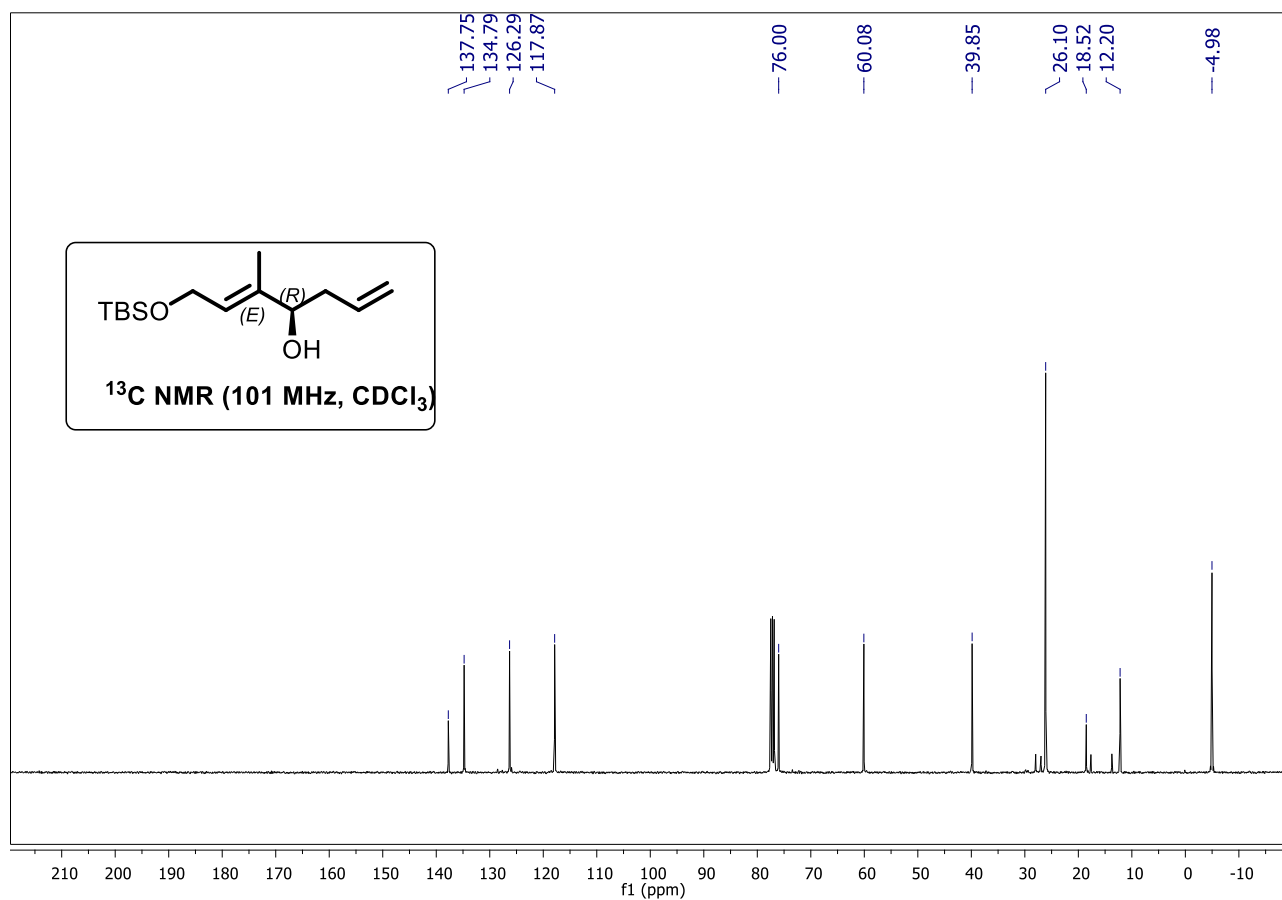

**(*R,E*)-7-((*tert*-Butyldimethylsilyl)oxy)-5-methylhepta-1,5-dien-4-yl (*R*)-3,3,3-trifluoro-2-methoxy-2-phenylpropanoate (SI-12): [See procedure](#)**

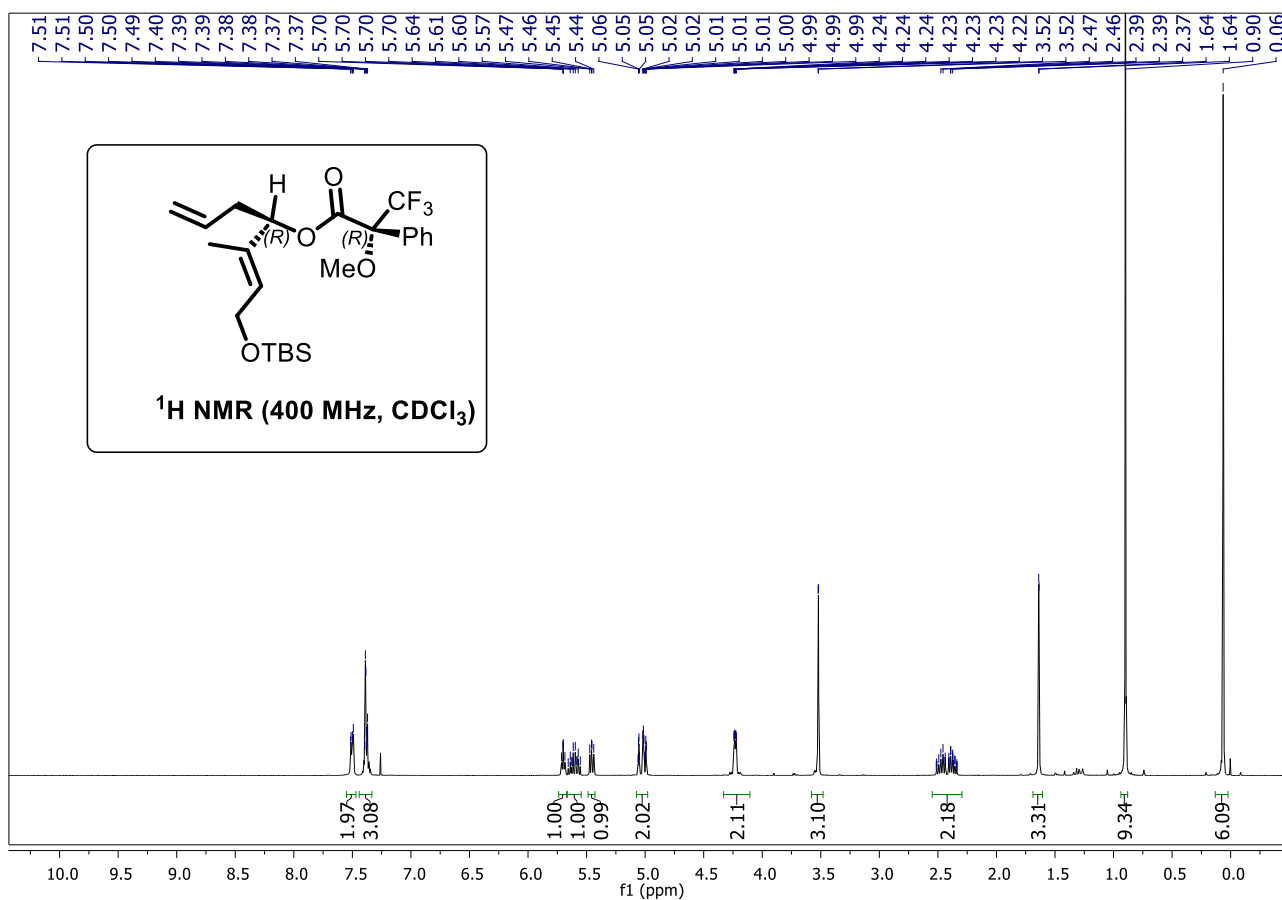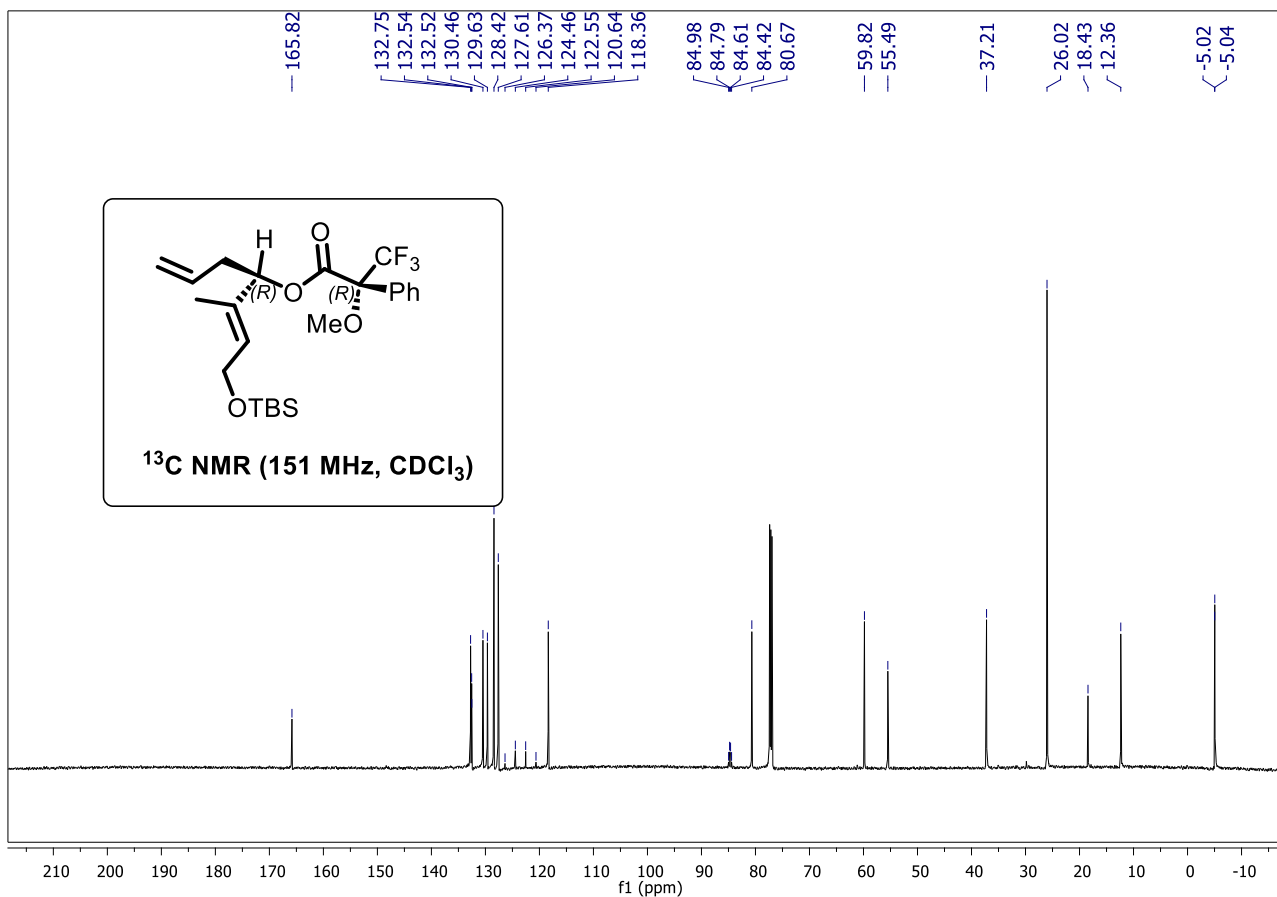



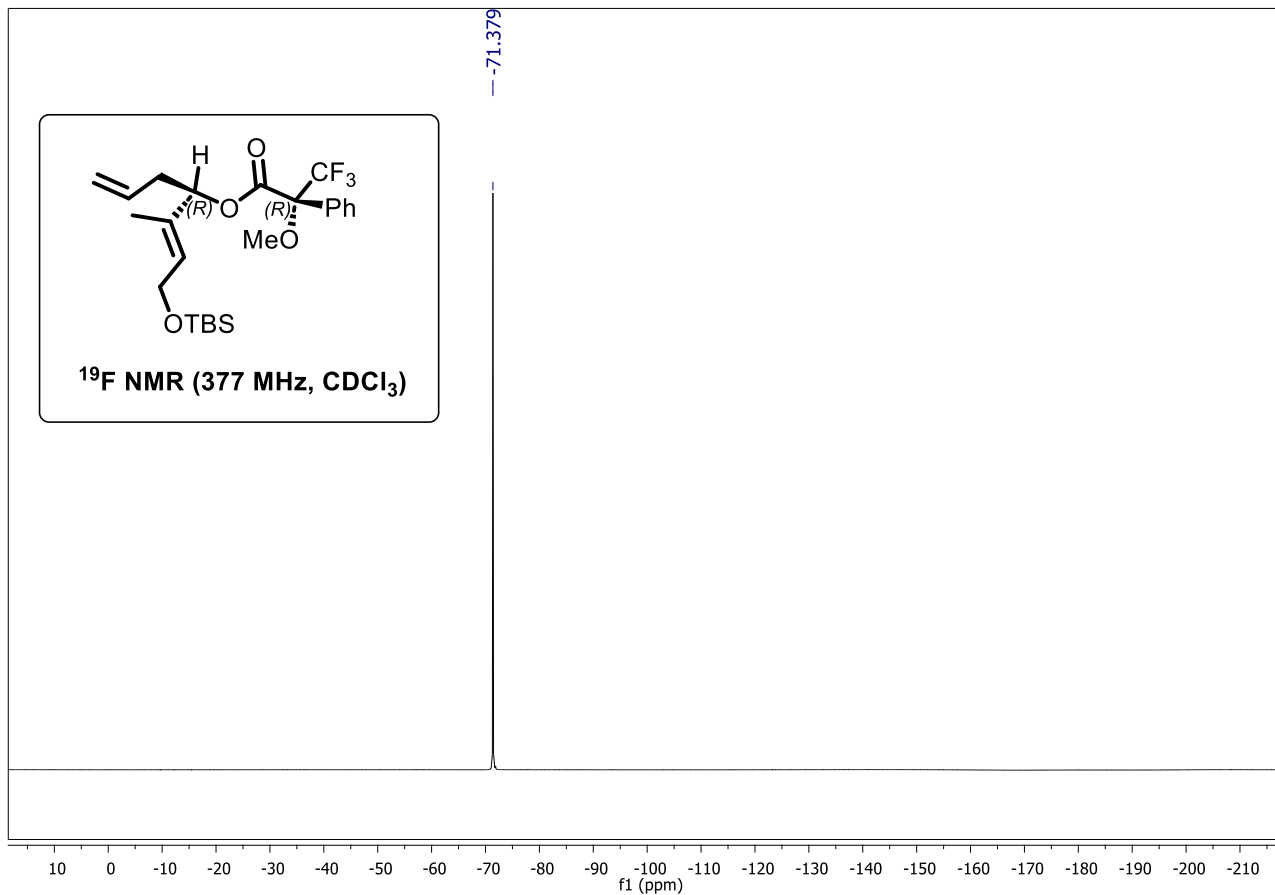

**(*R,E*)-7-((*tert*-Butyldimethylsilyl)oxy)-5-methylhepta-1,5-dien-4-yl (*S*)-3,3,3-trifluoro-2-methoxy-2-phenylpropanoate (SI-13): [See procedure](#)**

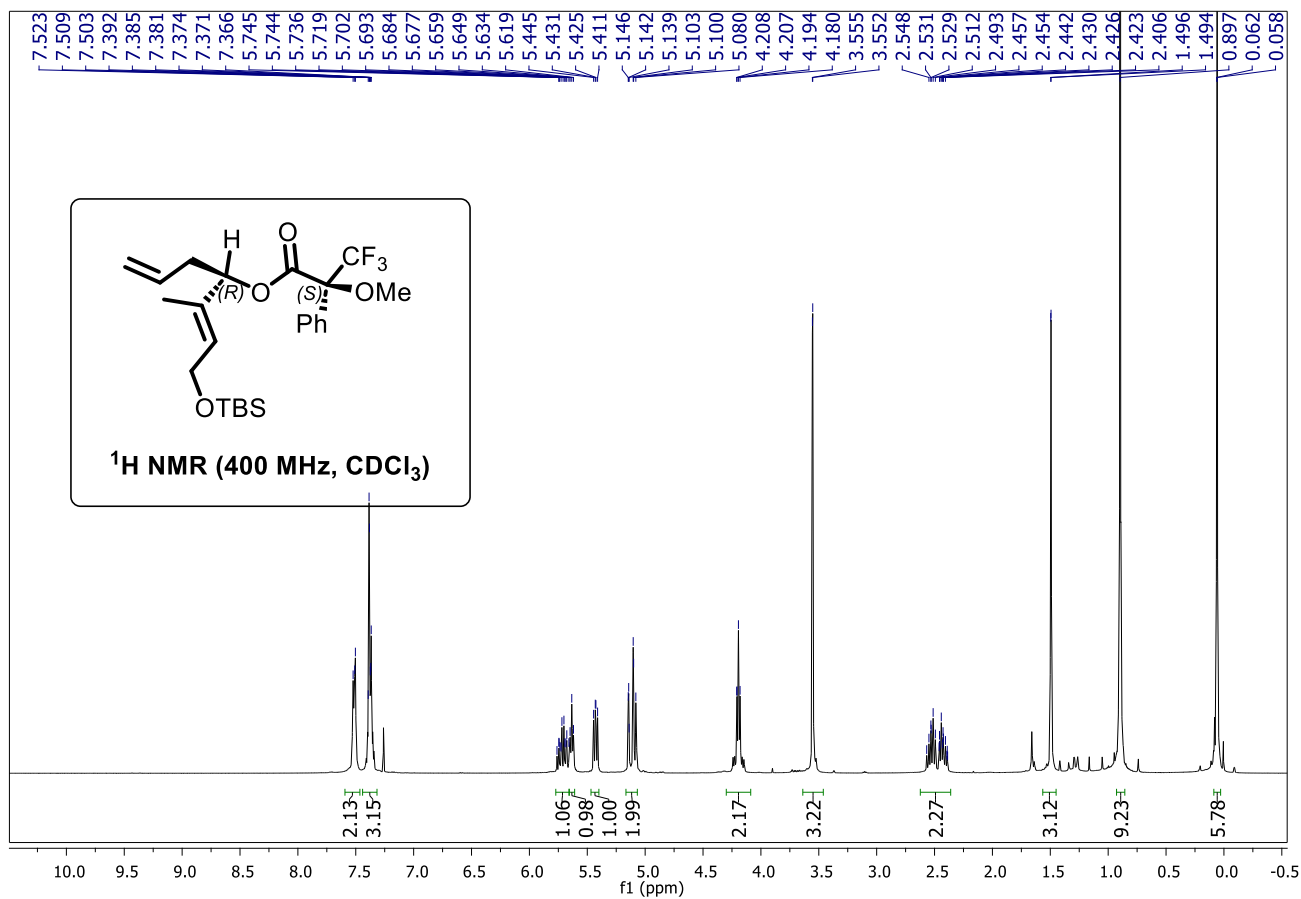

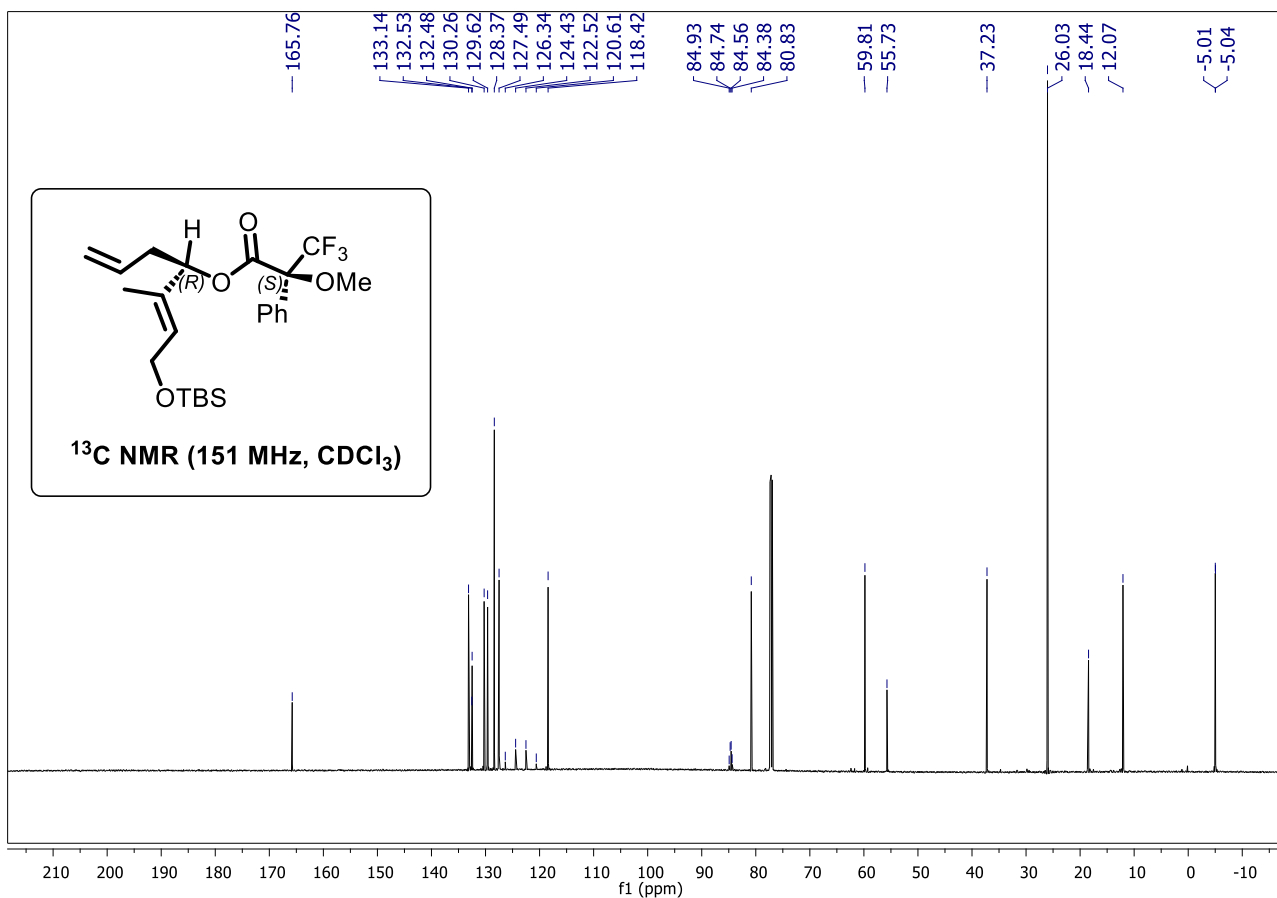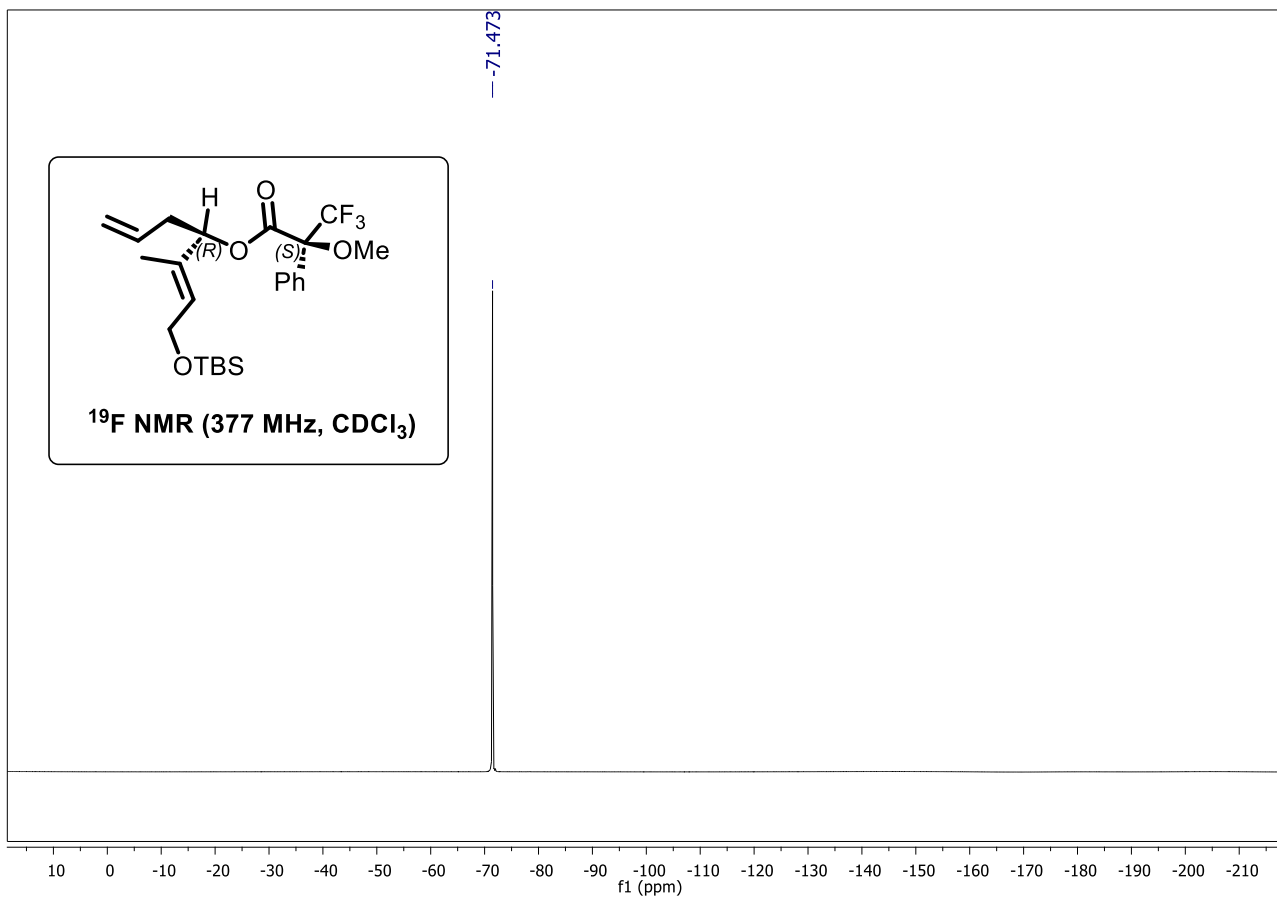



**(*R,E*)-4-((*tert*-Butyldiphenylsilyl)oxy)-3-methylhepta-2,6-dien-1-ol (25):** [See procedure](#)

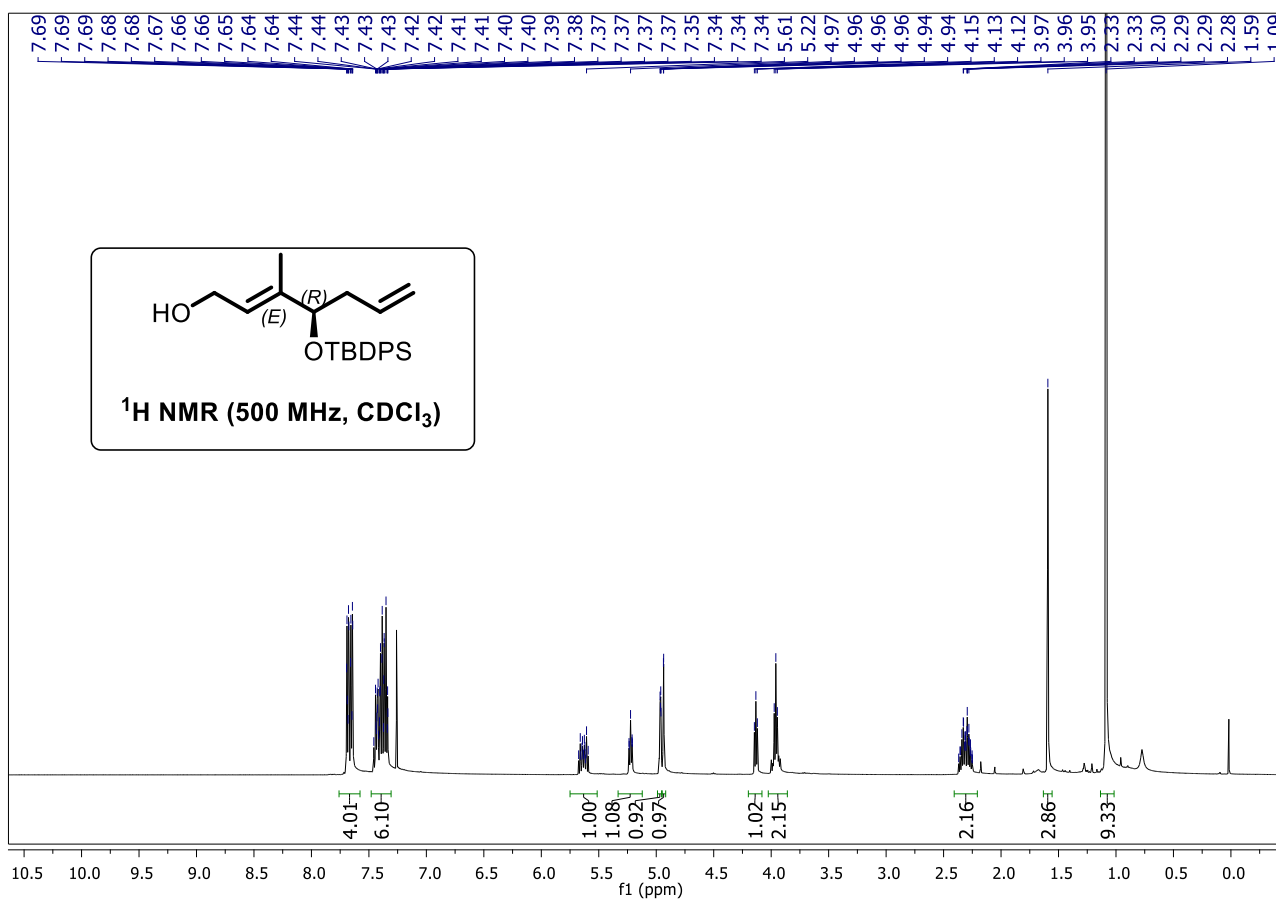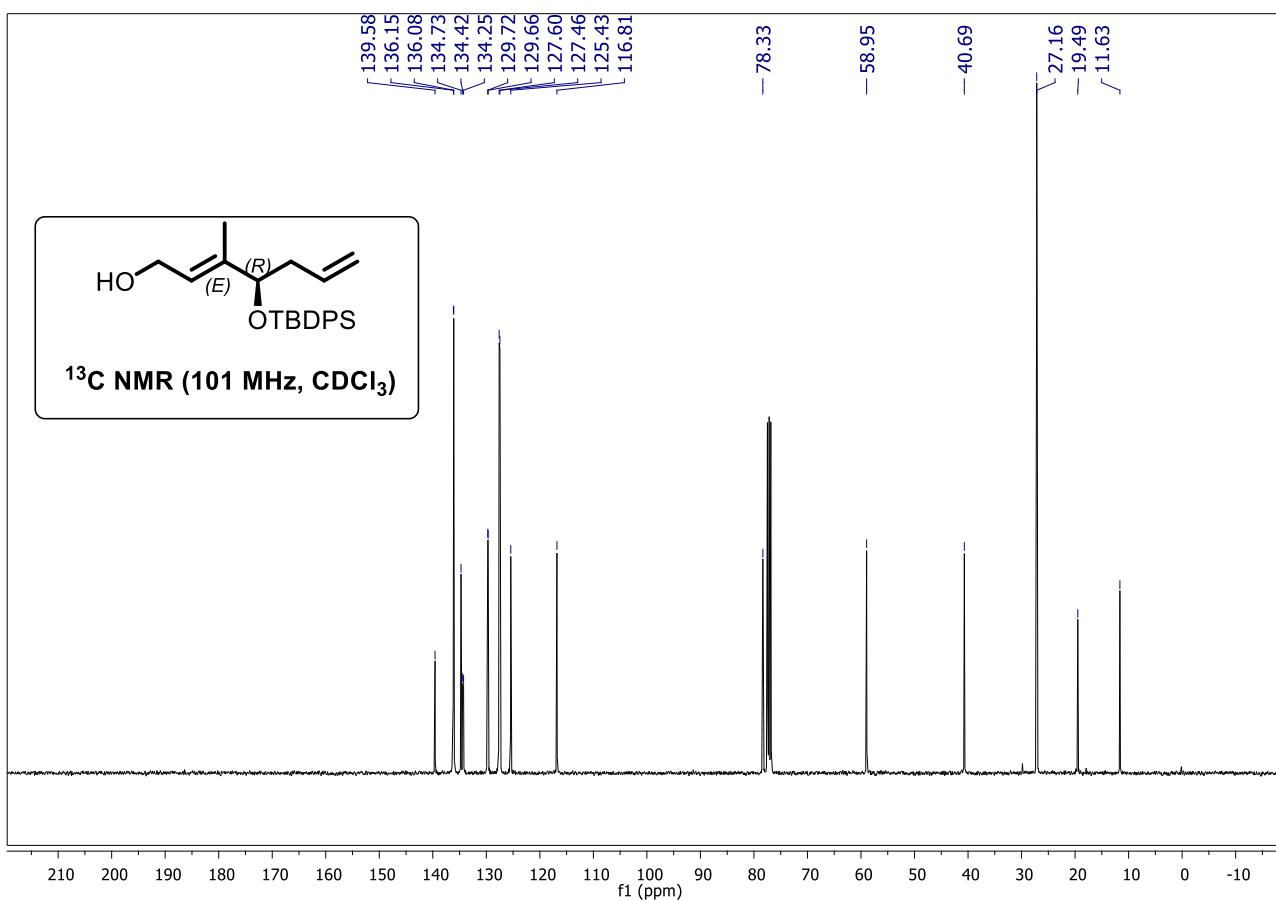

**(*R,E*)-5-((4-((*tert*-Butyldiphenylsilyl)oxy)-3-methylhepta-2,6-dien-1-yl)thio)-1-phenyl-1H-tetrazole (27):** [See procedure](#)

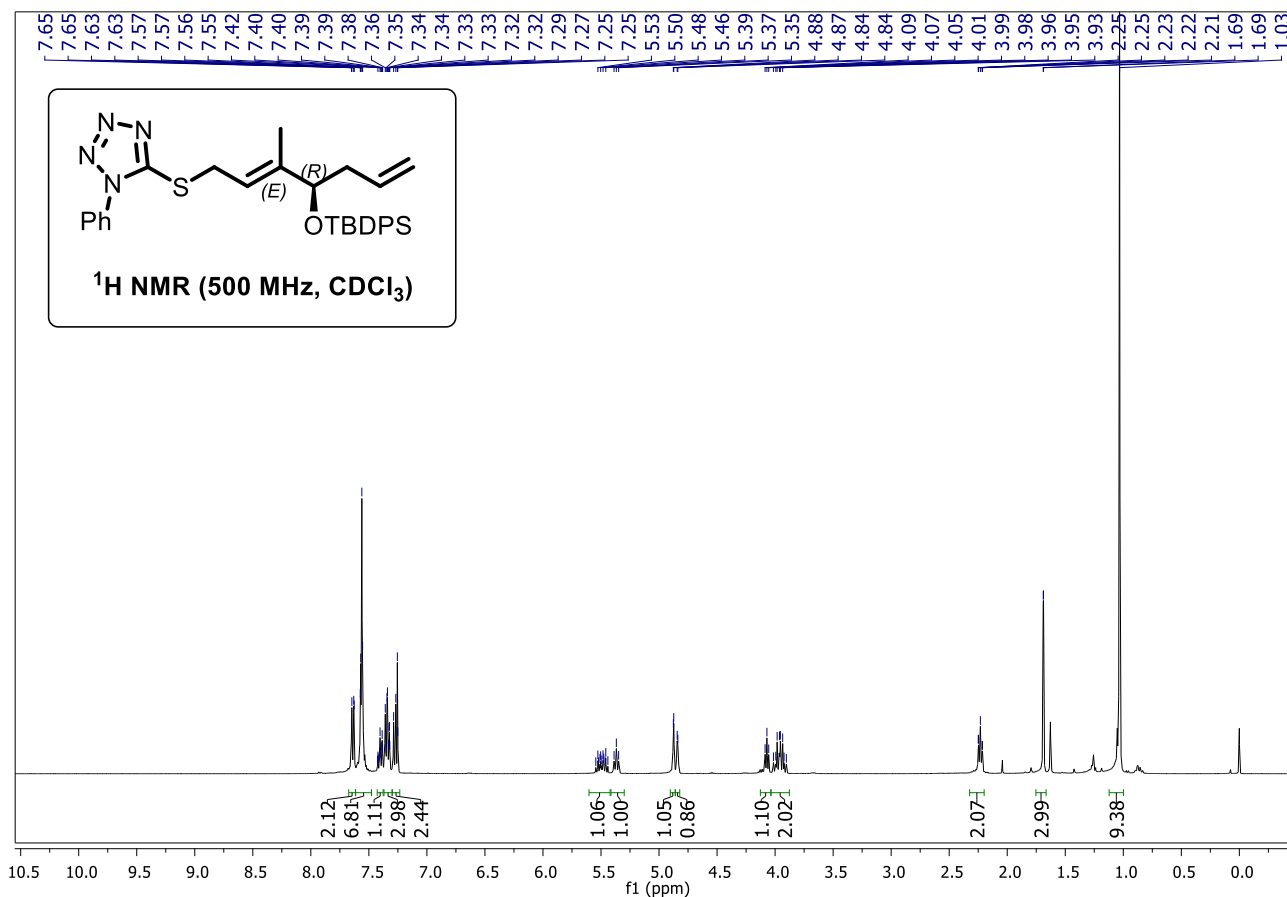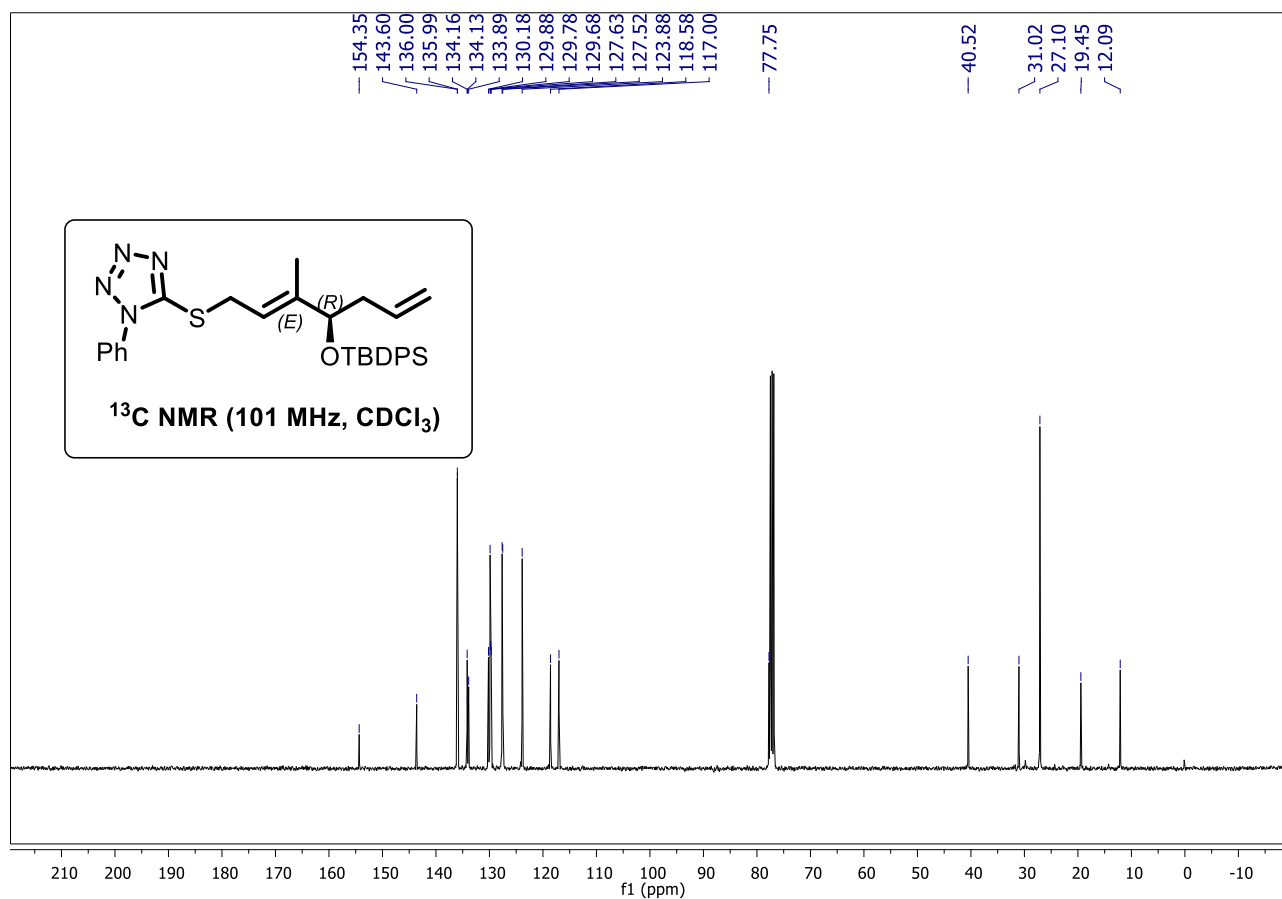

**(*R,E*)-5-((4-((*tert*-Butyldiphenylsilyloxy)-3-methylhepta-2,6-dien-1-yl)sulfonyl)-1-phenyl-1H-tetrazole (28): [See procedure](#)**

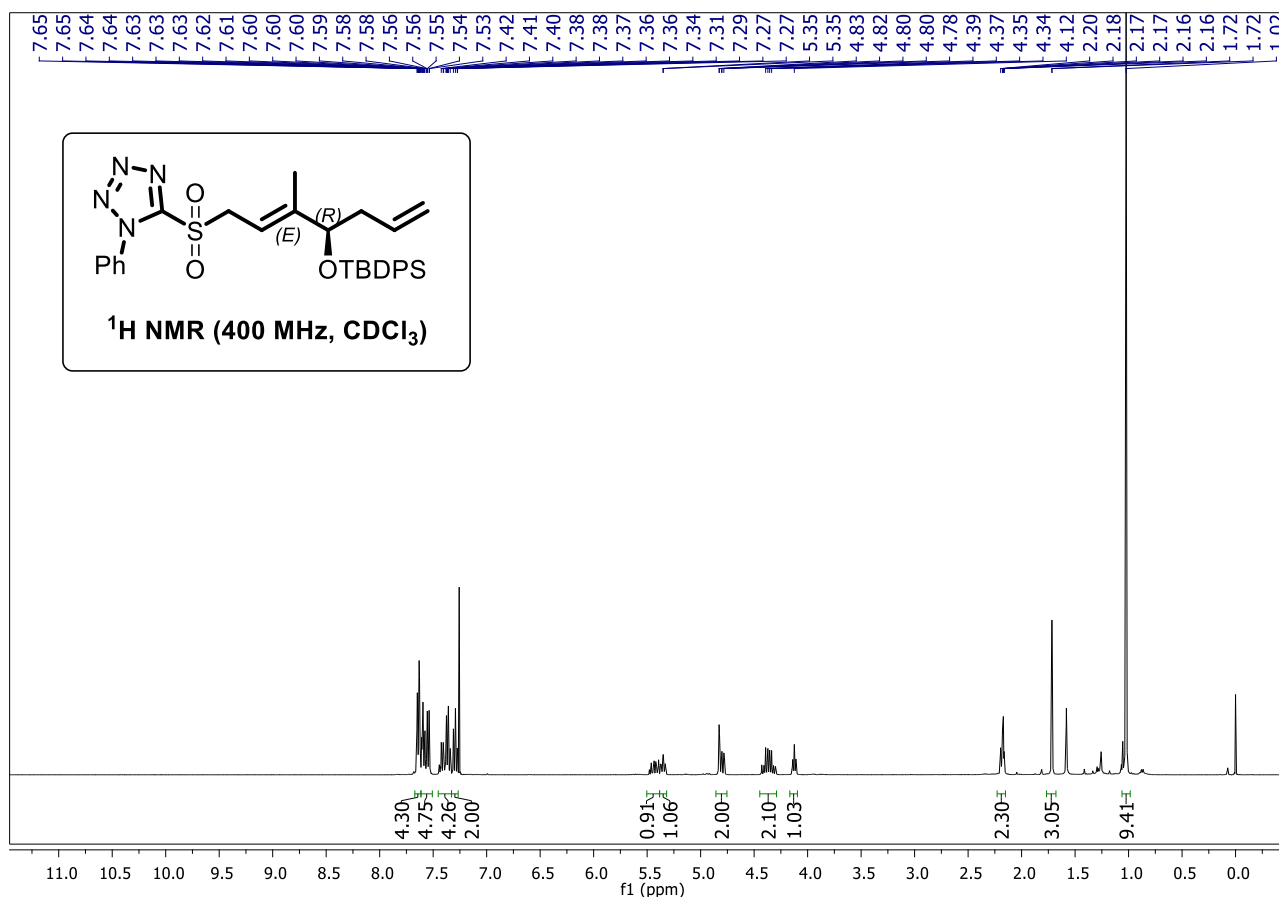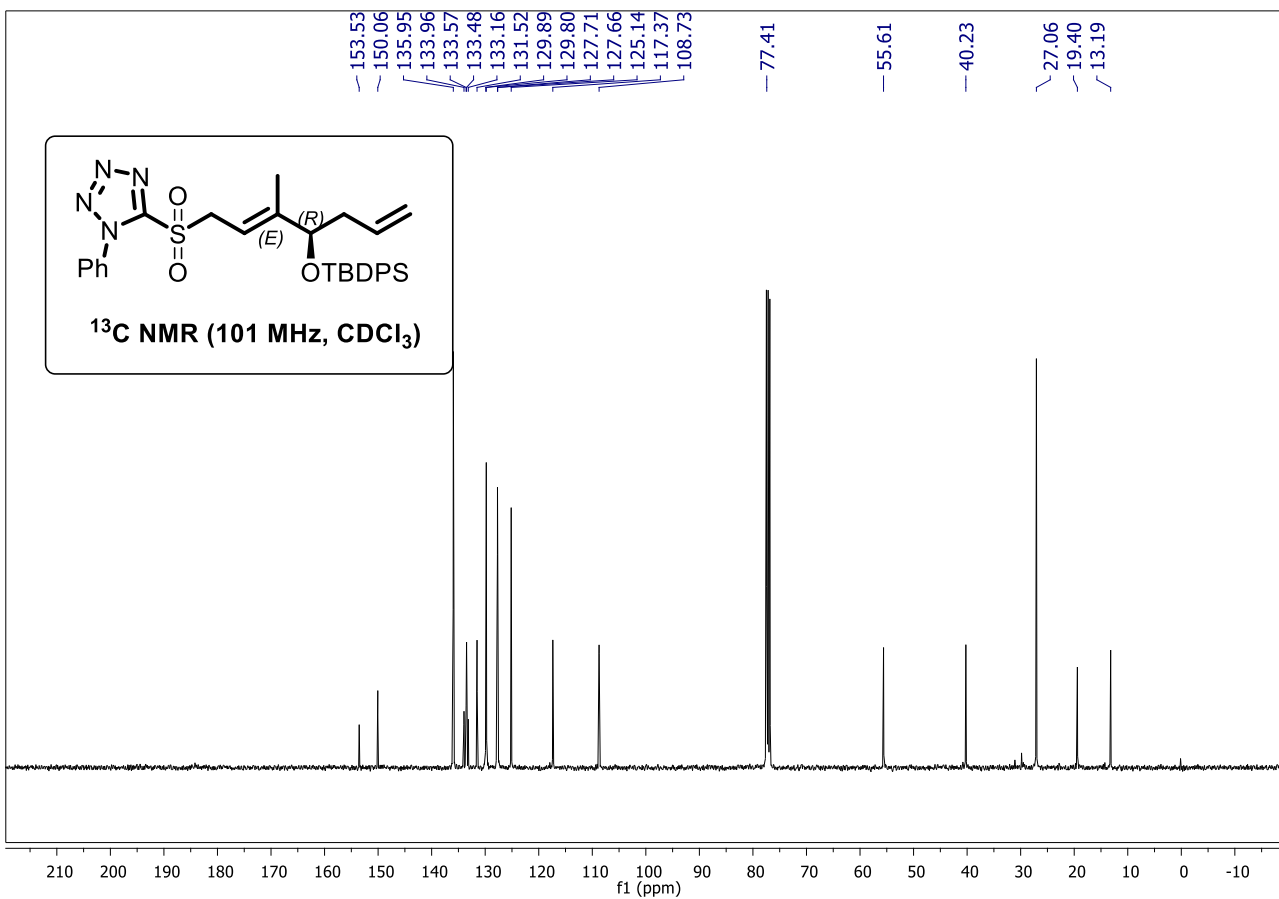

**(5*R*,6*E*,8*E*,10*R*,13*S*,15*S*,16*R*,17*R*)-5-Allyl-13-((*tert*-butyldimethylsilyl)oxy)-17-(3-methoxyphenyl)-2,2,6,10,16,19,19,20-nonamethyl-3,3-diphenyl-15-((triethylsilyl)oxy)-4,18-dioxa-3,19-disilahenicososa-6,8-diene (29): [See procedure](#)**

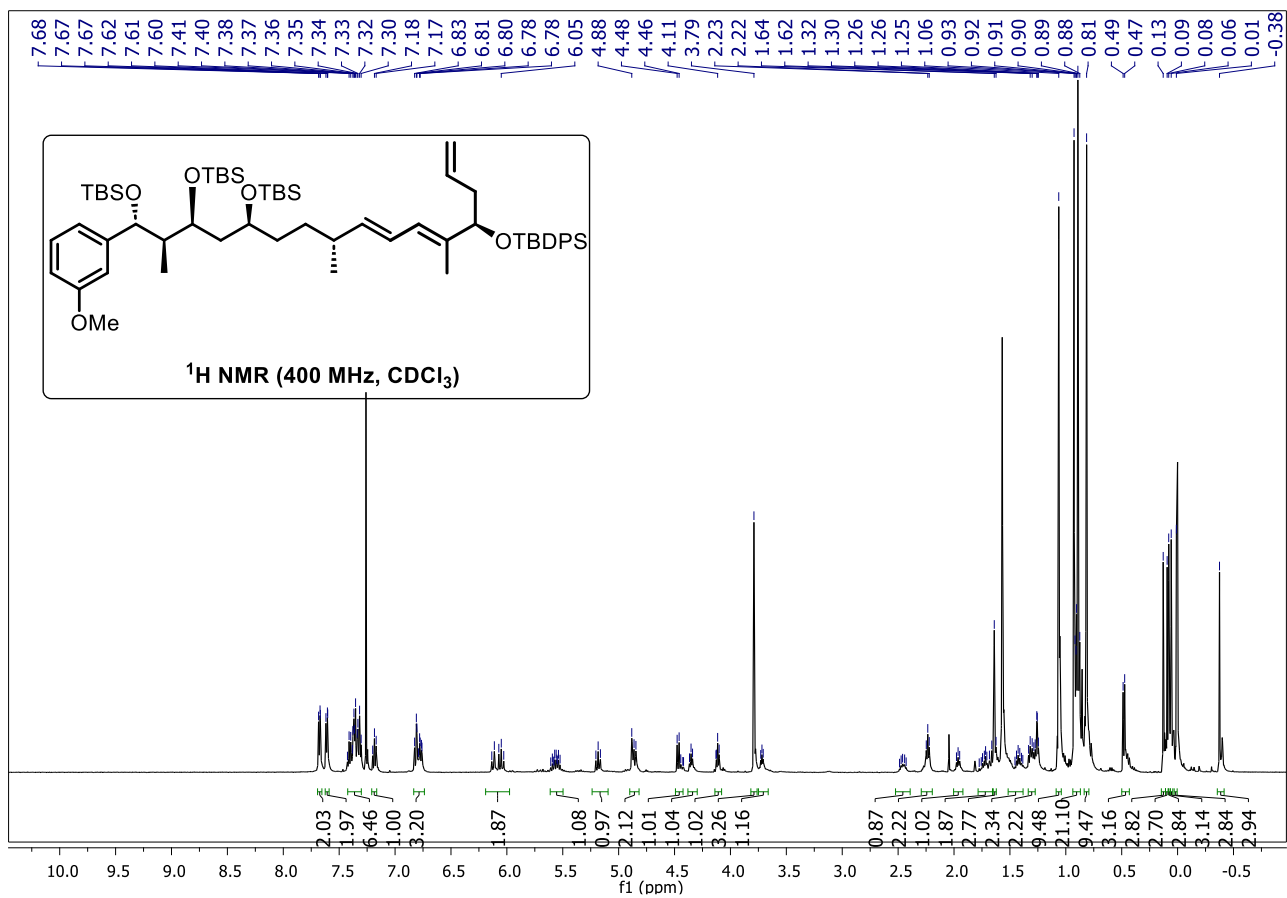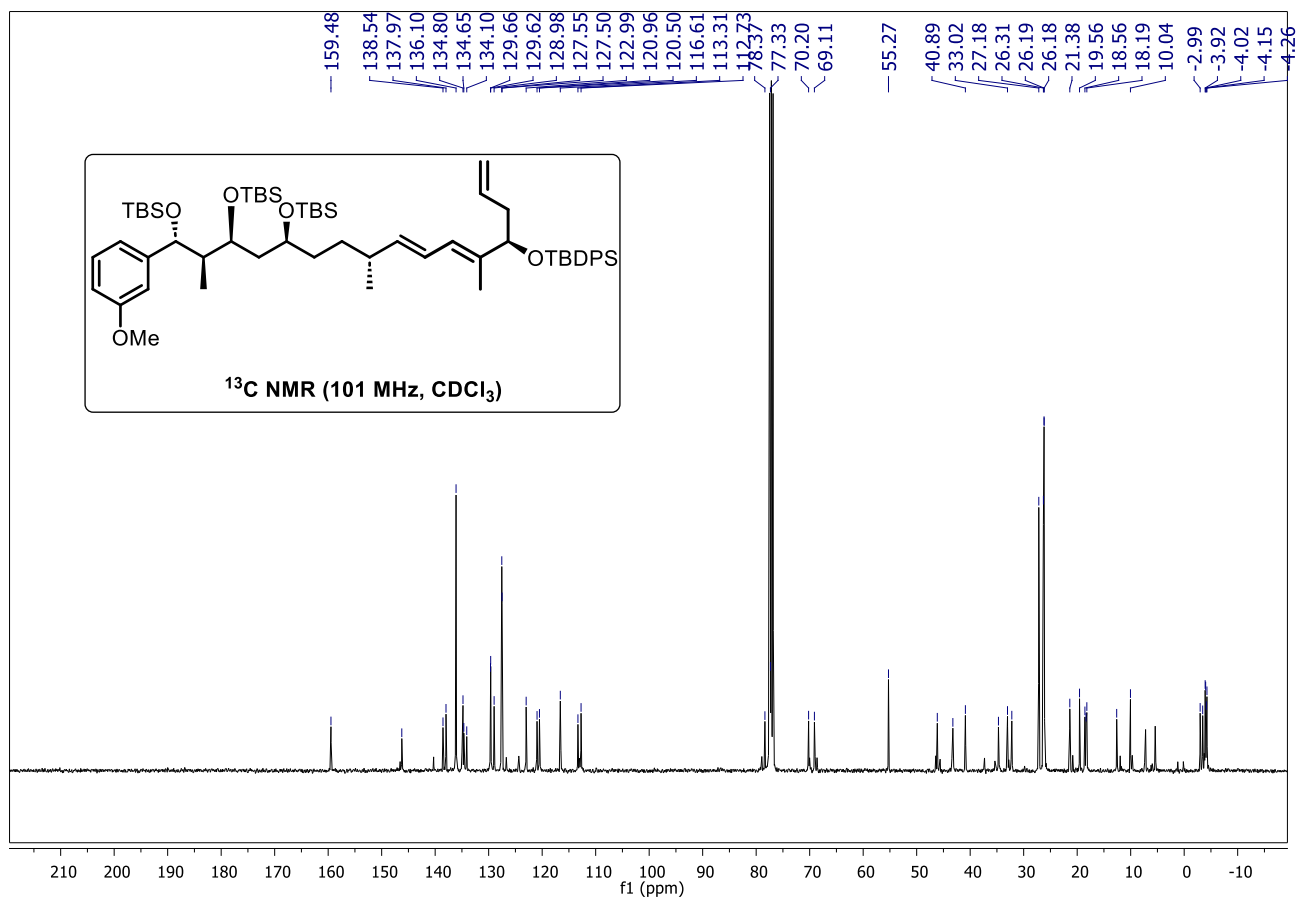

Supplement: d4ob00852a1.pdf [file d4ob00852a1.pdf]
